1 **Rescue of Tomato spotted wilt tospovirus entirely from cDNA clones,**  
2 **establishment of the first reverse genetics system for a segmented**  
3 **(-)RNA plant virus**

4 Mingfeng Feng<sup>a</sup>, Ruixiang Cheng<sup>a</sup>, Minglong Chen<sup>a</sup>, Rong Guo<sup>a</sup>, Luyao Li<sup>a</sup>, Zhike Feng<sup>a</sup>, Jianyan  
5 Wu<sup>a</sup>, Li Xie<sup>b</sup>, Jian Hong<sup>b</sup>, Zhongkai Zhang<sup>c</sup>, Richard Kormelink<sup>d</sup> and Xiaorong Tao<sup>a,1</sup>

6 <sup>a</sup>Department of Plant Pathology, Nanjing Agricultural University, Nanjing 210095, P. R.  
7 China; <sup>b</sup>Analysis Center of Agrobiolgy and Environmental Sciences, Zhejiang University,  
8 Hangzhou 317502, P. R. China; <sup>c</sup>Yunnan Provincial Key Laboratory of Agri-Biotechnology,  
9 Institute of Biotechnology and Genetic Resources, Yunnan Academy of Agricultural Sciences,  
10 Kunming, Yunnan 650223, P. R. China; <sup>d</sup>Laboratory of Virology, Department of Plant Sciences,  
11 Wageningen University, 6708PB Wageningen, The Netherlands

12

13 Author contributions: M.F., Z.F. and X.T. conceived and designed the experiments and H.J., Z.Z.  
14 and R. K. provided input. M.F., R.C., M.C., G.R., L.L., Z.F., J.W., and X.L. performed the  
15 experiments. M.F., R. K. and X.T. wrote the manuscript.

16 The authors declare no conflict of interest.

17 <sup>1</sup>To whom correspondence should be addressed. Email: [taoxiaorong@njau.edu.cn](mailto:taoxiaorong@njau.edu.cn)

18

19 **Running title**

20 Establishment of a reverse genetics system for TSWV

21

22

23 **Abstract**

24 The group of negative strand RNA viruses (NSVs) includes not only dangerous  
25 pathogens of medical importance but also serious plant pathogens of agronomical  
26 importance. Tomato spotted wilt tospovirus (TSWV) is one of those plant NSVs that  
27 cause severe diseases on agronomic crops and pose major threats to global food  
28 security. Its negative-strand segmented RNA genome has, however, always posed a  
29 major obstacle to molecular genetic manipulation. In this study, we report the  
30 complete recovery of infectious TSWV entirely from cDNA clones, the first reverse  
31 genetics (RG) system for a segmented plant NSV. First, a replication and transcription  
32 competent mini-genome replication system was established based on 35S-driven  
33 constructs of the S<sub>(-)</sub>-genomic (g) or S<sub>(+)</sub>-antigenomic (ag) RNA template, flanked by a  
34 5' Hammerhead and 3' Ribozyme sequence of Hepatitis Delta virus, a nucleocapsid  
35 (N) protein gene and codon-optimized viral RNA dependent RNA polymerase (RdRp)  
36 gene. Next, a movement competent mini-genome replication system was developed  
37 based on M<sub>(-)</sub>-gRNA, which was able to complement cell-to-cell and systemic  
38 movement of reconstituted ribonucleoprotein complexes (RNPs) of S RNA replicon.  
39 After further optimization, infectious TSWV and derivatives carrying eGFP reporters  
40 were successfully rescued *in planta* via simultaneous expression of full-length cDNA  
41 constructs coding for S<sub>(+)</sub>-agRNA, M<sub>(-)</sub>-gRNA and L<sub>(+)</sub>-agRNA. Viral rescue occurred  
42 in the additional presence of various viral suppressors of RNAi, but TSWV NSs  
43 interfered with the rescue of genomic RNA. The establishment of a RG system for  
44 TSWV now allows detailed molecular genetic analysis of all aspects of tospovirus life

45 cycle and their pathogenicity.

46 **Key words:** Reverse genetics system, Tomato spotted wilt tospovirus, negative-strand  
47 RNA virus, tripartite RNA genome, mini-replicon, genome-length infectious cDNA  
48 clones

49

## 50 **Significance**

51 For many different animal-infecting segmented negative-strand viruses (NSVs), a  
52 reverse genetics system has been established that allows the generation of mutant  
53 viruses to study disease pathology and the role of *cis*- and *trans*-acting elements in the  
54 virus life cycle. In contrast to the relative ease to establish RG systems for  
55 animal-infecting NSVs, establishment of such system for the plant-infecting NSVs  
56 with a segmented RNA genome so far has not been successful. Here we report the  
57 first reverse genetics system for a segmented plant NSV, the Tomato spotted wilt  
58 tospovirus, a virus with a tripartite RNA genome. The establishment of this RG  
59 system now provides us with a new and powerful platform to study their disease  
60 pathology during a natural infection.

61

62

63

64

65

66

## 67 **Introduction**

68 Negative-stranded RNA viruses (NSVs) present of a large group of viruses that  
69 include well known members of medical importance such as Ebola (EBOV), Rabies  
70 (RV), Influenza A (FLUAV) and Rift valley fever virus (RVFV) (1, 2). Infections with  
71 these viruses may cause considerable morbidity and mortality in humans and form an  
72 important burden on national health care budgets. The group also contains plant  
73 viruses of agronomical importance such as Tomato spotted wilt virus (TSWV) and  
74 Rice stripe virus (RSV) that cause severe diseases on agronomic crops and pose major  
75 threats to global food security (3-10).

76 Tospoviruses belong to the NSV with a segmented (tripartite) RNA genome and  
77 rank among the most devastating plant viruses worldwide (11, 12). They are classified  
78 in the family of *Tospoviridae* within the order *Bunyavirales* (13). TSWV is the type  
79 member of the only genus *Orthotospovirus*, in the family of *Tospoviridae* (11, 13).  
80 TSWV has very broad host range infecting more than one thousand plant species over  
81 80 families (14) and is transmitted by thrips in a persistent, propagative manner (6, 9,  
82 15, 16). Crops losses due to this virus have been estimated more than one billion  
83 dollars annually (7, 14).

84 TSWV consists of spherical, enveloped virus particles (80-120 nm) that contain a  
85 tripartite genome consisting of a large- (L), medium- (M), and small-sized (S) RNA  
86 segment (11). The L segment is of entire negative polarity, whereas the S and M  
87 segments are ambisense. The L segment encodes the viral RNA-dependent RNA  
88 polymerase (RdRp, ~330 kDa) that is required for viral RNA replication and mRNA

89 transcription (17, 18). The viral (v) strand of the M segment encodes the precursor to  
90 the glycoproteins (Gn and Gc, with n and c referring to the amino- and  
91 carboxy-terminal end of the precursor, respectively) in the negative sense and a  
92 nonstructural protein (NSm) in the positive sense. The glycoproteins are required for  
93 particle maturation and are presented as spikes on the surface of the virus envelope  
94 membrane (19, 20). They also play a major role as determinants for thrips vector  
95 transmission (21). The NSm plays pivotal roles in cell-to-cell and long distance  
96 movement of TSWV (22-26). The vRNA of the S segment codes for the nucleocapsid  
97 protein (N) in the negative sense and a nonstructural protein (NSs) in the positive  
98 sense. The N protein participates in the formation of ribonucleoprotein complexes  
99 (RNPs) (27-29) and is required for viral intracellular movement (30, 31). The NSs  
100 protein functions as a RNA silencing suppressor to defend against the plant innate  
101 immunity system (32-34), and triggers a defence response and concomitant  
102 programmed cell-death mediated by the dominant resistance gene *Tsw* from *Capsicum*  
103 *chinense* (35-37).

104 As a virus documented for almost a century (7, 38), TSWV has served as an  
105 important model for studying the molecular biology of tospovirus and other plant  
106 NSVs with segmented genomes (6-8, 11). However, its negative-strand tripartite RNA  
107 genome has posed a major obstacle to genetic manipulation of the virus. To initiate an  
108 infection cycle with this virus requires at least RNPs, the minimal infectious units that  
109 consist of viral RNA encapsidated by the N protein and associated with a few copies  
110 of the viral RNA-dependent RNA polymerase (6, 11). TSWV RNPs can be

111 mechanically transferred from infected to healthy plants, however, transmission by  
112 thrips requires RNPs to be enveloped and spiked with the glycoproteins (21).

113 The first animal-infecting and related counterpart of TSWV with a segmented  
114 RNA genome to be rescued entirely from cDNA was from Bunyamwera virus in 1996  
115 (39). Following this study, soon other segmented NSV were rescued from plasmid  
116 DNA. The influenza virus, containing a genome of eight RNA segments, was  
117 recovered in 1999 (40), while the first Arenavirus, with a bipartite RNA genome, was  
118 recovered in 2006 (41). Just recently, the first nonsegmented plant NSVs from the  
119 *Mononegavirales* have been rescued, *i.e.* the Sonchus yellow net nucleorhabdovirus  
120 (SYNV) (42, 43). A recent study also reported on the establishment of a TSWV S  
121 RNA-based mini-replicon in yeast (44), but in contrast to replication, no  
122 transcriptional activity was observed.

123 In contrast to the relative ease to establish RG systems for animal-infecting NSVs,  
124 reconstitution of infectious RNPs *in planta* for the plant-infecting viruses with a  
125 segmented RNA genome seems particularly difficult. Not only have all DNA  
126 constructs to be delivered into one and the same plant cell but for TSWV the RdRp is  
127 exceptionally large (~330 kDa) compared to the RdRp of most other related  
128 bunyaviruses (~240-260 kDa) and to typical open reading frames (ORFs) from the  
129 plant genome. Expression of such a large protein gene may not only be very  
130 inefficient but mRNA transcripts resulting from RNA polymerase II transcription of  
131 35S promoter-constructs in the nucleus may also face splicing of cryptic splicing sites.  
132 Moreover, achieving proper ratios of all three genome segments in plant cells is not

133 easily and consistently achieved by agrobacterium-mediated delivery of several  
134 constructs, which will affect the outcome of each individual experiment. All these  
135 obstacles may hamper the construction of a reverse genetics system for TSWV in  
136 plants.

137 In this study, we report the complete recovery of infectious TSWV entirely from  
138 cDNA clones in plants, the first reverse genetics system for a segmented plant NSV.  
139 The establishment of this system presents the start of a new research era for TSWV  
140 and provides us an entirely new and powerful platform to study the basic principles of  
141 the tospovirus life cycle and viral pathogenicity.

142

## 143 **Results**

### 144 **Development of a TSWV S<sub>(-)</sub>-genomic RNA mini-replicon system in *Nicotiana*** 145 ***benthamiana***

146 Prior to the rescuing of TSWV entirely from cDNA clones, a mini-replicon system  
147 based on the S RNA-template was established. To this end, a DNA copy of the TSWV  
148 S<sub>(-)</sub>-genomic RNA (gRNA) was cloned and flanked with a self-cleaving hammerhead  
149 (HH) ribozyme at the 5'-terminus and a hepatitis delta virus (HDV) ribozyme at the  
150 3'-terminus. For visual monitoring, quantification purposes, and discrimination  
151 between primary and secondary genome transcription, the NSs and N genes were  
152 replaced with mCherry and eGFP, respectively (Fig. 1A). The resulting S<sub>(-)</sub>  
153 mini-replicon reporter was cloned in a binary vector pCB301 downstream a double  
154 35S promoter (2×35S) and denoted 35S:SR<sub>(-)</sub>mCherry&eGFP (Fig. 1A), or a T7 promoter

155 and denoted T7: SR<sub>(-)</sub>mCherry&eGFP (Fig. S1A). The RdRp and N ORFs were amplified  
156 from cDNA of TSWV infected tissue and cloned into pCambia 2300 binary vector  
157 downstream a double 35S promoter. Binary vector constructs of the RdRp, N and four  
158 viral RNA silencing suppressor genes (VSRs: NSs from TSWV, P19 from Tomato  
159 bushy stunt tobravirus (TBSV), HcPro from Tobacco etch potyvirus (TEV) and  $\gamma$ B  
160 from Barley yellow mosaic hordeivirus (BYMV)) were agroinfiltrated in *N.*  
161 *benthamiana* either with 35S:SR<sub>(-)</sub>mCherry&eGFP or with T7:SR<sub>(-)</sub>mCherry&eGFP and a  
162 35S-driven T7 RNA polymerase gene construct and next monitored for eGFP  
163 fluorescence. However, during repeated experiments no eGFP fluorescence was  
164 observed from 35S:SR<sub>(-)</sub>mCherry&eGFP nor T7:SR<sub>(-)</sub>mCherry&eGFP (Fig. S1B and C).

165 The possibility of failures to establish a mini-replicon system for TSWV could  
166 be due to low (unstable) expression of the TSWV RdRp protein, therefore, the codon  
167 usage of the RdRp gene was optimized for *N. benthamiana* and potential intron  
168 splicing sites were removed. The optimized RdRp gene (RdRp<sub>opt</sub>) was cloned in a  
169 binary, 35S-driven expression vector and next, again agroinfiltrated in *N.*  
170 *benthamiana* leaves together with binary expression constructs of the N gene, the four  
171 VSR gene constructs and the 35S:SR<sub>(-)</sub>mCherry&eGFP mini-replicon reporter. At 5 days  
172 post infiltration (dpi), expression of the reporter genes was analyzed by monitoring  
173 for mCherry and eGFP fluorescence in the *N. benthamiana* leaves (Fig. 1A and B).  
174 Whereas no fluorescence was observed in the controls, *i.e.* leaves agroinfiltrated with  
175 35S:SR<sub>(-)</sub>mCherry&eGFP alone or co-expressing 35S:SR<sub>(-)</sub>mCherry&eGFP with RdRp<sub>opt</sub> or N  
176 only, eGFP and mCherry fluorescence was consistently observed in leaves



177 agroinfiltrated with 35S:SR<sub>(-)</sub>mCherry&eGFP and both N and RdRp<sub>opt</sub> (Fig. 1C). This was  
178 confirmed by Western immunoblot analysis (Fig. 1D).

179 Northern blot analysis showed that both the genomic RNA and anti-genomic  
180 RNA of the SR<sub>(-)</sub>mCherry&eGFP mini-replicon were detected in the leaves that  
181 co-expressed both N and RdRp (here after RdRp represent optimized RdRp) at 5 dpi,  
182 but not in the leaves co-expressing RdRp or N only (Fig. 1E). In addition, using an  
183 anti-sense eGFP probe genome length S RNA subgenomic-sized RNA, likely  
184 presenting eGFP transcripts, were detected (Fig. 1E, upper panel). A time course  
185 analysis showed that eGFP and mCherry fluorescence in *N. benthamiana* leaves was  
186 visible from 3 dpi onwards and gradually increased to 12 dpi (Fig. S2A). This was  
187 also confirmed by immunoblot analysis (Fig. S2B).

188 Altogether the results indicated that in *N. benthamiana* the 35S replicon  
189 transcript SR<sub>(-)</sub>mCherry&eGFP was properly processed by the HH and RZ, and next used  
190 by the RdRp as template for primary transcription of mRNA<sup>eGFP</sup>, as well replicated  
191 into SR<sub>(-)</sub>mCherry&eGFP for secondary transcription of mRNA<sup>mCherry</sup>. Furthermore, the  
192 codon-optimized RdRp clearly exhibited full functionality in supporting viral genome  
193 transcription and replication, while the wild type RdRp for unknown reasons didn't.  
194 When the T7:SR<sub>(-)</sub>mCherry&eGFP mini-replicon reporter was co-expressed with T7 RNA  
195 polymerase, RdRp, N and four VSRs in *N. benthamiana* leaves, somewhat  
196 unexpected, no mCherry or eGFP fluorescence was detected (Fig. S1C and D).

197

198 **The optimization of the concentration of N and RdRp, and VSRs on TSWV**

199 **SR<sub>(-)</sub>mCherry&eGFP mini-replicon**

200 Having established a TSWV S<sub>(-)</sub>-gRNA based mini-replicon system in *N.*  
201 *benthamiana*, attempts were made to further optimize the system. To this end, binary  
202 constructs of the TSWV S<sub>(-)</sub> mini-replicon were agroinfiltrated into *N. benthamiana* in  
203 the additional presence of varying amounts of N and RdRp gene expression constructs.  
204 During these experiments the amounts of *Agrobacterium* carrying the N expression  
205 construct were increased (from OD<sub>600</sub> 0.2 to 0.8) while the *Agrobacterium* harboring  
206 the RdRp expression construct was kept fixed at OD<sub>600</sub> 0.2, and vice versa. The results  
207 showed highest eGFP reporter gene expression from the 35S:SR<sub>(-)</sub>mCherry&eGFP  
208 mini-replicon when *Agrobacterium* suspensions bearing N and RdRp expression  
209 constructs were both infiltrated at OD<sub>600</sub> 0.2. When *Agrobacterium* harboring either N  
210 or RdRp was infiltrated onto *N. benthamiana* leaves at OD<sub>600</sub> > 0.4 the expression of  
211 eGFP from the S<sub>(-)</sub>-mini-replicon greatly decreased (Fig. 2 A, B and C). Furthermore,  
212 at high concentrations (OD<sub>600</sub> > 0.6) of *Agrobacterium*, the visible cell death was  
213 triggered in the infiltrated leaves (data not shown).

214 Next, in a similar approach and using the optimized setting, the effects of VSRs  
215 on the replication and transcription of the SR<sub>(-)</sub>mCherry&eGFP mini-replicon were  
216 investigated. Without the addition of VSRs, mCherry and eGFP fluorescence was only  
217 observed in a small number of cells, but these numbers increased in the addition of  
218 TSWV NSs and/or the three VSRs P19, HcPro and  $\gamma$ b. The largest number of cells  
219 showing eGFP expression from the S<sub>(-)</sub> mini-replicon, as monitored by fluorescence,  
220 were obtained when all four VSRs were added (Fig. 2D and E). These observations

221 were further confirmed by immunoblot assays (Fig. 2E).

## 222 **The role of *cis*-acting sequences in transcription and replication of the TSWV**

### 223 **SR<sub>(-)</sub>mCherry&eGFP replicon**

224 Using the optimized SR<sub>(-)</sub>mCherry&eGFP mini-replicon system, the role of the 5'-  
225 untranslated region (5'-UTR), 3'-UTR and the non-coding A/U-rich intergenic region  
226 (IGR) between NSs and N genes (45, 46) in replication-transcription was examined.  
227 To this end, SR<sub>(-)</sub>mCherry&eGFP derivatives were made from which the 5'-UTR, IGR or  
228 3'-UTR, respectively, were deleted and next tested on transcription-replication using  
229 the mini-replicon assay (Fig. S3A). No eGFP and mCherry fluorescence was observed  
230 when the 5'-UTR or 3'-UTR of SR<sub>(-)</sub>mCherry&eGFP was removed. However, eGFP  
231 reporter expression could still be detected when the IGR of SR<sub>(-)</sub>mCherry&eGFP was  
232 deleted (Fig. S3B). Immunoblot analysis confirmed the expression of eGFP from  
233 SR<sub>(-)</sub>mCherry&eGFP $\Delta$ IGR ( $\Delta$ IGR), and lack of expression from SR<sub>(-)</sub>mCherry&eGFP $\Delta$ 5'UTR  
234 ( $\Delta$ 5'UTR) and SR<sub>(-)</sub>mCherry&eGFP $\Delta$ 3'UTR ( $\Delta$ 3'UTR) (Fig. S3C). To analyze whether the  
235 lack of eGFP expression was a matter of translation or transcription-replication,  
236 samples from infiltrated *N. benthamiana* were collected and analyzed by Northern  
237 blot. The results showed that for SR<sub>(-)</sub>mCherry&eGFP $\Delta$ 5'UTR ( $\Delta$ 5'UTR) and  
238 SR<sub>(-)</sub>mCherry&eGFP $\Delta$ 3'UTR ( $\Delta$ 3'UTR), weak signals of genomic RNA could be detected but  
239 they are not similar to the signal strength obtained for the genome length and mRNA  
240 molecules as seen with the SR<sub>(-)</sub>mCherry&eGFP replicon, while anti-genomic RNAs could  
241 not be detected (Fig. S3D). For SR<sub>(-)</sub>mCherry&eGFP $\Delta$ IGR ( $\Delta$ IGR) both RNA strands were  
242 detected (Fig. S3D), suggesting that IGR is not essential for viral RNA synthesis,

243 while no signal is obtained for the mRNA length molecules as seen with the  
244 SR<sub>(-)</sub>mCherry&eGFP replicon. Taken together, these findings suggest that the 5'-UTR and  
245 3'-UTR play an essential role in viral transcription and replication of TSWV RNA  
246 segments.

247

### 248 **Development of a TSWV S<sub>(+)</sub>-agRNA based mini-replicon system**

249 For many reverse genetics systems of NSV, mini-replicons have initially been  
250 established based on gRNA (vRNA). Here, we managed to develop a first system for  
251 TSWV based on antigenomic (ag)RNA (vcRNA). In order to analyze whether a  
252 system could be developed based on agRNA, a S<sub>(+)</sub>-agRNA mini-replicon was  
253 constructed similarly to the one based on S<sub>(-)</sub>-gRNA but in which the N gene was  
254 maintained and only the NSs gene was replaced by eGFP, denoted SR<sub>(+)</sub>eGFP (Fig. 3A).

255 In analogy to the replicon assays with SR<sub>(-)</sub>mCherry&eGFP, *N. benthamiana* leaves were  
256 agro-infiltrated with binary expression constructs of SR<sub>(+)</sub>eGFP, four VSRs and either N  
257 or RdRp separately or together, respectively, and monitored for eGFP fluorescence.

258 Whereas eGFP fluorescence, resulting from primary transcription of the replicon  
259 transcript by viral RdRp, was not detected when SR<sub>(+)</sub>eGFP was expressed alone or in  
260 the additional presence of N, eGFP fluorescence was observed when SR<sub>(+)</sub>eGFP was  
261 co-expressed with both RdRp and N, but also when SR<sub>(+)</sub>eGFP was co-expressed with  
262 RdRp alone (Fig. 3B). This strongly indicated that a certain (residual) amount of

263 SR<sub>(+)</sub>eGFP transcripts, resulting from 35S transcription, did not become fully processed  
264 by the HH and RZ and remained functional in translation, thereby giving rise to N

265 protein. This was confirmed by Western immunoblot analysis (Fig. 3C). Northern blot  
266 analysis furthermore showed that samples from the replicon assays performed in the  
267 presence of RdRp and N or RdRp alone, besides eGFP mRNA transcripts, also  
268 contained agRNA and gRNA of SR<sub>(+)eGFP</sub>, indicating the occurrence of replication  
269 (Fig. 3D). Altogether, these results demonstrate that the N protein can also be  
270 expressed from the SR<sub>(+)eGFP</sub> replicon to support its transcription and replication. This  
271 provides an attractive alternative to the S<sub>(-)</sub>-gRNA based mini-replicon as additional  
272 binary expression constructs for N do not have to be supplied anymore.

273

#### 274 **Development of a M<sub>(-)</sub>-gRNA based mini-replicon for cell-to-cell movement of** 275 **TSWV in *N. benthamiana***

276 As a first step towards development of a reverse genetics system to rescue TSWV  
277 virus entirely from cDNA, a movement competent mini-replicon was also established.  
278 To this end, a TSWV M<sub>(-)</sub>-gRNA based mini-replicon was constructed, similar as the  
279 ones made for S<sub>(-)</sub> and S<sub>(+)</sub>. Within this construct the NSm cell-to-cell movement  
280 protein gene was maintained but the GP ORF was exchanged for eGFP, resulting in a  
281 mini-replicon designated as MR<sub>(-)eGFP</sub> (Fig. 4A). After *Agrobacterium*-mediated  
282 delivery into *N. benthamiana*, no eGFP fluorescence was observed in leaves  
283 containing the MR<sub>(-)eGFP</sub> replicon with RdRp or N. However, in the presence of both  
284 RdRp and N, eGFP fluorescence was observed in many cells that connected each  
285 other (Fig. 4B and C). In comparison to the eGFP fluorescence always expressed in a  
286 single plant cells from SR<sub>(-)mCherry&eGFP</sub> or SR<sub>(+)eGFP</sub> reporter, the results suggested that

287 the MR<sub>(-)eGFP</sub> mini-replicon has moved from cell-to-cell in *N. benthamiana* leaves.  
288 Northern blot analysis confirmed the synthesis of gRNA, agRNA and  
289 (subgenomic-length) eGFP mRNA transcripts of the MR<sub>(-)eGFP</sub> replicon in the  
290 presence of both RdRp and N, but not with RdRp or N only (Fig. 4D).

291 To further substantiate the findings on possible cell-to-cell movement of the  
292 MR<sub>(-)eGFP</sub> mini-replicon, a stop codon was introduced immediately downstream the  
293 start codon of NSm and the construct designated MR<sub>(-)eGFP&NSmMut</sub> (Fig. 4A). When  
294 the MR<sub>(-)eGFP&NSmMut</sub> replicon was delivered and co-expressed with RdRp and N in *N.*  
295 *benthamiana* leaves, eGFP fluorescence was only detected in a single cells (Fig. 4B).  
296 As expected, Western immunoblot analysis confirmed the production of eGFP protein  
297 in leaves containing the MR<sub>(-)eGFP&NSmMut</sub> replicon, and in significantly lower amounts  
298 compared to the MR<sub>(-)eGFP</sub> replicon (Fig. 4C).

299

300 **Establishment of the systemic infection of M<sub>(-)</sub>- and S<sub>(+)</sub>-mini-replicon reporters**  
301 **by co-expression of full-length antigenomic L<sub>(+)</sub> in *N. benthamiana***

302 With the establishment of S (g/ag)RNA-based mini-replicon systems, and a  
303 movement-competent M gRNA-based mini-replicon, we set out to construct full  
304 length genomic cDNA clones of L<sub>(-)</sub>, M<sub>(-)</sub> and S<sub>(-)</sub>, flanked by HH and HDV at 5'- and  
305 3'-terminus, as a first step towards the rescue of TSWV entirely from cDNA clones.  
306 At the same time, similar constructs were made for the anti-genomic L<sub>(+)</sub>, M<sub>(+)</sub> and  
307 S<sub>(+)</sub>. However, attempts to recover infectious TSWV from *N. benthamiana* after  
308 agrobacterium-mediated delivery of all binary expression constructs of L<sub>(-)</sub>, M<sub>(-)</sub>, S<sub>(-)</sub>

309 together with N, RdRp and four VSRs, but also with the anti-genomic L<sub>(+)</sub>, M<sub>(+)</sub> and  
310 S<sub>(+)</sub> constructs, all failed (Table 1).

311 Since MR<sub>(-)eGFP</sub> was earlier shown to be movement competent, it was next  
312 investigated whether the M<sub>(-)</sub> and S<sub>(-)</sub>-minigenomes moved into the same plant cell in  
313 the presence of both RdRp and N. Upon co-expression of MR<sub>(-)mCherry</sub>, SR<sub>(-)eGFP</sub>, RdRp  
314 and N in *N. benthamiana* leaves, expression of both mCherry and eGFP from the  
315 MR<sub>(-)mCherry</sub> and SR<sub>(-)eGFP</sub> mini-replicons, respectively, could be discerned. However,  
316 the foci of mCherry fluorescence were separate from those showing eGFP  
317 fluorescence (Fig. S4). Previously, ectopic expression of Tobacco crinkle virus (TCV)  
318 RdRp was reported to cause superinfection exclusion, and prevented the entry of  
319 progeny virus into the original cell expressing the RdRp (47). Ectopic expression of  
320 TSWV RdRp and N would possibly cause superinfection exclusions and block  
321 intercellular movement of SR<sub>(-)eGFP</sub> into cells containing MR<sub>(-)mCherry</sub>. To avoid that, a  
322 new strategy was employed in which RdRp and N were expressed from viral agRNAs.  
323 To this end, a construct was made of the full-length L agRNA containing the  
324 optimized RdRp and flanked by the HH and HDV ribozymes, denoted L<sub>(+)opt</sub> (Fig. 5A).  
325 To test the expression and functionality of RdRp from this construct, L<sub>(+)opt</sub> was  
326 co-expressed with the SR<sub>(-)mCherry&eGFP</sub> mini-replicon, N and VSRs in *N. benthamiana*  
327 leaves. The results showed clear eGFP and mCherry fluorescence and indicated that  
328 L<sub>(+)opt</sub> was able to support SR<sub>(-)mCherry&eGFP</sub> transcription and replication (Fig. S5A).  
329 Furthermore, L<sub>(+)opt</sub> was also able to support the replication and transcription of the  
330 SR<sub>(+)eGFP</sub> mini-replicon, without the additional ectopic expression of N (Fig. S5B),

331 and of the movement competent MR<sub>(-)eGFP</sub> (Fig. S5C).

332 In a next experiment L<sub>(+)opt</sub> was co-expressed with MR<sub>(-)mCherry</sub>, SR<sub>(+)eGFP</sub> and four  
333 VSRs in *N. benthamiana* and plants analyzed for a systemic infection (Fig. 5A). At 6  
334 dpi, mCherry and eGFP fluorescence were detected in the locally agroinfiltrated *N.*  
335 *benthamiana* leaves and in which some foci were found to express mCherry and eGFP  
336 together (Fig. S6A). At 15 dpi, necrotic symptoms became visual in systemic leaves of  
337 *N. benthamiana* (Fig. 5B, a and c). Using a handheld UV lamp, a clear eGFP  
338 fluorescence was also observed in those leaves (Fig. 5B, b and d). The eGFP signal  
339 was detected in 24 out of 30 agro-infiltrated *N. benthamiana* plants (Table 1). Both  
340 eGFP and mCherry fluorescence were detected in veins/stems and systemic leaves  
341 under a fluorescence microscope (Fig. 5B, e). The systemic infection of *N.*  
342 *benthamiana* with SR<sub>(+)eGFP</sub>, MR<sub>(-)mCherry</sub> and L<sub>(+)opt</sub> was further confirmed by RT-PCR  
343 analysis (Fig. S6B).

344

#### 345 **Recovery of infectious TSWV from the full-length cDNA clones**

346 Based on the establishment of a systemic infection after *Agrobacterium*-mediated  
347 delivery of replicons SR<sub>(+)eGFP</sub>, MR<sub>(-)mCherry</sub> and L<sub>(+)opt</sub>, we next generated a full-length  
348 construct for S agRNA without any reporter gene, designated as S<sub>(+)</sub> and co-expressed  
349 it with replicon constructs L<sub>(+)opt</sub>, M<sub>(-)</sub> and four VSRs in *N. benthamiana* leaves.  
350 However, and surprisingly, no infectious TSWV was recovered from systemic leaves  
351 of *N. benthamiana* that were infiltrated with these constructs (Table 1). To find out  
352 whether this was due to failure of S<sub>(+)</sub>, we next examined whether S<sub>(+)</sub> was able to



353 establish a systemic infection in combination with the functional  $MR_{(-)eGFP}$  and  $L_{(+)\text{opt}}$   
354 constructs. When  $L_{(+)\text{opt}}$ ,  $MR_{(-)eGFP}$ ,  $S_{(+)}$  and three VSRs (P19-HcPro- $\gamma$ b) were  
355 co-expressed in *N. benthamiana* leaves, eGFP fluorescence was visible at 18 dpi in  
356 systemic leaves of *N. benthamiana*, although not as efficient as in the case with the  
357  $SR_{(+)\text{eGFP}}$  replicon, since only 7 out of 60 plants showed systemic infection (Fig. 5D  
358 and Table 1). RT-PCR analysis confirmed the systemic infection with  $S_{(+)}$ ,  $MR_{(-)eGFP}$   
359 and  $L_{(+)\text{opt}}$  in those *N. benthamiana* (Fig. S6C). When  $L_{(+)\text{opt}}$ ,  $MR_{(-)eGFP}$  and  $S_{(+)}$  were  
360 co-expressed with four VSRs (P19-HcPro- $\gamma$ b and NSs) in *N. benthamiana* leaves,  
361 intriguingly, no eGFP fluorescence was observed in the systemic leaves (Table 1)  
362 suggesting that ectopic expression of NSs interfered with the rescue of virus from full  
363 length  $S_{(+)}$ ,  $MR_{(-)eGFP}$  and  $L_{(+)\text{opt}}$ .

364 Next, we tested the rescuing of virus from full length  $M_{(-)}$ ,  $SR_{(+)\text{eGFP}}$  and  $L_{(+)\text{opt}}$ . To  
365 this end, the constructs of  $L_{(+)\text{opt}}$ ,  $M_{(-)}$  and  $SR_{(+)\text{eGFP}}$  were delivered and co-expressed  
366 in *N. benthamiana* in the presence of either four (P19-HcPro- $\gamma$ b+NSs) or three  
367 (P19-HcPro- $\gamma$ b) VSRs. The results showed no eGFP fluorescence in systemic leaves  
368 of *N. benthamiana* at 15-50 dpi, indicating that  $M_{(-)}$  was not able to complement and  
369 rescue the  $S_{(+)}$ -mini-replicons into systemic leaves (Table 1). Northern blot analysis  
370 showed that neither gRNAs nor agRNAs were detected for  $M_{(-)}$  while, in contrast,  
371 gRNAs and agRNAs were detected for  $S_{(+)}$  (Fig. S7A and B). Earlier, the  $MR_{(-)eGFP}$   
372 mini-replicon was shown to replicate and transcribe (Fig. 4D). The only difference  
373 between  $M_{(-)}$  and  $MR_{(-)eGFP}$  mini-replicon was the GP gene, which was exchanged for  
374 eGFP in the second construct. Considering that primary  $M_{(-)}$  transcripts were

375 produced in the nucleus by the 35S promoter, and putative splice sites were also  
376 predicted in the GP sequence (*SI Appendix, Table S2*), it was likely that primary M<sub>(-)</sub>  
377 transcripts were prone to splicing before sufficient replication of the mini-replicon  
378 and transcriptional-translational expression of the cell-to-cell movement protein gene  
379 could take place. For this reason, codon optimization was performed on the GP gene  
380 sequence in M<sub>(-)</sub>, leading to a new construct designated as M<sub>(-)opt</sub> (*Fig. 5A*). Upon  
381 co-expression of L<sub>(+)opt</sub>, M<sub>(-)opt</sub> and the SR<sub>(+)eGFP</sub> mini-replicon in *N. benthamiana*  
382 eGFP fluorescence was observed in systemic leaves (*Fig. 5C*). Fluorescence was  
383 observed in 27 out of 30 agroinfiltrated plants, and demonstrated that M<sub>(-)opt</sub>  
384 produced a functional and stable M genomic RNA, able to replicate and support  
385 systemic movement of S and L RNP molecules by its encoded NSm protein (*Table 1*).  
386 RT-PCR analysis further confirmed a systemic infection of *N. benthamiana* with  
387 SR<sub>(+)eGFP</sub>, M<sub>(-)opt</sub> and L<sub>(+)opt</sub> (*Fig. S6D*).

388 In a final experiment, aiming to rescue “wild type” TSWV entirely from cDNA  
389 clones, the binary constructs of L<sub>(+)opt</sub>, M<sub>(-)opt</sub> and S<sub>(+)</sub> were agroinfiltrated into *N.*  
390 *benthamiana* leaves together with three VSRs (P19-HcPro- $\gamma$ b). At 19 dpi, typical leaf  
391 curling was observed in systemic leaves from *N. benthamiana* plants (*Fig. 6A and*  
392 *Table 1*). Upon disease progression, plants started to exhibit a stunted phenotype  
393 between 19-30 dpi. When the experiment was repeated with a large batch of plants, a  
394 systemic infection was observed in 6 out of 60 plants (*Table 1*). Northern blot  
395 analyses on samples collected from systemically infected leaves showed the presence  
396 of gRNA and agRNA of S, M and L RNA segments (*Fig. 6B*), which was also

397 confirmed by RT-PCR (Fig. S8). Moreover, sequence analysis of the amplicons  
398 derived from the L and M RNA confirmed the presence of codon optimized RdRp and  
399 GP gene sequences (Fig. 6C). Immunoblot analysis on systemically infected leaf  
400 samples showed the presence of N, NSs, NSm, Gn and Gc proteins *N. benthamiana*  
401 (Fig. 6D), altogether indicating a successful systemic infection with rescued TSWV  
402 (rTSWV).

403 To demonstrate genuine virus particle rescue of rTSWV, samples were collected  
404 from newly infected systemic leaf tissues and subjected to transmission electron  
405 microscopy. As shown in Fig. 6E, typical enveloped and spherical virus particles were  
406 observed in rTSWV-infected tissue, altogether indicating that infectious TSWV  
407 (rTSWV) was successfully rescued from full-length cDNA clones of L<sup>(+)opt</sup>, M<sup>(-)opt</sup> and  
408 S<sup>(+)</sup>.

409

## 410 Discussion

411 The establishment of a reverse genetics system for a segmented NSV basically  
412 requires two steps. The first one involves the *in vivo* reconstitution of transcriptionally  
413 active RNPs, often managed by development of a mini-genome replication system.  
414 The second step involves virus rescue entirely from full-length "infectious" cDNA  
415 clones, based on tools developed and optimized with the mini-genome replication  
416 system. In this study, we first successfully reconstituted infectious RNPs based on  
417 TSWV S<sup>(-)</sup>-gRNA and S<sup>(+)</sup>-agRNA after having optimized the sequence of RdRp.  
418 Next, a movement competent mini-genome replication system was developed based

419 on M<sub>(-)</sub>-gRNA, which was also able to complement and systemically rescue  
420 reconstituted S RNPs. In a third step, full length constructs were made for  
421 S<sub>(+)eGFP</sub>-agRNA, M<sub>(-)mCherry</sub>-gRNA and L<sub>(+)</sub>-agRNA, to directly accommodate for  
422 translation of (small amounts of) all three genomic (35S) transcripts into N, NSm and  
423 RdRp proteins, respectively, and leave out the additional need of ectopically  
424 expressed N and RdRp. *Agrobacterium*-mediated delivery of these constructs lead to a  
425 successful systemic infection of *N. benthamiana* with rTSWV carrying eGFP  
426 reporters. In a last step, the GP gene sequence of M<sub>(-)</sub> was optimized, that allowed the  
427 final rescuing of infectious rTSWV particles entirely from full-length cDNA clones in  
428 *N. benthamiana*.

429 The genomic RNAs of segmented NSVs possess neither a 5' cap-structure nor  
430 3'-poly(A) tail (2, 48). Instead, their termini contain highly conserved sequences that  
431 show inverted sequence complementary and fold into a panhandle structure with a  
432 major role in RNA transcription and replication. Any additional nucleotide residues at  
433 those termini in the past have been shown to disrupt/affect transcription-replication of  
434 animal-infecting segmented NSVs (49). For this reason, the choice of plant promoter  
435 to generate the first primary full-length genomic RNA templates (mimicking authentic  
436 genomic RNA molecules) for initiating viral replication is one of the major and  
437 critical factors for the construction of a reverse genetics system for TSWV. For  
438 animal-infecting segmented NSVs, researchers in the past have been using various  
439 systems. One of the first strategies employed bacteriophage T7 promoter constructs  
440 co-expressed with a T7 RNA polymerase and later followed by the use RNA

441 polymerase I (Pol I) promoter constructs to generate the initial viral genome length  
442 RNA transcripts in mammalian cells (39, 40, 50-52). Unfortunately, attempts to  
443 establish the TSWV mini-replicon system based on the T7 promoter and T7 RNA  
444 polymerase strategy was unsuccessful (Fig. S1A, C and D). The activity of the Pol I  
445 promoter was shown to be species-dependent (53). Although a Pol I promoter has  
446 been reported from *Arabidopsis* (54, 55), while the transcription initiation +1 site is  
447 still not known. For *N. benthamiana* no Pol I promoter has been characterized yet.  
448 The 35S promoter, an RNA Pol II promoter, is well characterized and hence remains  
449 the only choice to establish a reverse genetics system for TSWV in plants. This is be  
450 in contrast to reverse genetics of segmented NSVs in animal cells, where all viruses  
451 have been reconstituted after T7/Pol I driven production of primary viral RNA  
452 templates for replication. The Pol II promoter has been used to produce the initial  
453 viral RNA transcripts of an animal-infecting nonsegmented NSV (56). Recently, the  
454 35S/Pol II promoter was also successfully employed to produce primary viral RNA  
455 template of the first non-segmented plant NSV reconstituted, the SYNIV rhabdovirus  
456 (42, 43). Here, we successfully deployed the 35S/Pol II promoter and two ribozymes  
457 at 5' and 3' ends of viral RNA sequences, to generate full length viral RNA transcripts  
458 that are recognized as initial/"authentic" RNA templates for TSWV replication and  
459 transcription by viral N and RdRp.

460 Besides the right promoter, the RdRp protein may present another bottleneck for  
461 the establishment of a reverse genetics system. Tospoviruses code for a single,  
462 unprocessed ~330 kDa RdRp from the 8.9 kb-sized L RNA (17, 18). The RdRp gene

463 sequence of TSWV was predicted to contain numerous intron splicing sites (*SI*  
464 *Appendix, Table S1*). Since the first animal segmented negative strand RNA virus was  
465 rescued in 1996 (39), numerous groups worldwide have attempted to construct a  
466 reverse genetics system for a tospovirus in plants. Here, it is shown that codon  
467 optimization and removal of potential intron splicing sites have been crucial for the  
468 expression of a functional RdRp of tospovirus from 35S-driven constructs *in planta*  
469 (*Fig. 1B*). While codon optimization may have contributed to increased protein  
470 expression levels, removal of predicted potential intron splicing sites from the RdRp  
471 genemay have helped to further stabilize and increase expression levels. After all,  
472 TSWV is known to replicate in the cytoplasm (2, 48), and its RdRp gene may not  
473 have been evolved to escape from the nuclear (pre-mRNA) splicing machinery.  
474 However, after nuclear transcription of the RdRp gene by the 35S promoter, any  
475 intron splicing site in the wild type RdRp transcript could thus be spliced and result in  
476 a truncated, non-functional RdRp.

477 Not only for RdRp, but also an optimized GP gene sequence turned out to be  
478 crucial to rescue a full length M RNA-based transcriptionally active RNP. Whereas  
479 the  $M_{(-)mCherry}$  mini-replicon was able to establish a systemic infection in *N.*  
480 *benthamiana* when co-expressed with  $S_{(+)\epsilon GFP}$  mini-replicon and  $L_{(+)\text{opt}}$ , the wild type  
481 full length M segment did not. Like in the case with the RdRp gene sequence, the GP  
482 gene sequence of TSWV was also predicted to contain numerous intron splicing sites  
483 (*SI Appendix, Table S2*). The absence of antigenomic and genomic RNA strands from  
484 the wild type full length M replicon on Northern blots (*Fig. S7B*) indicated the

485 possibility that primary transcripts could have been prone to splicing in the GP  
486 sequence. This would not only lead to a loss of genome length RNA molecules, but  
487 also inhibit the production of NSm protein (either from direct translation of the  
488 primary M transcript, or after secondary transcription of NSm mRNA), needed for  
489 cell-to-cell and systemic movement of viral RNPs.

490 Not only the wild type sequence of L and M RNA segments may be spliced in the  
491 nucleus, also the S RNA segment generated by the 35S promoter could be prone to  
492 splicing. This is supported by the experiments in which *N. benthamiana* where  
493 infiltrated with the S<sub>(+)eGFP</sub> mini-replicon, M<sub>(-)opt</sub> and L<sub>(+)opt</sub> and resulted in 80% virus  
494 recovery (Table 1), but when only the S<sub>(+)eGFP</sub> mini-replicon was exchanged for the  
495 full length S<sub>(+)</sub> virus recovery dropped to 11.37 %. The very same reason may explain  
496 the low infection rate (10 %) when full length S<sub>(+)</sub>, M<sub>(-)opt</sub> and L<sub>(+)opt</sub> are co-expressed  
497 (Table 1). Although this could be due to the splicing of S RNA, the (residual) levels of  
498 full length S produced apparently have been sufficient to initiate viral replication.

499 Similar to other bunyaviruses (39, 52, 57), both the RdRp and N proteins are  
500 required for reconstitution of infectious RNPs complexes for TSWV (Fig 1C).  
501 However, high expression of either N or RdRp results in cell death and cause negative  
502 effects on the replication and transcription of TSWV. Moreover, ectopic expression of  
503 N and RdRp by the strong 35S promoter also seems to cause superinfection exclusion,  
504 as earlier observed and reported with various viruses infecting humans, animals, and  
505 plants (47, 58-60). During superinfection exclusion a preexisting infection of virus  
506 prevents a secondary infection with the same or a highly similar virus. It is an active

507 virus-controlled process that may be determined by a specific viral protein. For  
508 example, for potyvirus the coat protein and NIa protease have been identified to  
509 control superinfection exclusion (60). For TCV, the p28, involved in replication  
510 protein, was shown to confer superinfection exclusion as *a priori* expression of p28  
511 blocked (re-)infection with TCV (47). Ectopic expression of N and RdRp may also  
512 have blocked progeny L-, M- and S- RNAs from moving into neighboring plant cells.  
513 However, the presence of L-, M- and S- RNA segments in the same cells is a  
514 pre-requisite for the reconstitution of infectious TSWV and to systemic spread in *N.*  
515 *benthamiana*. Fortunately, direct expression of N from S<sub>(+)</sub> and RdRp from L<sub>(+)opt</sub> have  
516 helped to overcome superinfection exclusion and to recover infectious TSWV.  
517 Whether this is due to the fact that N and RdRp are directly expressed from primary  
518 viral genome transcripts and simultaneously associate to progeny L-, M- and S- RNA  
519 segments in the same plant cells into infectious RNPs and/or involves a more  
520 fine-tuned protein expression relative to RNA segment replication remains unclear.  
521 Ectopic expression of NSs also inhibited the rescue of full length S<sub>(+)</sub> segment from  
522 cDNA. Since TSWV NSs significantly enhanced the replication of S and M  
523 mini-replicons lacking the NSs ORF, this indicated that the inhibition could relate to  
524 (simultaneous / *a priori*) ectopic expression of NSs gene sequences with overlap to  
525 the full length S<sub>(+)</sub> replicon. This could be tested by ectopic expression of an  
526 untranslatable NSs<sup>ΔATG</sup> construct.

527 In summary, a series of issues has hampered the construction of a successful  
528 TSWV reverse genetics system: the choice of promoter and construct design to



529 generate primary viral RNA transcripts in plants that mimick authentic viral RNA  
530 molecules, the expression of a very large viral RdRp, negative effects of ectopic  
531 expression of RdRp, N and NSs, and the absence of viral RNA synthesis of the wild  
532 type M<sub>(-)</sub> segment. In this study, we have been able to solve all these issues and  
533 successfully managed to establish a reverse genetics system for the tripartite RNA  
534 genome of TSWV. Using the S RNA mini-replicon system containing eGFP and  
535 mCherry reporter genes, the role of *cis*- and *trans*-acting elements for viral replication  
536 and transcription can be studied. Using the M-RNA mini-replicon system cell-to-cell  
537 movement of TSWV RNPs *in planta* can be studied. To track the virus during  
538 systemic infection of plants rTSWV can be generated containing fluorescent reporter  
539 genes at the genetic loci of either GP or NSs. The establishment of this RG system  
540 now provides us with a new and powerful platform to generate mutant viruses and  
541 study their disease pathology in a natural setting, including basic principles of all  
542 tospovirus life cycle and viral pathogenicity. As a personal communication, Jeanmarie  
543 Verchot's group has also recovered the Rose rosette emaravirus entirely from cDNA  
544 clones, a plant NSV with 7 RNA segments. The establishment of these RG systems  
545 presents the start of a new research era for the segmented plant NSVs.

546

## 547 **Materials and Methods**

548 Details of the methodology used are provided in [SI Appendix, Materials and Methods](#),  
549 and include plasmid construction, plant material and growth conditions,  
550 agro-infiltration, immunoblot analysis, Northern blot analysis, RT-PCR, GFP imaging,

551 fluorescence microscopy and Electron microscopy. Primers used in this study are  
552 listed in *SI Appendix, Table S3*.

553

## 554 **ACKNOWLEDGMENTS**

555 We thank Dr. Yi Xu for critical review of this manuscript. This work was supported by  
556 the National Natural Science Foundation of China (31630062 and 31471746), the  
557 Fundamental Research Funds for the Central Universities (JCQY201904), Youth  
558 Science and Technology Innovation Program to XT and Postgraduate Research &  
559 Practice Innovation Program of Jiangsu Province to MF.

560

## 561 **References**

- 562 1. Fields BN, Knipe, DM, & Howley, PM (1996) *Fields Virology* (Lippincott-Raven, New York).
- 563 2. Elliott RM, Blakqori G (2011) Molecular biology of orthobunyaviruses. In: Plyusnin, A,  
564 Elliott, RM (Eds.), *The Bunyaviridae: molecular and cellular biology. Horizon Scientific Press,*  
565 *Norwich, UK.*
- 566 3. German TL, Ullman DE, & Moyer JW (1992) Tospoviruses: diagnosis, molecular biology,  
567 phylogeny, and vector relationships. *Annu Rev Phytopathol* 30:315-348.
- 568 4. Kong L, Wu J, Lu L, Xu Y, & Zhou X (2014) Interaction between rice stripe virus  
569 disease-specific protein and host PsbP enhances virus symptoms. *Mol Plant* 7(4):691-708.
- 570 5. Lu G, *et al.* (2019) Tenuivirus utilizes its glycoprotein as a helper component to overcome  
571 insect midgut barriers for its circulative and propagative transmission. *PLoS Pathog*  
572 15(3):e1007655.
- 573 6. Oliver JE & Whitfield AE (2016) The genus tospovirus: emerging bunyaviruses that threaten  
574 food security. *Annu Rev Virol* 3(1):101-124.
- 575 7. Prins M & Goldbach R (1998) The emerging problem of tospovirus infection and  
576 nonconventional methods of control. *Trends Microbiol* 6(1):31-35.
- 577 8. Turina M, Kormelink R, & Resende RO (2016) Resistance to tospoviruses in vegetable crops:  
578 epidemiological and molecular aspects. *Annu Rev Phytopathol* 54:347-371.
- 579 9. Whitfield AE, Ullman DE, & German TL (2005) Tospovirus-thrips interactions. *Annu Rev*  
580 *Phytopathol* 43:459-489.
- 581 10. Zhu M, van Grinsven IL, Kormelink R, & Tao X (2019) Paving the way to tospovirus  
582 infection: multilined interplays with plant innate immunity. *Annu Rev Phytopathol*  
583 57:2.1-2.22.

- 584 11. Kormelink R, Garcia ML, Goodin M, Sasaya T, & Haenni AL (2011) Negative-strand RNA  
585 viruses: the plant-infecting counterparts. *Virus Res* 162(1-2):184-202.
- 586 12. Scholthof KB, *et al.* (2011) Top 10 plant viruses in molecular plant pathology. *Mol Plant*  
587 *Pathol* 12(9):938-954.
- 588 13. Adams MJ, *et al.* (2017) Changes to taxonomy and the international code of virus  
589 classification and nomenclature ratified by the international committee on taxonomy of  
590 viruses. *Arch Virol* 162(8):2505-2538.
- 591 14. Pappu HR, Jones RA, & Jain RK (2009) Global status of tospovirus epidemics in diverse  
592 cropping systems: successes achieved and challenges ahead. *Virus Res* 141(2):219-236.
- 593 15. Hogenhout SA, Ammar el D, Whitfield AE, & Redinbaugh MG (2008) Insect vector  
594 interactions with persistently transmitted viruses. *Annu Rev Phytopathol* 46:327-359.
- 595 16. Gilbertson RL, Batuman O, Webster CG, & Adkins S (2015) Role of the insect superectors  
596 Bemisia tabaci and Frankliniella occidentalis in the emergence and global spread of plant  
597 viruses. *Annu Rev Virol* 2(1):67-93.
- 598 17. Adkins S, Quadt R, Choi TJ, Ahlquist P, & German T (1995) An RNA-dependent RNA  
599 polymerase activity associated with virions of tomato spotted wilt virus, a plant- and  
600 insect-infecting bunyavirus. *Virology* 207(1):308-311.
- 601 18. de Haan P, *et al.* (1991) Tomato spotted wilt virus L RNA encodes a putative RNA polymerase.  
602 *J Gen Virol* 72 ( Pt 9):2207-2216.
- 603 19. Kikkert M, *et al.* (1999) Tomato spotted wilt virus particle morphogenesis in plant cells. *J*  
604 *Virol* 73(3):2288-2297.
- 605 20. Ribeiro D, *et al.* (2008) Tomato spotted wilt virus glycoproteins induce the formation of  
606 endoplasmic reticulum- and Golgi-derived pleomorphic membrane structures in plant cells. *J*  
607 *Gen Virol* 89(Pt 8):1811-1818.
- 608 21. Sin SH, McNulty BC, Kennedy GG, & Moyer JW (2005) Viral genetic determinants for thrips  
609 transmission of tomato spotted wilt virus. *Proc Natl Acad Sci U S A* 102(14):5168-5173.
- 610 22. Feng Z, *et al.* (2016) The ER-membrane transport system is critical for intercellular trafficking  
611 of the NSm movement protein and tomato spotted wilt tospovirus. *PLoS Pathog*  
612 12(2):e1005443.
- 613 23. Kormelink R, Storms M, Van Lent J, Peters D, & Goldbach R (1994) Expression and  
614 subcellular location of the NSm protein of tomato spotted wilt virus (TSWV), a putative viral  
615 movement protein. *Virology* 200(1):56-65.
- 616 24. Soellick T, Uhrig JF, Bucher GL, Kellmann JW, & Schreier PH (2000) The movement protein  
617 NSm of tomato spotted wilt tospovirus (TSWV): RNA binding, interaction with the TSWV N  
618 protein, and identification of interacting plant proteins. *Proc Natl Acad Sci U S A*  
619 97(5):2373-2378.
- 620 25. Storms MM, Kormelink R, Peters D, Van Lent JW, & Goldbach RW (1995) The nonstructural  
621 NSm protein of tomato spotted wilt virus induces tubular structures in plant and insect cells.  
622 *Virology* 214(2):485-493.
- 623 26. Storms MM, *et al.* (1998) A comparison of two methods of microinjection for assessing  
624 altered plasmodesmal gating in tissues expressing viral movement proteins. *Plant J*  
625 13(1):131-140.
- 626 27. Li J, *et al.* (2015) Structure and function analysis of nucleocapsid protein of tomato spotted  
627 wilt virus interacting with RNA using homology modeling. *J Biol Chem* 290(7):3950-3961.

- 628 28. Komoda K, Narita M, Yamashita K, Tanaka I, & Yao M (2017) Asymmetric trimeric ring  
629 structure of the nucleocapsid protein of tospovirus. *J Virol* 91(20):e01002-17.
- 630 29. Guo Y, *et al.* (2017) Distinct mechanism for the formation of the ribonucleoprotein complex  
631 of tomato spotted wilt virus. *J Virol* 91(23):e00892-17.
- 632 30. Feng Z, *et al.* (2013) Nucleocapsid of tomato spotted wilt tospovirus forms mobile particles  
633 that traffic on an actin/endoplasmic reticulum network driven by myosin XI-K. *New Phytol*  
634 200(4):1212-1224.
- 635 31. Ribeiro D, *et al.* (2013) The cytosolic nucleoprotein of the plant-infecting bunyavirus tomato  
636 spotted wilt recruits endoplasmic reticulum-resident proteins to endoplasmic reticulum export  
637 sites. *Plant Cell* 25(9):3602-3614.
- 638 32. Bucher E, Sijen T, De Haan P, Goldbach R, & Prins M (2003) Negative-strand tospoviruses  
639 and tenuiviruses carry a gene for a suppressor of gene silencing at analogous genomic  
640 positions. *J Virol* 77(2):1329-1336.
- 641 33. Schnettler E, *et al.* (2010) Diverging affinity of tospovirus RNA silencing suppressor proteins,  
642 NSs, for various RNA duplex molecules. *J Virol* 84(21):11542-11554.
- 643 34. Takeda A, *et al.* (2002) Identification of a novel RNA silencing suppressor, NSs protein of  
644 tomato spotted wilt virus. *FEBS Lett* 532(1-2):75-79.
- 645 35. Hoang NH, Yang HB, & Kang BC (2013) Identification and inheritance of a new source of  
646 resistance against tomato spotted wilt virus (TSWV) in Capsicum. *Sci Hortic-Amsterdam*  
647 161:8-14.
- 648 36. de Ronde D, *et al.* (2014) Analysis of tomato spotted wilt virus NSs protein indicates the  
649 importance of the N-terminal domain for avirulence and RNA silencing suppression. *Mol*  
650 *Plant Pathol* 15(2):185-195.
- 651 37. Kim SB, *et al.* (2017) Divergent evolution of multiple virus-resistance genes from a  
652 progenitor in Capsicum spp. *New Phytol* 213(2):886-899.
- 653 38. Brittlebank CC (1919) Tomato diseases. *J Agri Victoria* 27:231-235.
- 654 39. Bridgen A & Elliott RM (1996) Rescue of a segmented negative-strand RNA virus entirely  
655 from cloned complementary DNAs. *Proc Natl Acad Sci U S A* 93(26):15400-15404.
- 656 40. Neumann G, *et al.* (1999) Generation of influenza A viruses entirely from cloned cDNAs.  
657 *Proc Natl Acad Sci U S A* 96(16):9345-9350.
- 658 41. Flatz L, Bergthaler A, de la Torre JC, & Pinschewer DD (2006) Recovery of an arenavirus  
659 entirely from RNA polymerase I/II-driven cDNA. *Proc Natl Acad Sci U S A*  
660 103(12):4663-4668.
- 661 42. Ganesan U, *et al.* (2013) Construction of a sonchus yellow net virus mini-replicon: a step  
662 toward reverse genetic analysis of plant negative-strand RNA viruses. *J Virol*  
663 87(19):10598-10611.
- 664 43. Wang Q, *et al.* (2015) Rescue of a plant negative-strand RNA virus from cloned cDNA:  
665 insights into enveloped plant virus movement and morphogenesis. *PLoS Pathog*  
666 11(10):e1005223.
- 667 44. Ishibashi K, Matsumoto-Yokoyama E, & Ishikawa M (2017) A tomato spotted wilt virus S  
668 RNA-based replicon system in yeast. *Sci Rep* 7(1):12647.
- 669 45. van Knippenberg I, Goldbach R, & Kormelink R (2005) Tomato spotted wilt virus S-segment  
670 mRNAs have overlapping 3'-ends containing a predicted stem-loop structure and conserved  
671 sequence motif. *Virus Res* 110(1-2):125-131.

- 672 46. de Haan P, Wagemakers L, Peters D, & Goldbach R (1990) The S RNA segment of tomato  
673 spotted wilt virus has an ambisense character. *J Gen Virol* 71 ( Pt 5):1001-1007.
- 674 47. Zhang XF, *et al.* (2017) A self-perpetuating repressive state of a viral replication protein  
675 blocks superinfection by the same virus. *PLoS Pathog* 13(3):e1006253.
- 676 48. Elliott RM (2014) Orthobunyaviruses: recent genetic and structural insights. *Nat Rev*  
677 *Microbiol* 12(10):673-685.
- 678 49. Ferron F, Weber F, de la Torre JC, & Reguera J (2017) Transcription and replication  
679 mechanisms of bunyaviridae and arenaviridae L proteins. *Virus Res* 234:118-134.
- 680 50. Blakqori G & Weber F (2005) Efficient cDNA-based rescue of La Crosse bunyaviruses  
681 expressing or lacking the nonstructural protein NSs. *J Virol* 79(16):10420-10428.
- 682 51. Ikegami T, Won S, Peters CJ, & Makino S (2006) Rescue of infectious rift valley fever virus  
683 entirely from cDNA, analysis of virus lacking the NSs gene, and expression of a foreign gene.  
684 *J Virol* 80(6):2933-2940.
- 685 52. Flick R & Pettersson RF (2001) Reverse genetics system for uukuniemi virus (Bunyaviridae):  
686 RNA polymerase I-catalyzed expression of chimeric viral RNAs. *J Virol* 75(4):1643-1655.
- 687 53. Hempel WM, Cavanaugh AH, Hannan RD, Taylor L, & Rothblum LI (1996) The  
688 spezhucies-specific RNA polymerase I transcription factor SL-1 binds to upstream binding  
689 factor. *Mol Cell Biol* 16(2):557-563.
- 690 54. Doelling JH, Gaudino RJ, & Pikaard CS (1993) Functional analysis of Arabidopsis thaliana  
691 rRNA gene and spacer promoters in vivo and by transient expression. *Proc Natl Acad Sci U S*  
692 *A* 90(16):7528-7532.
- 693 55. SaezVasquez J & Pikaard CS (1997) Extensive purification of a putative RNA polymerase I  
694 holoenzyme from plants that accurately initiates rRNA gene transcription in vitro. *P Natl Acad*  
695 *Sci USA* 94(22):11869-11874.
- 696 56. Martin A, Staeheli P, & Schneider U (2006) RNA polymerase II-controlled expression of  
697 antigenomic RNA enhances the rescue efficacies of two different members of the  
698 Mononegavirales independently of the site of viral genome replication. *J Virol*  
699 80(12):5708-5715.
- 700 57. Flick R, Flick K, Feldmann H, & Elgh F (2003) Reverse genetics for crimean-congo  
701 hemorrhagic fever virus. *J Virol* 77(10):5997-6006.
- 702 58. Laliberte JP & Moss B (2014) A novel mode of poxvirus superinfection exclusion that  
703 prevents fusion of the lipid bilayers of viral and cellular membranes. *J Virol*  
704 88(17):9751-9768.
- 705 59. Webster B, Ott M, & Greene WC (2013) Evasion of superinfection exclusion and elimination  
706 of primary viral RNA by an adapted strain of hepatitis C virus. *J Virol* 87(24):13354-13369.
- 707 60. Tatineni S & French R (2016) The coat protein and NIa protease of two potyviridae family  
708 members independently confer superinfection exclusion. *J Virol* 90(23):10886-10905.

709

710

711

712

713

714 **Table 1.** Systemic infection rate of recombinant TSWV rescued in *N. benthamiana* in  
 715 the presence of viral suppressors of RNA silencing (VSRs).

| Antigenome and genome derivatives                                     | VSRs                    | Systemic infection<br>(No. of infected/inoculated plants) |
|-----------------------------------------------------------------------|-------------------------|-----------------------------------------------------------|
| S <sub>(-)</sub> +M <sub>(-)</sub> +L <sub>(-)</sub>                  | N+RdRp+NSs+P19-HcPro-γb | 0 % (0/30)                                                |
| S <sub>(+)</sub> +M <sub>(+)</sub> +L <sub>(+)</sub>                  | N+RdRp+NSs+P19-HcPro-γb | 0 % (0/30)                                                |
| SM <sub>(+)</sub> eGFP+MR <sub>(-)</sub> mCherry+L <sub>(+)</sub> opt | NSs+P19-HcPro-γb        | 80 % (24/30)                                              |
| S <sub>(+)</sub> +MR <sub>(-)</sub> eGFP+L <sub>(+)</sub> opt         | P19-HcPro-γb            | 11.37 % (7/60)                                            |
| S <sub>(+)</sub> +MR <sub>(-)</sub> eGFP+L <sub>(+)</sub> opt         | NSs+P19-HcPro-γb        | 0 % (0/60)                                                |
| SR <sub>(+)</sub> eGFP+M <sub>(-)</sub> +L <sub>(+)</sub> opt         | P19-HcPro-γb            | 0 % (0/60)                                                |
| SR <sub>(+)</sub> eGFP+M <sub>(-)</sub> +L <sub>(+)</sub> opt         | NSs+P19-HcPro-γb        | 0 % (0/60)                                                |
| SR <sub>(+)</sub> eGFP+M <sub>(-)</sub> opt+L <sub>(+)</sub> opt      | NSs+P19-HcPro-γb        | 90 % (27/30)                                              |
| S <sub>(+)</sub> +M <sub>(-)</sub> opt+L <sub>(+)</sub> opt           | P19-HcPro-γb            | 10 % (6/60)                                               |

716

717 Mixture of *Agrobacterium* cultures harboring the plasmids encoding each of the S, M, L and  
 718 derivatives (final concentration OD<sub>600</sub>=0.2), RdRp (OD<sub>600</sub>=0.2), N (OD<sub>600</sub>=0.2) and VSRs  
 719 (OD<sub>600</sub>=0.05) were infiltrated into *N. benthamiana* leaves. Systemic infection was scored  
 720 15-30 dpi.

721

722

723

724

725

726

727

728 **Figure Legends:**

729 **Fig. 1** Construction of a TSWV S<sub>(-)</sub> RNA-based mini-replicon system in *N.*  
730 *benthamiana*. (A) Schematic representation of binary constructs to express TSWV S<sub>(-)</sub>  
731 mini-replicon, TSWV N, RdRp and four RNA silencing suppressors (VSRs: NSs, P19,  
732 HcPro and  $\gamma$ b) proteins by agroinfiltration into *N. benthamiana*. The S<sub>(-)</sub>-gRNA of  
733 TSWV is shown on the top. SR<sub>(-)</sub>mCherry&eGFP: the NSs and N of S<sub>(-)</sub>-gRNA were  
734 replaced by mCherry and eGFP, respectively. (-) refers to the negative  
735 (genomic)-strand of S RNA; 2×35S: a double 35S promoter; HH: hammerhead  
736 ribozyme; RZ: Hepatitis Delta virus (HDV) ribozyme; NOS: nopaline synthase  
737 terminator. (B) Foci of eGFP and mCherry fluorescence in *N. benthamiana* leaves  
738 co-expressing SR<sub>(-)</sub>mCherry&eGFP, RdRp, N and four VSRs at 5 days post infiltration (dpi)  
739 under a fluorescence microscope. The bar represents 400  $\mu$ m. (C) Analysis of RdRp  
740 and N requirement for SR<sub>(-)</sub>mCherry&eGFP mini-genome replication in *N. benthamiana*  
741 leaves. SR<sub>(-)</sub>mCherry&eGFP was coexpressed with pCB301 empty vector (Vec), N, RdRp  
742 or both in *N. benthamiana* leaves by agroinfiltration. Agro-infiltrated leaves were  
743 examined and photographed at 5 dpi under a fluorescence microscope. Signal shown  
744 reflects a merge of mCherry and eGFP fluorescence from both reporter genes. Bar  
745 represents 400  $\mu$ m. (D) Immunoblot analysis on the expression of N and eGFP  
746 proteins in the leaves shown in panel (C) using specific antibodies against N and GFP,  
747 respectively. Ponceau S staining of rubisco large subunit is shown for protein loading  
748 control. (E) Northern blot analysis of S<sub>(-)</sub>-mini-replicon replication and transcription  
749 in the presence of N, RdRp or both in *N. benthamiana*. The S RNA genomic,



750 anti-genomic and subgenomic transcripts (eGFP mRNA) were detected by  
751 DIG-labeled sense eGFP or anti-sense eGFP probes. The red and blue arrows indicate  
752 the anti-genomic and genomic RNAs of SR<sub>(-)</sub>mCherry&eGFP, respectively. The green  
753 arrow indicates the eGFP mRNA transcript. Ethidium bromide staining of ribosomal  
754 RNA (rRNA) was used as RNA loading control.

755

756 **Fig. 2** Optimization of the SR<sub>(-)</sub>mCherry&eGFP mini-replicon system. (A) Optimizing the  
757 concentration of N and RdRp proteins for replication and transcription of  
758 SR<sub>(-)</sub>mCherry&eGFP in *N. benthamiana* leaves. Increasing amounts of *Agrobacterium*,  
759 from OD<sub>600</sub>= 0.2 to 0.8 and containing the binary expression constructs for N (upper  
760 panels) or RdRp (bottom panels), were mixed with fixed amounts of *Agrobacterium*  
761 containing the RdRp or N construct (OD<sub>600</sub> 0.2), respectively, and their effects on  
762 eGFP reporter expression were visualized under a fluorescence microscope at 5 dpi.  
763 Bars represent 400 μm. (B) and (C) Western immunoblot detection of the N and eGFP  
764 proteins expressed in the leaves shown in panel (A) using specific antibodies against  
765 N and GFP, respectively. (D) Optimization of RNA silencing suppressors (VSRs) on  
766 SR<sub>(-)</sub>mCherry&eGFP mini-reporter replication and transcriptions as measured by eGFP and  
767 mCherry expression. The SR<sub>(-)</sub>mCherry&eGFP, N and RdRp proteins were co-expressed  
768 with pCB301 empty vector (Vec), NSs, P19-HcPro-γb or all four VSRs in *N.*  
769 *benthamiana* leaves. Foci expressing eGFP and mCherry in agroinfiltrated leaves  
770 were visualized under a fluorescence microscope at 5 dpi. Bars represent 400 μm. (E)  
771 Western immunoblot detection of N and eGFP protein synthesis in the leaves shown



772 in panel (D) using N and GFP-specific antibodies, respectively. Ponceau S staining  
773 was used as protein loading control.

774

775 **Fig. 3** Development of the S<sub>(+)</sub>-agRNA mini-replicon system in *N. benthamiana*. (A)

776 Schematic representation of the TSWV SR<sub>(+)</sub>eGFP mini-replicon. The NSs gene of

777 TSWV S agRNA was replaced by eGFP. Anti-genomic RNA strands of the SR<sub>(+)</sub>eGFP

778 mini-replicon are transcribed from a double 35S promoter (2×35S), and flanked by a

779 HH ribozyme and HDV ribozyme (RZ) sequence. (+) refers to the positive

780 (antigenomic)-strand of S RNA. (B) Foci of eGFP fluorescence in *N. benthamiana*

781 leaves co-expressing TSWV SR<sub>(+)</sub>eGFP with pCB301 empty vector (Vec), N, RdRp or

782 N+RdRp by agroinfiltration. The agroinfiltrated leaves were photographed at 3 dpi

783 under a fluorescence microscope. Bars represent 400 μm. (C) Western immunoblot

784 detection of N and eGFP protein synthesis in the leaves shown in panel (B) using N-

785 and GFP-specific antibodies, respectively. Ponceau S staining was used as a protein

786 loading control. (D) Northern blot analysis of the replication and transcription of

787 SR<sub>(+)</sub>eGFP mini-replicon in *N. benthamiana* co-expressed with empty vector (Vec), N,

788 RdRp or both. The anti-genomic RNAs (red arrow), genomic RNAs (blue arrow) and

789 eGFP mRNA transcripts (green arrow) were detected with DIG-labeled sense and

790 anti-sense eGFP probes, respectively. Ethidium bromide staining was used as RNA

791 loading control.

792

793 **Fig. 4** Establishment of a TSWV M<sub>(-)</sub>-gRNA based mini-replicon system with

794 cell-to-cell movement competency in *N. benthamiana*. (A) Schematic representation  
795 of the TSWV MR<sub>(-)eGFP</sub> mini-replicon and its mutant derivative MR<sub>(-)eGFP&NSmMut</sub>. The  
796 GP gene of TSWV M<sub>(-)gRNA</sub> was substituted by eGFP. The genomic RNA of the  
797 mini-replicon is transcribed from a double 35S promoter (2×35S) and flanked by a  
798 Hammerhead (HH) ribozyme and HDV ribozyme (RZ). For MR<sub>(-)eGFP&NSmMut</sub>, a stop  
799 codon was introduced immediately after the start codon of the NSm gene in the  
800 MR<sub>(-)eGFP</sub> mini-replicon. (B) Foci of eGFP fluorescence expressed from the MR<sub>(-)eGFP</sub>  
801 or MR<sub>(-)eGFP&NSmMut</sub> mini-replicon in *N. benthamiana* leaves co-expressed with the  
802 empty vector (Vec), N, RdRp or N+RdRp by agroinfiltration. Agroinfiltrated leaves  
803 were photographed at 4 dpi under a fluorescence microscope. Bars represent 400 μm.  
804 (C) Western immunoblot detection of N and eGFP protein synthesis in the leaves  
805 shown in panel (B) with specific antibodies against N and GFP, respectively. Ponceau  
806 S staining was used as protein loading control. (D) Northern blot analysis of the  
807 replication and transcription of the MR<sub>(-)eGFP</sub> mini-replicon co-expressed with Vec, N,  
808 RdRp or N+RdRp in *N. benthamiana* leaves. The anti-genomic RNAs (red arrow),  
809 genomic RNAs (blue arrow) and eGFP mRNA transcripts (green arrow) were detected  
810 with DIG labeled sense and anti-sense eGFP probes, respectively. Ethidium bromide  
811 staining was used as RNA loading control.

812

813 **Fig. 5** Establishment of a systemic infection in *N. benthamiana* with replicons S<sub>(+)</sub> and  
814 M<sub>(-)</sub> co-expressed with full length antigenomic L<sub>(+)opt</sub>. (A) Schematic representation of  
815 constructs expressing TSWV full length antigenomic L<sub>(+)opt</sub> with optimized RdRp, full

816 length genomic  $M_{(-)opt}$  with optimized GP,  $MR_{(-)eGFP}$ ,  $MR_{(-)mCherry}$ , full length  
817 antigenomic  $S_{(+)}$  and  $SR_{(+)eGFP}$ . Primary viral RNA transcripts are transcribed from a  
818 double 35S promoter ( $2\times 35S$ ) and flanked by a HH and HDV ribozyme (RZ). (B)  
819 eGFP and mCherry fluorescence in *N. benthamiana* resulting from systemic infection  
820 of agroinfiltrated  $SR_{(+)eGFP}$ ,  $MR_{(-)mCherry}$  and  $L_{(+)opt}$  constructs. The systemic infected  
821 plants (a and b) and leaves (c and d) were photographed at 21 dpi under white light  
822 and (hand-held) ultraviolet (UV) light. Foci of eGFP and mCherry fluorescence in  
823 leaves shown in panel d as visualized under a fluorescence microscope. Bar represents  
824 400  $\mu$ m. (C) eGFP fluorescence in *N. benthamiana* resulting from systemic infection  
825 of agroinfiltrated  $SR_{(+)eGFP}$ ,  $M_{(-)opt}$  and  $L_{(+)opt}$  constructs. Infected plants (a and b) and  
826 leaves (c and d) were photographed at 18 dpi under white light and (hand-held) UV  
827 light, respectively. (D) eGFP fluorescence in *N. benthamiana* resulting from systemic  
828 infection of agroinfiltrated  $S_{(+)}$ ,  $MR_{(-)eGFP}$  and  $L_{(+)opt}$  constructs. Infected plants (a and  
829 b) and leaves (c and d) were photographed at 50 dpi under white light and (hand-held)  
830 UV light, respectively.

831

832 **Fig. 6** Rescue of infectious TSWV from full-length cDNA clones in *N. benthamiana*.

833 (A) Systemic infection of *N. benthamiana* plants with rescued TSWV (rTSWV)  
834 resulting from agroinfiltration of  $S_{(+)}$ ,  $M_{(-)opt}$  and  $L_{(+)opt}$  and three VSRs (P19, HcPro  
835 and  $\gamma$ b). The plant agroinfiltrated with pCB301 empty vector was used as a mock  
836 control. Images were taken at 19 dpi. Boxed areas of the plants that show stunting,  
837 mosaic and leaf curling are shown enlarged in the right panels. (B) Sequence

838 confirmation of codon optimized sequences of the GP gene (from the M<sub>(-)opt</sub> RNA  
839 segment) and the RdRp gene (from the L<sub>(+)opt</sub> RNA segment) on RT-PCR fragments  
840 obtained from systemic leaves of *N. benthamiana* infected with rTSWV. The  
841 optimized sequence of GP from rTSWV is underlined by a blue dashed line, and wild  
842 type GP sequence underlined in blue. The 3'-untranslated region (UTR) sequence of  
843 the M genomic RNA is marked with a yellow line. The optimized sequence of RdRp  
844 from rTSWV is underlined by a red dashed line, and wild type RdRp sequence  
845 underlined in red. The 3'-UTR sequence of the L genomic RNA is marked with a  
846 purple line. The stars indicate the codon optimization sites of GP and RdRp gene  
847 sequences. (C) Northern blot detection of viral RNA from the S, M and L RNA  
848 segment, respectively, in systemic leaves of *N. benthamiana* infected with rTSWV.  
849 The anti-genomic RNAs (red arrow) and genomic RNAs (blue arrow) were detected  
850 with DIG labeled sense and anti-sense NSs-, NSm- and L-5'UTR probes, respectively.  
851 Lane 1 and 2 refer to two independent replicates. Ethidium bromide staining was used  
852 as RNA loading control. (D) Western immunoblot detection of the N, NSm, NSs, Gc,  
853 and Gn proteins from leaves systemically infected with rTSWV, using specific  
854 antibodies against N, NSm, NSs, Gc, and Gn, respectively. Leaves infected with  
855 wild-type TSWV were used as a positive control. Ponceau S staining was used as  
856 protein loading control. (E) Electron micrographs of thin sections of *N. benthamiana*  
857 plants infected with rTSWV. Boxed regions in the left panels and showing the  
858 presence of virions, are shown enlarged in the right panels. Spherical enveloped virus  
859 particles are indicated (white arrow head). Bars represent 0.2  $\mu$ m.

860 **Supplemental Figure Legends**

861 **Fig. S1** Functional analysis of wild type RdRp and the use of T7 promoter in a  
862 mini-genome replication assay. (A) Schematic diagram of TSWV 35S:SR<sub>(-)</sub>mCherry&eGFP  
863 and T7:SR<sub>(-)</sub>mCherry&eGFP mini-replicon reporters. (B) The wild type RdRp (RdRp<sub>wt</sub>) or  
864 the empty vector (Vec) was co-expressed with 35S:SR<sub>(-)</sub>mCherry&eGFP, N, VSRs (VSRs:  
865 NSs, P19, HcPro and  $\gamma$ b) in *N. benthamiana* leaves. The expression of eGFP was  
866 examined by a fluorescence microscope. (C) Constructs coding for  
867 T7:SR<sub>(-)</sub>mCherry&eGFP, T7 RNA polymerase (pol), N and VSRs were co-expressed with  
868 RdRp<sub>wt</sub> or RdRp<sub>opt</sub> in *N. benthamiana* leaves. Replication of T7:SR<sub>(-)</sub>mCherry&eGFP was  
869 examined by monitoring for eGFP fluorescence with a fluorescence microscope.  
870 Empty vector (Vec) pCB301 was used as a negative control. Bars represent 200  $\mu$ m.  
871 (D) Western immunoblot detection of T7 RNA pol using a T7 RNA pol specific  
872 antibody. Ponceau S staining was used as protein loading control. Lane 1: sample  
873 from leaves co-expressing T7:SR<sub>(-)</sub>mCherry&eGFP, T7 RNA Pol, N, VSRs and RdRp<sub>wt</sub>;  
874 lane 2: sample from leaves co-expressing T7:SR<sub>(-)</sub>mCherry&eGFP, T7 RNA Pol, N, VSRs  
875 and RdRp<sub>opt</sub>.

876

877 **Fig. S2** Time course analysis on gene expression from the SR<sub>(-)</sub>mCherry&eGFP  
878 mini-replicon in *N. benthamiana* leaves. (A) Foci of eGFP and mCherry fluorescence  
879 expressed from SR<sub>(-)</sub>mCherry&eGFP in *N. benthamiana* leaves co-expressing N, RdRp and  
880 the VSRs at 3, 6, 9 and 12 dpi, respectively. Fluorescence of eGFP and mCherry were  
881 photographed under a fluorescence microscope using GFP and RFP filters,

882 respectively. Bars represent 400  $\mu$ m. (B) Western immunoblot detection of the N,  
883 eGFP and mCherry proteins in leaves shown in panel A, using specific antibodies  
884 against N, GFP and mCherry, respectively. The empty vector (Vec) was used as a  
885 negative control. Ponceau S staining was used as protein loading control.

886

887 **Fig. S3** The role of 5'-UTR, 3'-UTR and IGR on viral RNA synthesis from the  
888 SR<sub>(-)</sub>mCherry&eGFP mini-replicon. (A) Schematic representation of TSWV  
889 SR<sub>(-)</sub>mCherry&eGFP and derivatives with deletions of the 5'UTR, IGR or 3'UTR. (B) eGFP  
890 and mCherry fluorescence expressed from TSWV SR<sub>(-)</sub>mCherry&eGFP and mutant  
891 derivatives in *N. benthamiana*. The SR<sub>(-)</sub>mCherry&eGFP or its mutants were coexpressed  
892 with N, RdRp and the four VSRs in *N. benthamiana* leaves. The agroinfiltrated leaves  
893 were examined and photographed at 5 dpi under a fluorescence microscope using  
894 GFP and RFP filters, respectively. Bars represent 200  $\mu$ m. (C) Western immunoblot  
895 detection of the N and eGFP proteins expressed from the SR<sub>(-)</sub>mCherry&eGFP  
896 mini-replicon and mutant derivatives, using specific antibodies against N and GFP,  
897 respectively. Ponceau S staining was used as protein loading control. (D) Northern  
898 blot analysis of viral RNA synthesis from SR<sub>(-)</sub>mCherry&eGFP and mutant derivatives. The  
899 anti-genomic RNAs (red arrow), genomic RNAs (blue arrow) and eGFP mRNA  
900 transcripts (green arrow) were detected with DIG-labeled sense eGFP or anti-sense  
901 eGFP probes. Ethidium bromide staining was used as RNA loading control.

902

903 **Fig. S4** Cell-to-cell movement analysis of SR<sub>(-)</sub>GFP and MR<sub>(-)</sub>mCherry in *N. benthamiana*

904 co-expressing RdRp, N and four VSRs in *N. benthamiana*. Agroinfiltrated leaves were  
905 examined and photographed at 5 dpi under a fluorescence microscope. Bars represent  
906 400  $\mu\text{m}$ .

907

908 **Fig. S5** Functional analysis of RdRp expressed from TSWV  $L_{(+)\text{opt}}$ , NSm from  
909  $MR_{(-)\text{eGFP}}$  and N from  $SR_{(+)\text{eGFP}}$  using the mini-genome replication system in *N.*  
910 *benthamiana*. (A) Functional analysis of RdRp expressed from TSWV  $L_{(+)\text{opt}}$  using the  
911 S RNA mini-replicon system in *N. benthamiana*. The  $L_{(+)\text{opt}}$ , RdRp, or pCB301 empty  
912 vector (Vec) was co-expressed with N,  $SR_{(-)\text{mCherry\&eGFP}}$  and the four VSRs in *N.*  
913 *benthamiana* leaves. (B) Functional analysis of N expressed from  $SR_{(+)\text{eGFP}}$  in *N.*  
914 *benthamiana*.  $SR_{(+)\text{eGFP}}$  was co-expressed with the empty vector (Vec), N, RdRp or  
915  $N+L_{(+)\text{opt}}$  in *N. benthamiana* leaves in the presence of four VSRs. (C) Functional  
916 analysis of NSm expressed from  $MR_{(-)\text{eGFP}}$  in *N. benthamiana*.  $MR_{(-)\text{eGFP}}$  was  
917 co-expressed with the empty vector (Vec), N, RdRp or  $N+L_{(+)\text{opt}}$  in *N. benthamiana*  
918 leaves in the presence of four VSRs. Foci showing mCherry and eGFP fluorescence in  
919 agroinfiltrated *N. benthamiana* leaves were examined at 3 dpi by a fluorescence  
920 microscope. Bars represent 400  $\mu\text{m}$ .

921

922 **Fig. S6** Analysis of *N. benthamiana* leaves agroinfiltrated with constructs of  $SR_{(+)\text{eGFP}}$ ,  
923  $MR_{(-)\text{mCherry}}$  and  $L_{(+)\text{opt}}$ , or  $SR_{(+)\text{eGFP}}$ ,  $MR_{(-)\text{opt}}$  and  $L_{(+)\text{opt}}$  or  $S_{(+)}$ ,  $MR_{(-)\text{eGFP}}$  and  $L_{(+)\text{opt}}$ . (A)  
924 Local infection analysis of cell-to-cell movement of  $SR_{(+)\text{eGFP}}$  and  $MR_{(-)\text{mCherry}}$   
925 co-expressing with  $L_{(+)\text{opt}}$  and four VSRs in *N. benthamiana* by agroinfiltration. The

926 agro-infiltrated leaves were examined and photographed at 5 dpi under a fluorescence  
927 microscope. Bars represent 400  $\mu$ m. (B) RT-PCR analysis on systemically infected  
928 leaves from *N. benthamiana* plants agroinfiltrated with SR<sub>(+)eGFP</sub>, MR<sub>(-)mCherry</sub> and  
929 L<sub>(+)opt</sub>. (C) RT-PCR analysis on systemically infected leaves from *N. benthamiana*  
930 plants agroinfiltrated with S<sub>(+)</sub>, MR<sub>(-)eGFP</sub> and L<sub>(+)opt</sub> (D) RT-PCR analysis on  
931 systemically infected leaves from *N. benthamiana* plants agroinfiltrated with SR<sub>(+)eGFP</sub>,  
932 M<sub>(-)opt</sub> and L<sub>(+)opt</sub>. All agroinfiltrations were performed in the additional presence four  
933 VSRs constructs. RT PCR was performed on total RNA purified from systemic leaves  
934 for detection of S, M or L segments using segment-specific primers. Amplicons were  
935 resolved by electrophoresis in a 1 % agarose gel. Lanes 1-2 represent two biological  
936 replicates of systemic infected leaf samples; As positive controls (CK<sup>+</sup>) for proper  
937 fragment size, PCR was performed on plasmids carrying S, M , L<sub>(+)opt</sub> or derivatives.  
938 As negative control (CK<sup>-</sup>), RT-PCR was performed in the absence of nucleic acids.  
939 DNA size markers are shown on the left hand side.

940

941 **Fig. S7** Northern blot detection of viral RNA synthesis produced from full length S<sub>(+)</sub>  
942 and wild type M<sub>(-)</sub> replicons. (A and B) The full length S<sub>(+)</sub> or wild type M<sub>(-)</sub> was  
943 co-expressed with the empty vector (Vec), N, RdRp<sub>opt</sub> or N+RdRp<sub>opt</sub> in *N.*  
944 *benthamiana* leaves in the presence of four VSRs. The genomic RNAs (blue arrow),  
945 anti-genomic RNAs (red arrow) of S (A) and M (B) were detected with DIG-labeled  
946 sense or anti-sense NSs and NSm probes, respectively. Ethidium bromide staining  
947 was used as RNA loading control.



948

949 **Fig. S8** RT-PCR detection of S(+), M(-)<sub>opt</sub> and L(+)<sub>opt</sub> genomic RNA in systemic leaves  
950 of *N. benthamiana* infected by rTSWV. The S(+), M(-)<sub>opt</sub> and L(+)<sub>opt</sub> and the four VSRs  
951 were co-expressed in *N. benthamiana* leaves by agroinfiltration. Total RNA was  
952 purified from systemic leaves of agroinfiltrated plants and the presence of S(+), M(-)<sub>opt</sub>  
953 and L(+)<sub>opt</sub> were detected by RT-PCR using segment-specific primers. RT-PCR  
954 products were resolved by electrophoresis in a 1% agarose gel. Lanes 1-2, two  
955 biological replicates of systemic infected leaf samples; RT-PCR on plasmids carrying  
956 S, M and L as DNA template were used as positive controls (CK<sup>+</sup>). RT-PCR without  
957 adding the DNA template was used as negative controls (CK<sup>-</sup>). DNA size markers are  
958 shown on the left hand side.

959

960 **Fig. S9** Optimized RdRp gene sequence used in the study.

961

962 **Fig. S10** Optimized GP gene sequence used in the study.

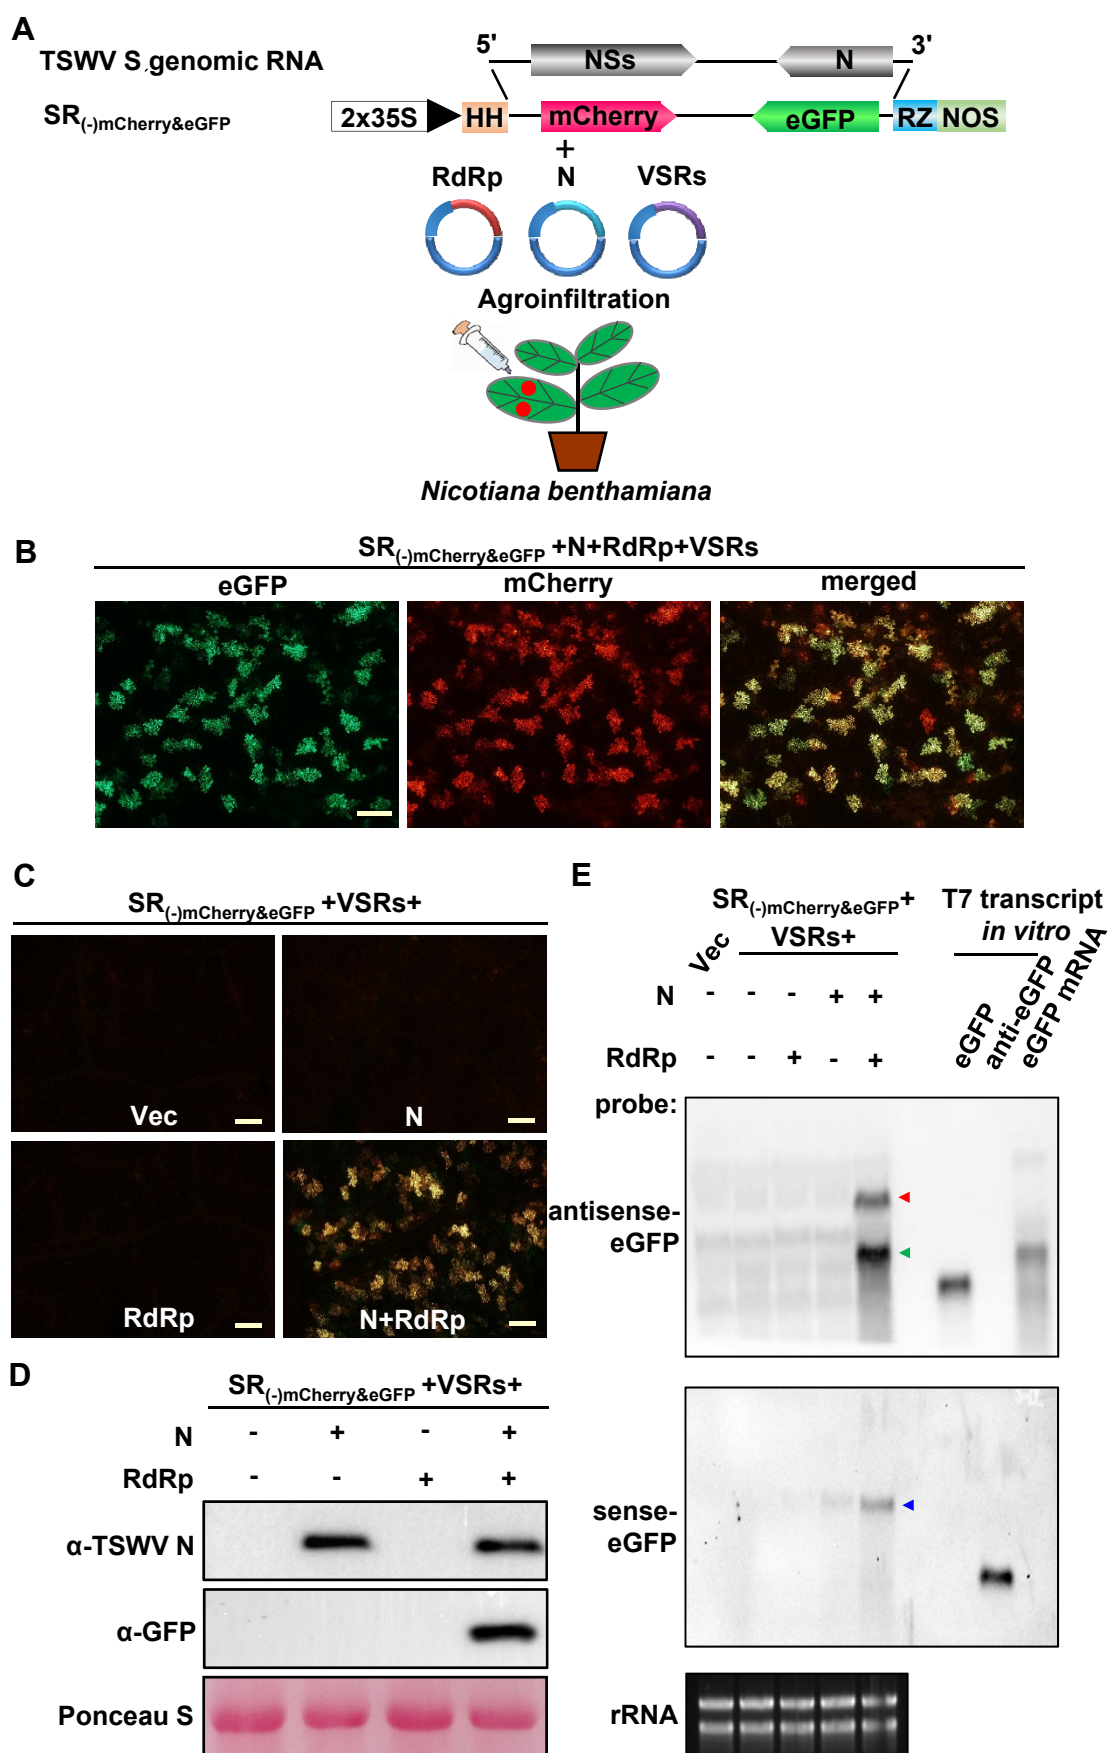

Fig. 1

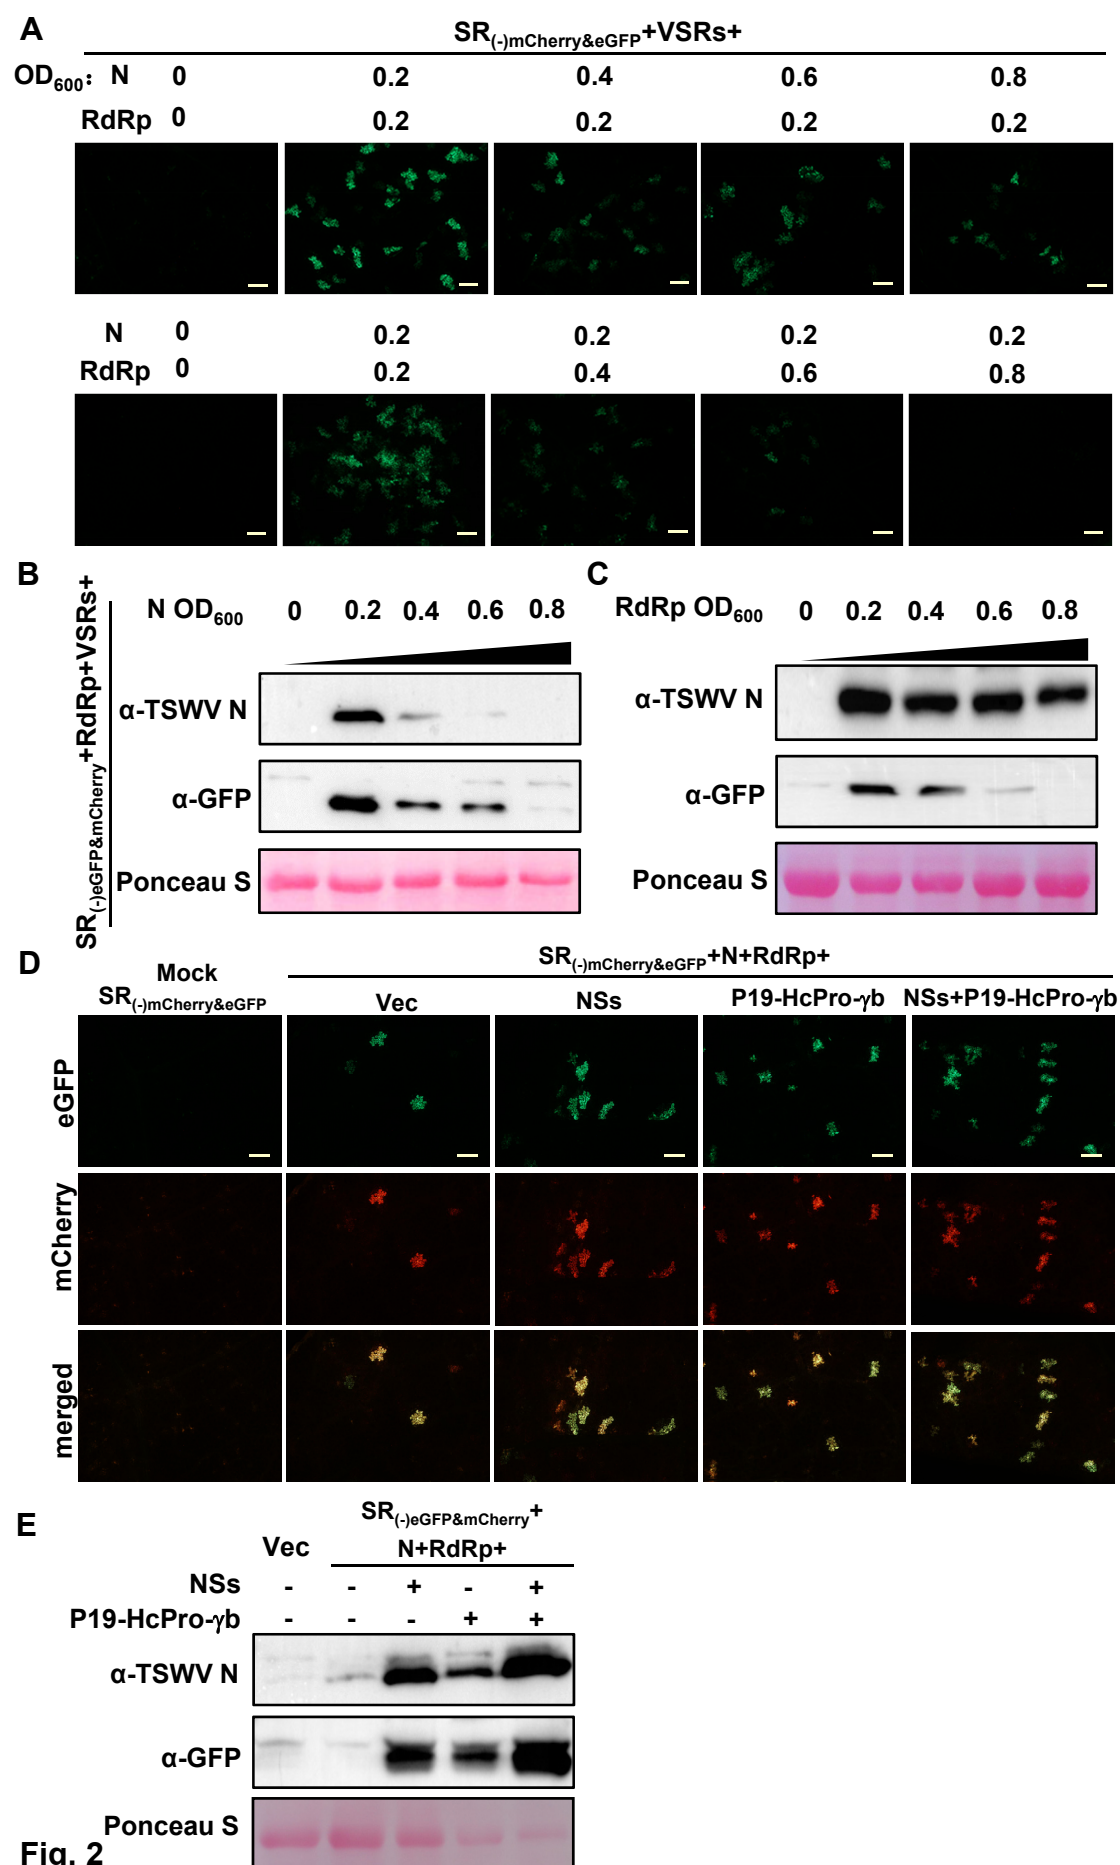

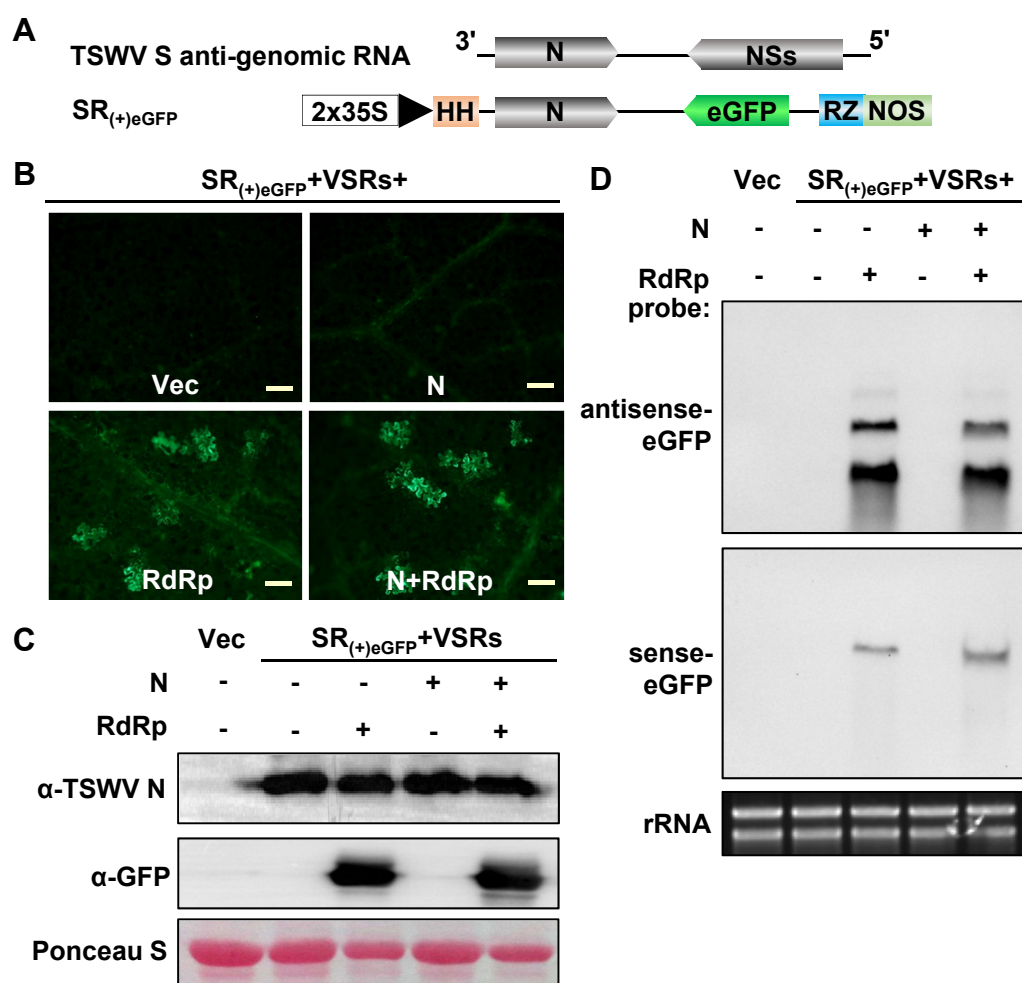

Fig. 3

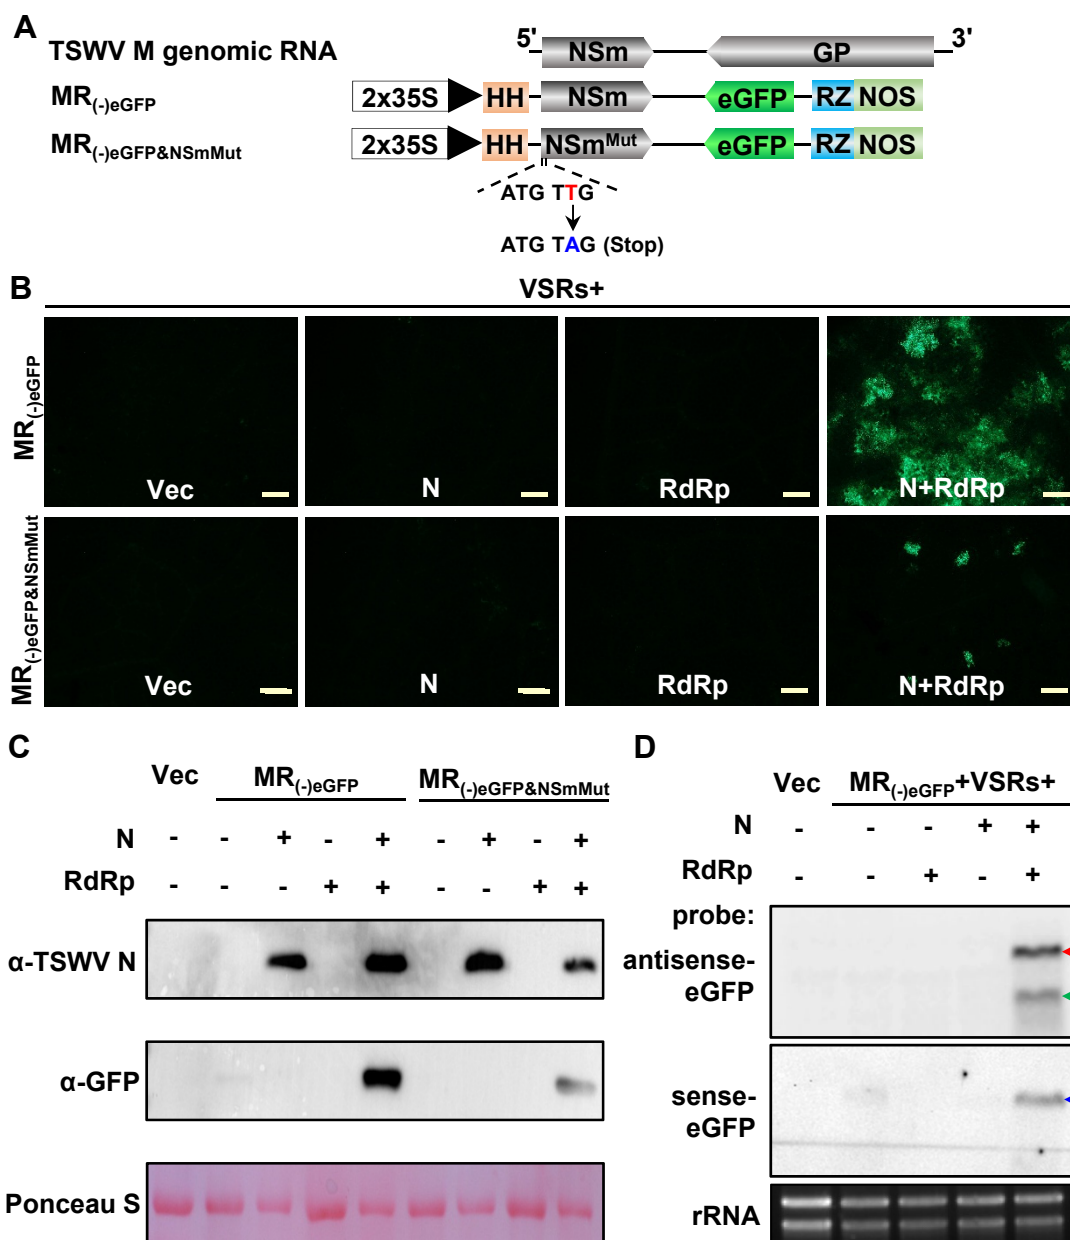

Fig. 4



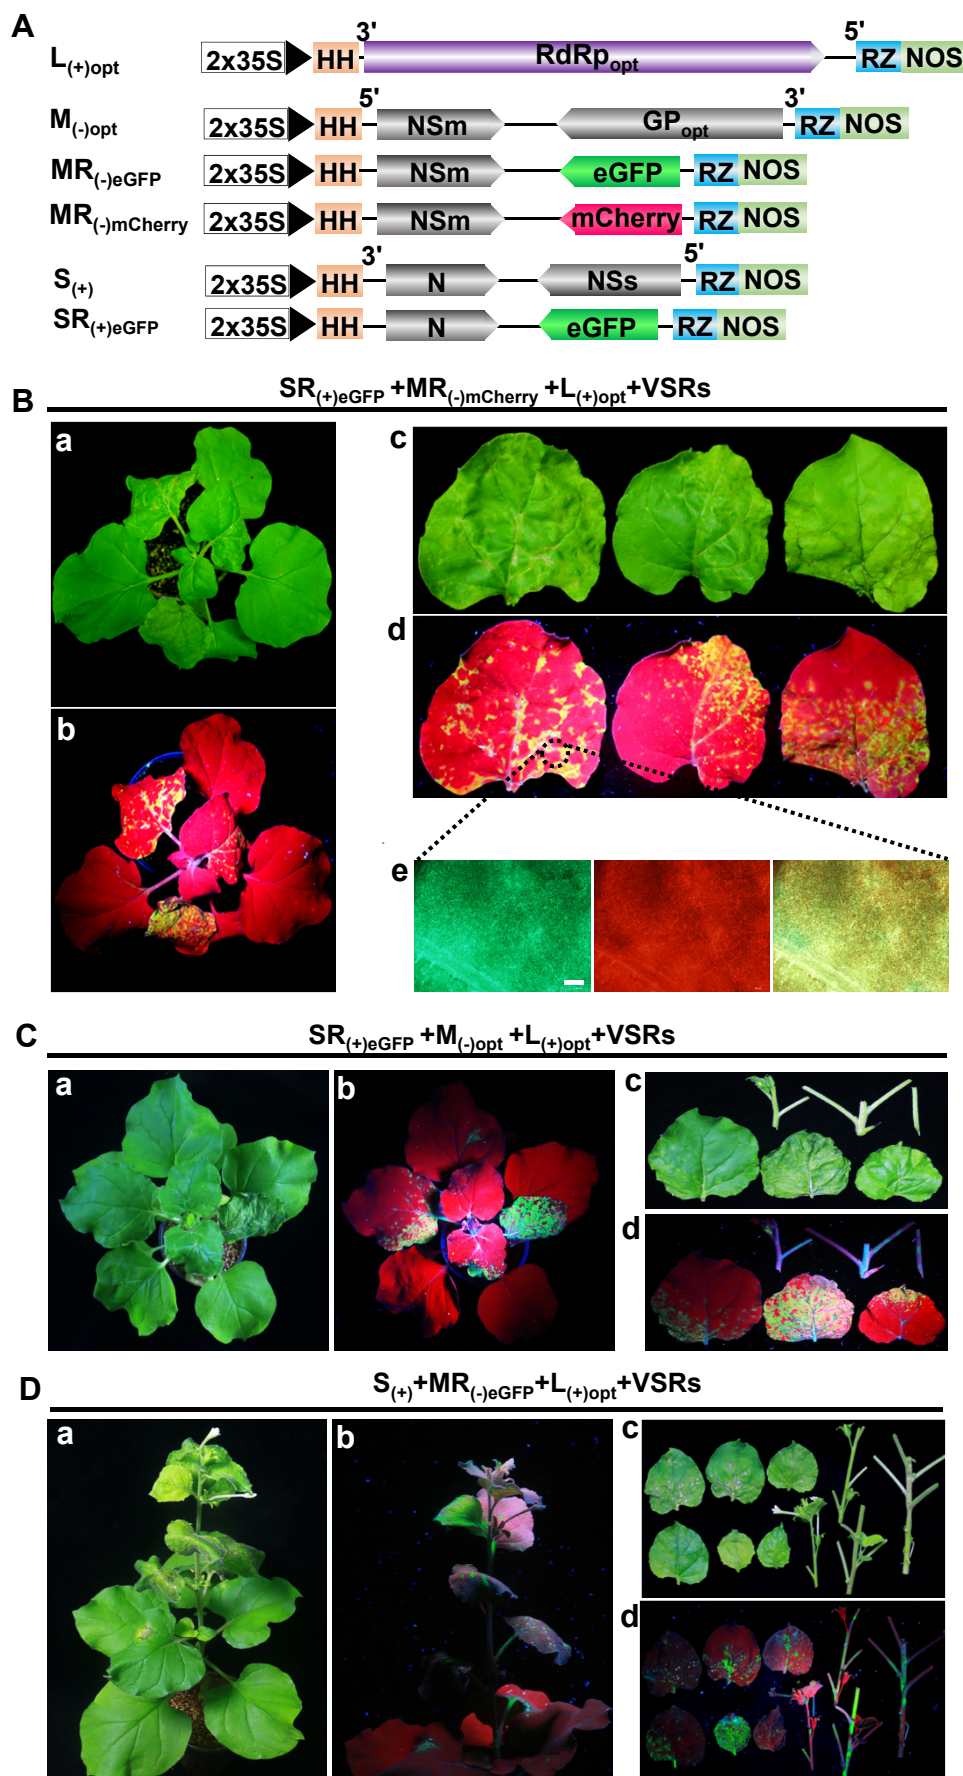

**Fig. 5**

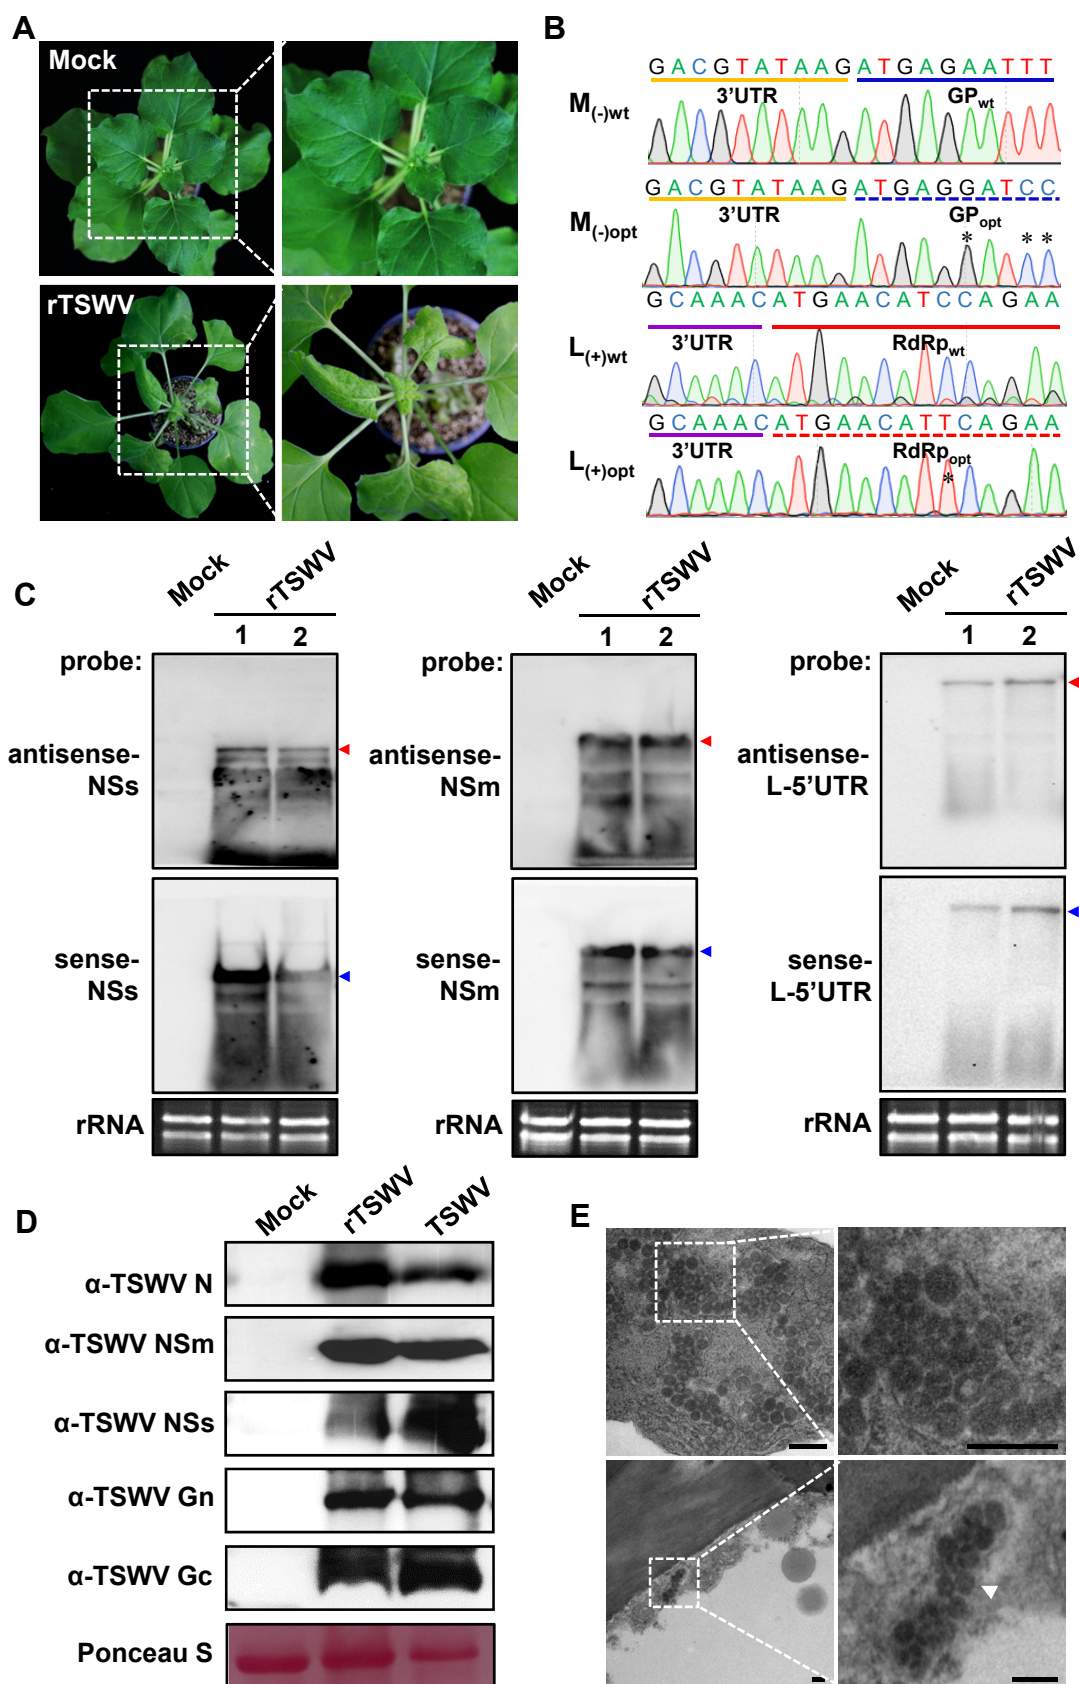

Fig. 6

## 1 **Supplementary Materials and Methods**

### 2 **Plasmid construction**

3 **Construction of RdRp, RdRp<sub>opt</sub>, N, NSs and VSRs.** The cDNA of the RdRp, N, and NSs  
4 genes was amplified from the total RNA of TSWV-lettuce isolate infected tissues and  
5 inserted into a binary vector pCambia2300 or pCXS<sub>N</sub> to generate p2300-RdRp<sub>wt</sub>, p2300-  
6 N, and pCXS<sub>N</sub>-NSs downstream a double 35S promoter (2×35S). The P19-HcPro-γb  
7 carrying three VSRs simultaneously in the pCB301 vector was kindly provided by Dr.  
8 Xianbing Wang in College of Biological Sciences of China Agricultural University. The  
9 codon usage and intron-splicing sites optimized sequence of RdRp (*SI Appendix, Fig. S9*)  
10 was *de novo* synthesized by GenScript Biotech Corp (Nanjing, China) and was inserted  
11 into a binary vector pCambia2300 to generate p2300S-RdRp<sub>opt</sub> downstream a 2×35S  
12 promoter.

13 **Construction of full length TSWV genomic S<sub>(-)</sub>, M<sub>(-)</sub>, L<sub>(-)</sub>, and anti-genomic S<sub>(+)</sub>, M<sub>(+)</sub> and**  
14 **L<sub>(+)</sub> cDNA clones.** To generate constructs to express full length TSWV genomic RNA and  
15 antigenomic RNA S, M and L segments, total RNA extracted from TSWV-lettuce infected  
16 leaves of *N. benthamiana* plants was reverse transcribed into cDNA, followed by PCR  
17 amplification with specific primers (*SI Appendix, Table S3*) using Phanta Super-Fidelity  
18 DNA Polymerase (Vazyme Biotech, Nanjing, China). The PCR products were fused with  
19 a self-cleaving hammerhead (HH) ribozyme (1) and inserted into a binary expression  
20 vector pCB301-2×35S-RZ-NOS linearized by two restriction endonucleases *Stu* I and *Sma*  
21 I (2). The pCB301-2×35S-HH-S<sub>(-)</sub>-RZ-NOS [S<sub>(-)</sub>], pCB301-2×35S-HH-M<sub>(-)</sub>-RZ-NOS  
22 [M<sub>(-)</sub>], pCB301-2×35S-HH-L<sub>(-)</sub>-RZ-NOS [L<sub>(-)</sub>], pCB301- pCB301-2×35S-HH-S<sub>(+)</sub>-RZ-  
23 NOS [S<sub>(+)</sub>], 2×35S-HH-M<sub>(+)</sub>-RZ-NOS [M<sub>(+)</sub>] and pCB301-2×35S-HH-L<sub>(+)</sub>-RZ-NOS [L<sub>(+)</sub>]



24 cDNA clones were generated. The full length TSWV genomic S<sub>(-)</sub>, M<sub>(-)</sub> and L<sub>(-)</sub>, and anti-  
25 genomic S<sub>(+)</sub>, M<sub>(+)</sub> and L<sub>(+)</sub> were expressed downstream a double 35S promoter (2×35S)  
26 and franked with a self-cleaving hammerhead (HH) ribozyme at 5'-terminus and a Hepatitis  
27 delta virus (HDV) ribozyme at 3'-terminus.

28 **Construction of TSWV SR<sub>(-)eGFP</sub>, SR<sub>(-)mCherry&eGFP</sub> and SR<sub>(+)eGFP</sub> minireplicons.** To  
29 generate SR<sub>(-)eGFP</sub>-genomic RNA minireplicon, the eGFP ORF was amplified and used to  
30 replace the N gene in the pCB301-2×35S-HH-S<sub>(-)</sub>-RZ-NOS by the *in vitro* recombination  
31 using the In-Fusion Cloning mixture (Clontech, Japan). The construct pCB301-2×35S-HH-  
32 SR<sub>(-)eGFP</sub>-RZ-NOS [SR<sub>(-)eGFP</sub>] was generated.

33 To generate SR<sub>(-)mCherry&eGFP</sub> in which the NSs and N genes in S gRNA were replaced  
34 with mCherry and eGFP, respectively, the mCherry ORF was amplified and used to  
35 exchange the NSs gene in the pCB301-2×35S-HH-SR<sub>(-)eGFP</sub>-RZ-NOS by recombination  
36 using In-Fusion Cloning mixture (Clontech). The construct pCB301-2×35S-HH-  
37 SR<sub>(-)mCherry&eGFP</sub>-RZ-NOS [35S:SR<sub>(-)mCherry&eGFP</sub>] was generated. The T7:SR<sub>(-)mCherry&eGFP</sub>  
38 minireplicon (pCB301-T7-HH-SR<sub>(-)mCherry&eGFP</sub>-RZ-NOS) controlled by T7 promoter was  
39 constructed by the same strategy as 35S:SR<sub>(-)mCherry&eGFP</sub>.

40 To generate antigenomic S<sub>(+)eGFP</sub>-minireplicon, the eGFP ORF was amplified and used  
41 to replace the NSs gene in the pCB301-2×35S-HH-S<sub>(-)</sub>-RZ-NOS by recombination using  
42 In-Fusion Cloning mixture (Clontech). The construct pCB301-2×35S-HH-SR<sub>(+)eGFP</sub>-RZ-  
43 NOS [SR<sub>(+)eGFP</sub>] was generated. The primers used above are listed in [SI Appendix, Table](#)  
44 [S3](#).

45 **Construction of SR<sub>(-)mCherry&eGFPΔ5'UTR</sub>, SR<sub>(-)mCherry&eGFPΔIGR</sub> and SR<sub>(-)mCherry&eGFPΔ3'UTR</sub>**  
46 **mutants.** To generate SR<sub>(-)mCherry&eGFPΔ5'UTR</sub>, the DNA copy of SR<sub>(-)mCherry&eGFP</sub> without 5'-

47 UTR (88 nt) was amplified from pCB301-2×35S-HH-SR<sub>(-)</sub>mCherry&eGFP-RZ-NOS and used  
48 to recombine with backbone vector of pCB301-2×35S-HH-SR<sub>(-)</sub>mCherry&eGFP-RZ-NOS by  
49 recombination using In-Fusion Cloning mixture (Clontech). The construct pCB301-  
50 2×35S-HH-SR<sub>(-)</sub>mCherry&eGFPΔ5'UTR-RZ-NOS [SR<sub>(-)</sub>mCherry&eGFPΔ5'UTR] was generated.

51 To generate SR<sub>(-)</sub>mCherry&eGFPΔIGR, the DNA copy of SR<sub>(-)</sub>mCherry&eGFP without IGR (550  
52 nt) was amplified from pCB301-2×35S-HH-SR<sub>(-)</sub>mCherry&eGFP-RZ-NOS and used to  
53 recombine with the vector backbone from pCB301-2×35S-HH-SR<sub>(-)</sub>mCherry&eGFP-RZ-NOS  
54 by recombination using In-Fusion Cloning mixture (Clontech). The construct pCB301-  
55 2×35S-HH-SR<sub>(-)</sub>mCherry&eGFPΔIGR-RZ-NOS [SR<sub>(-)</sub>mCherry&eGFPΔIGR] was generated.

56 To generate SR<sub>(-)</sub>mCherry&eGFPΔ3'UTR, the DNA copy of SR<sub>(-)</sub>mCherry&eGFP without 3'-UTR  
57 (151 nt) was amplified from pCB301-2×35S-HH-SR<sub>(-)</sub>mCherry&eGFP-RZ-NOS and used to  
58 recombine with the vector backbone from pCB301-2×35S-HH-SR<sub>(-)</sub>mCherry&eGFP-RZ-NOS  
59 using the primer pair FMF48/P3382 by recombination using In-Fusion Cloning mixture  
60 (Clontech). The construct pCB301-2×35S-HH-SR<sub>(-)</sub>mCherry&eGFPΔ3'UTR-RZ-NOS  
61 [SR<sub>(-)</sub>mCherry&eGFPΔ3'UTR] was generated. The primers used above are listed in *SI Appendix*,  
62 [Table S3](#).

63 **Construction of TSWV MR<sub>(-)eGFP</sub>, MR<sub>(-)mCherry</sub> and MR<sub>(-)eGFPNSmMut</sub> minireplicons.** To  
64 generate MR<sub>(-)eGFP</sub> and MR<sub>(-)mCherry</sub> minireplicons, the eGFP and mCherry ORFs were  
65 amplified and used to replace the GP gene in pCB3012×35S-HH-M<sub>(-)</sub>RZ-NOS,  
66 respectively, by recombination using In-Fusion Cloning mixture (Clontech). The  
67 constructs pCB301-2×35S-HH-MR<sub>(-)eGFP</sub>-RZ-NOS [MR<sub>(-)eGFP</sub>] and pCB301-2×35S-HH-  
68 MR<sub>(-)mCherry</sub>-RZ-NOS [MR<sub>(-)mCherry</sub>] was generated.

69 To generate MR<sub>(-)eGFPNSmMut</sub> in which a stop codon was introduced immediately after

70 the start codon of NSm, the NSm<sup>Mut</sup> was amplified and used to replace the wild type NSm  
71 sequence in pCB301-2×35S-HH-MR<sub>(-)eGFP</sub>-RZ-NOS by recombination using In-Fusion  
72 Cloning mixture (Clontech). The construct pCB301-2×35S-HH-MR<sub>(-)eGFPNSmMut</sub>-RZ-NOS  
73 [MR<sub>(-)eGFPNSmMut</sub>] was generated. All primers used above are listed in *SI Appendix, Table*  
74 *S3*.

75 **Construction of full length L<sub>(+)opt</sub> and M<sub>(-)opt</sub> cDNA clones.** To generate full length L<sub>(+)opt</sub>  
76 cDNA clone, the sequence codon and intron-splicing sites optimized RdRp was amplified  
77 and used to replace the wild type RdRp sequence in pCB301-2×35S-HH-L<sub>(+)</sub>-RZ-NOS by  
78 recombination using the In-Fusion Cloning mixture (Clontech). The pCB301-2×35S-HH-  
79 L<sub>(-)opt</sub>-RZ-NOS [L<sub>(-)opt</sub>] was generated.

80 To generate full length M<sub>(-)opt</sub> cDNA clone, the codon and intron-splicing sites  
81 optimized GP gene was de novo synthesized by GenScript Biotech Corp (Nanjing, China)  
82 (*SI Appendix, Fig. S10*) and used to replace the wild type GP sequence in pCB301-2×35S-  
83 HH-M<sub>(-)</sub>-RZ-NOS by the *in vitro* recombination using In-Fusion Cloning mixture  
84 (Clontech). The pCB301-2×35S-HH-M<sub>(-)opt</sub>-RZ-NOS [M<sub>(-)opt</sub>] was generated. The primers  
85 used above are listed in *SI Appendix, Table S3*.

## 86 **Plant material and virus source**

87 Six to eight weeks of *Nicotiana benthamiana* was used in all agroinfiltration assay. *N.*  
88 *benthamiana* plants were grown in a growth chamber setting at 25 °C, a 16 h light and 8 h  
89 dark photoperiod (3). The TSWV isolate from asparagus lettuce (TSWV-LE) was used in  
90 this study (GenBank accession number: KU976396 for S, JN664253 for M and KU976394  
91 for L) (4). The TSWV-LE isolate was maintained on *N. benthamiana*. For long-term  
92 storage, the infected new leaves of *N. benthamiana* were kept in an 80 °C refrigerator.

## 93 **Agrobacterium infiltration**

94 Recombinant plasmids were electroporated into *Agrobacterium tumefaciens* strain  
95 GV3101 and agroinfiltrations were performed essentially as described (5, 6). *A.*  
96 *tumefaciens* cells were resuspended by agroinfiltration buffer [10 mM MgCl<sub>2</sub>, 10 mM  
97 MES (pH 5.6) and 100 μM acetosyringone] adjusted to an optical density OD<sub>600</sub> of 1.0 and  
98 incubated for 2 to 3 h in dark at room temperature. Equal volumes of *Agrobacterium*  
99 cultures (final concentration OD<sub>600</sub>=0.2) harboring the p2300-N, p2300-RdRp, pCB301-  
100 derived reporter or full-length infectious clone vector(s), were mixed with one volume of  
101 bacterial mixture (final concentration OD<sub>600</sub>=0.05) containing the NSs and P19-HcPro-γb.  
102 The *Agrobacterium* cultures were infiltrated into fully expanded leaves of 6-7 leaf stage *N.*  
103 *benthamiana* plants using 1 mL needleless syringes.

#### 104 **Immunoblot analysis**

105 Total protein was extracted from 1 g *Agrobacterium*-infiltrated leaf patches, healthy or  
106 TSWV-infected *N. benthamiana* systemic leaves in a 1 mL extraction buffer [10 % (v/v)  
107 glycerol, 25 mM Tris-HCl, pH 7.5, 1 mM EDTA, 150 mM NaCl, 10 mM dithiothreitol, 2 %  
108 (w/v) polyvinylpyrrolidone, 0.5 % (v/v) Triton X-100 and 1× protease inhibitors  
109 cocktail] (7). Protein samples were separated by SDS-PAGE gels, transferred to PVDF  
110 membranes (GE Healthcare, UK), blocked with 5 % skim milk solution and incubated with  
111 a polyclonal antiserum specific to the TSWV N, NSm, NSs, Gn, Gc, GFP, mCherry or T7  
112 RNA pol at room temperature for 1 h or overnight at 4 °C and washed three times. After  
113 incubation in a secondary antibody containing HRP-conjugated goat anti-rabbit (1:10000)  
114 for 1 h, the blots were detected using the ECL Substrate Kit (Thermo Scientific, Hudson,  
115 NH, USA). To evaluate protein loading, the blots were stained with Ponceau S.

#### 116 **Northern blot analysis**

117 For Northern blot analysis of TSWV gRNAs, agrRNAs or viral mRNA transcripts, total

118 RNAs were extracted from *Agrobacterium*-infiltrated leaf patches, healthy or TSWV-  
119 infected systemic leaves using an RNAprep Pure Plant Kit (Tiangen Biotech, Beijing,  
120 China), respectively. DIG-labeled specific probes for sense or antisense GFP, NSs, NSm,  
121 L-5'UTR was synthesized by DIG High Prime RNA labeling kit (Roche, Basel,  
122 Switzerland). The total RNAs were separated on 1 % formaldehyde agarose gels and  
123 transferred to Hybond-N+ membranes (GE Healthcare, UK) (8). The membrane blots were  
124 hybridized with a DIG-labeled specific probe and detected using a DIG-High Prime  
125 Detection Starter Kit II (Roche), following the manufacturer's protocol.

#### 126 **RT-PCR and sequencing analysis**

127 To detect the virus in systemic leaves of *N. benthamiana* infected with  
128 SR<sub>(+)</sub>eGFP+MR<sub>(-)</sub>mCherry+L<sub>(+)</sub>opt, S<sub>(+)</sub>+MR<sub>(-)</sub>eGFP+L<sub>(+)</sub>opt, SR<sub>(+)</sub>eGFP+M<sub>(-)</sub>opt+L<sub>(+)</sub>opt or rTSWV  
129 recovered from the full-length cDNA clones, total RNAs were extracted from systemic  
130 symptoms plant leaves. First-strand cDNAs were synthesized using M-MLV Reverse  
131 Transcriptase (Promega, USA). RT-PCRs were performed to detect the SR<sub>(+)</sub>eGFP,  
132 MR<sub>(-)</sub>mCherry, MR<sub>(-)</sub>eGFP, S<sub>(+)</sub>, M<sub>(-)</sub>opt and L<sub>(+)</sub>opt minigenome and genomic RNA using their  
133 specific-primers. The PCR products were inserted into a pMD19-T vector (Takara, Dalian,  
134 China) and sequenced by Sanger dideoxy-mediated chain-termination DNA sequencing  
135 method at Sangon Biotech (Shanghai, China). The primers used in this study are listed in  
136 [SI Appendix, Table S3](#).

#### 137 **Fluorescence microscopy**

138 The agro-infiltrated *N. benthamiana* leaves were examined for fluorescence expression  
139 using an OLYMPUS IX71-F22FL/DIC Inverted Fluorescence Microscope (OLYMPUS,  
140 Tokyo, Japan) with a green or red barrier filter. The leaf sample was fixed in water on a

141 microslider under a coverslip to detect the eGFP and mCherry fluorescence, respectively.  
142 Fluorescence images were processed using ImagePro (OLYMPUS, Tokyo, Japan) and  
143 Adobe (San Jose, CA, USA) Photoshop programs.

#### 144 **Electron microscopy**

145 Small tissues (1 mm × 4 mm) were excised from leaves of the *N. benthamiana* with infected  
146 rTSWV rescued from the full-length infectious clones. The sample tissues were fixed in  
147 2.5 % glutaraldehyde and 1 % osmium tetroxide dissolving into 100 mM phosphate buffer  
148 (pH 7.0) as described by Li *et al* (5, 9) and then embedded in Epon 812 resin as instructed  
149 by the manufacture (SPI-EM, Division of Structure Probe, Inc., West Chester, USA).  
150 Ultrathin sections (70 nm) were mounted on formvar-coate grids and then stained with  
151 uranyl acetate for 10 min followed by lead citrate for 10 min. The stained sections were  
152 examined under a transmission electron microscope (TEM; H-7650, Hitachi, Japan).

#### 153 **Imaging GFP in infected plant by hand-held UV lamp**

154 GFP fluorescence in leaves was monitored with a hand-held 100 W, long-wave UV lamp  
155 (UV Products, Upland, CA, USA) and the leaves were photographed using a Canon EOS  
156 70D digital camera (Canon, Japan) with a 58 mm UV filter.

157

#### 158 **References**

- 159 1. Herold J & Andino R (2000) Poliovirus requires a precise 5' end for efficient positive-strand RNA  
160 synthesis. *J Virol* 74(14):6394-6400.
- 161 2. Shen Y, *et al.* (2014) A versatile complementation assay for cell-to-cell and long distance  
162 movements by cucumber mosaic virus based agro-infiltration. *Virus Res* 190:25-33.
- 163 3. Voinnet O & Baulcombe DC (1997) Systemic signalling in gene silencing. *Nature* 389(6651):553.
- 164 4. Jiang L, *et al.* (2017) Occurrence and diversity of Tomato spotted wilt virus isolates breaking the  
165 Tsw resistance gene of Capsicum chinense in Yunnan, southwest China. *Plant Pathol* 66(6):980-  
166 989.
- 167 5. Wang Q, *et al.* (2015) Rescue of a plant negative-strand RNA virus from cloned cDNA: insights  
168 into enveloped plant virus movement and morphogenesis. *PLoS Pathog* 11(10):e1005223.
- 169 6. Ganesan U, *et al.* (2013) Construction of a Sonchus yellow net virus minireplicon: a step toward

- 170 reverse genetic analysis of plant negative-strand RNA viruses. *J Virol* 87(19):10598-10611.
- 171 7. Li J, *et al.* (2019) A plant immune receptor adopts a two-step recognition mechanism to enhance  
172 viral effector perception. *Mol Plant* 12(2):248-262.
- 173 8. Feng MF, *et al.* (2018) Identification of Strawberry vein banding virus encoded P6 as an RNA  
174 silencing suppressor. *Virology* 520:103-110.
- 175 9. Kong L, Wu J, Lu L, Xu Y, & Zhou X (2014) Interaction between Rice stripe virus disease-specific  
176 protein and host PsbP enhances virus symptoms. *Mol Plant* 7(4):691-708.
- 177
- 178
- 179

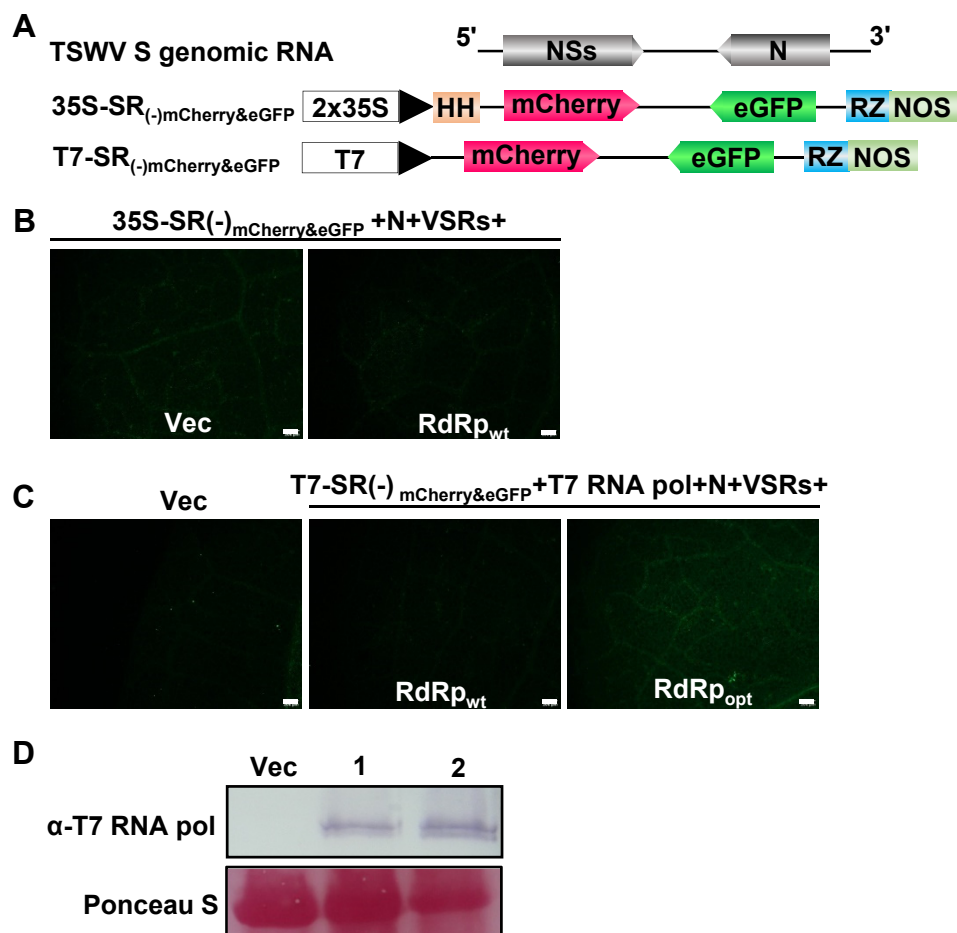

Fig. S1



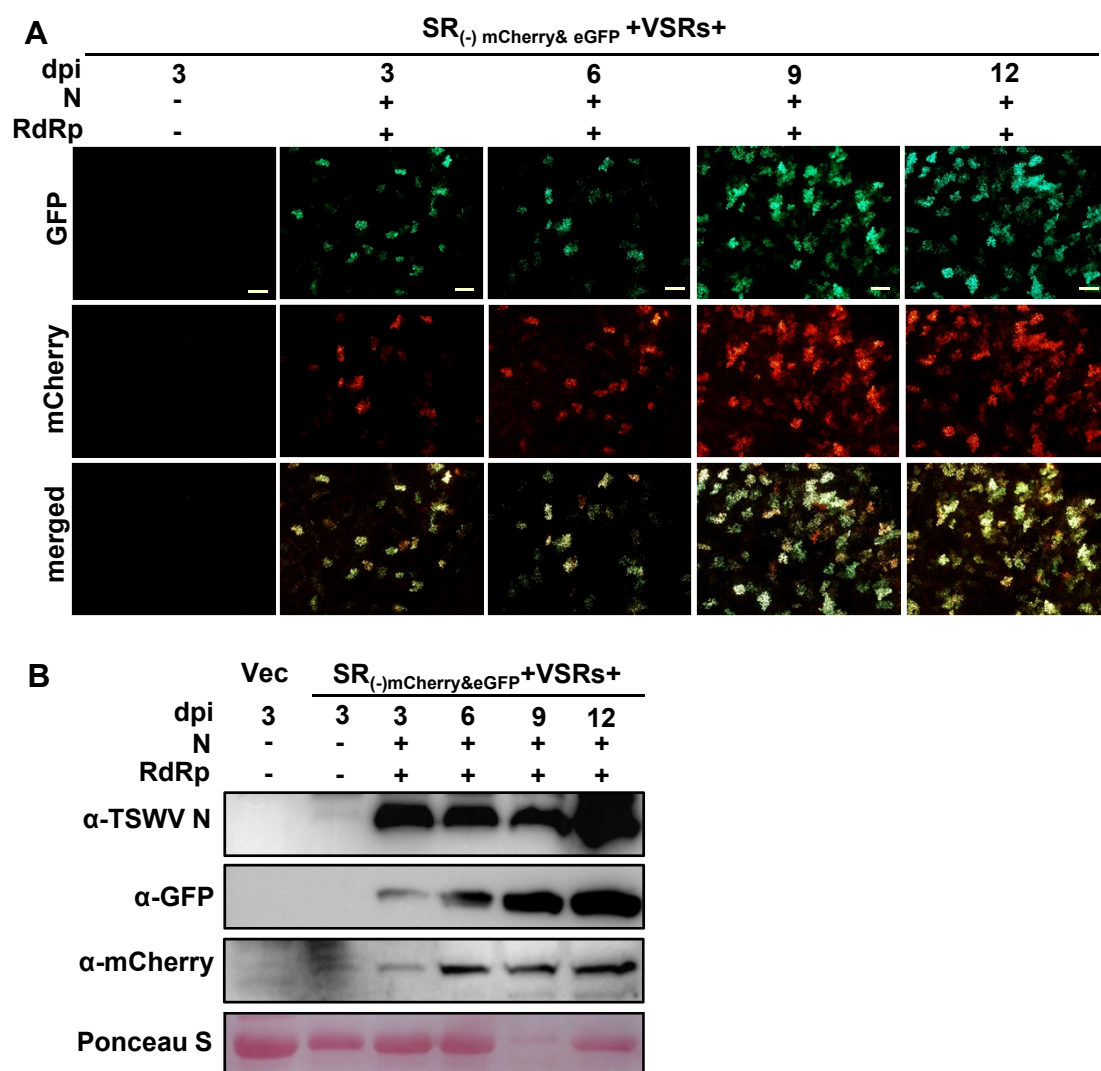

Fig. S2

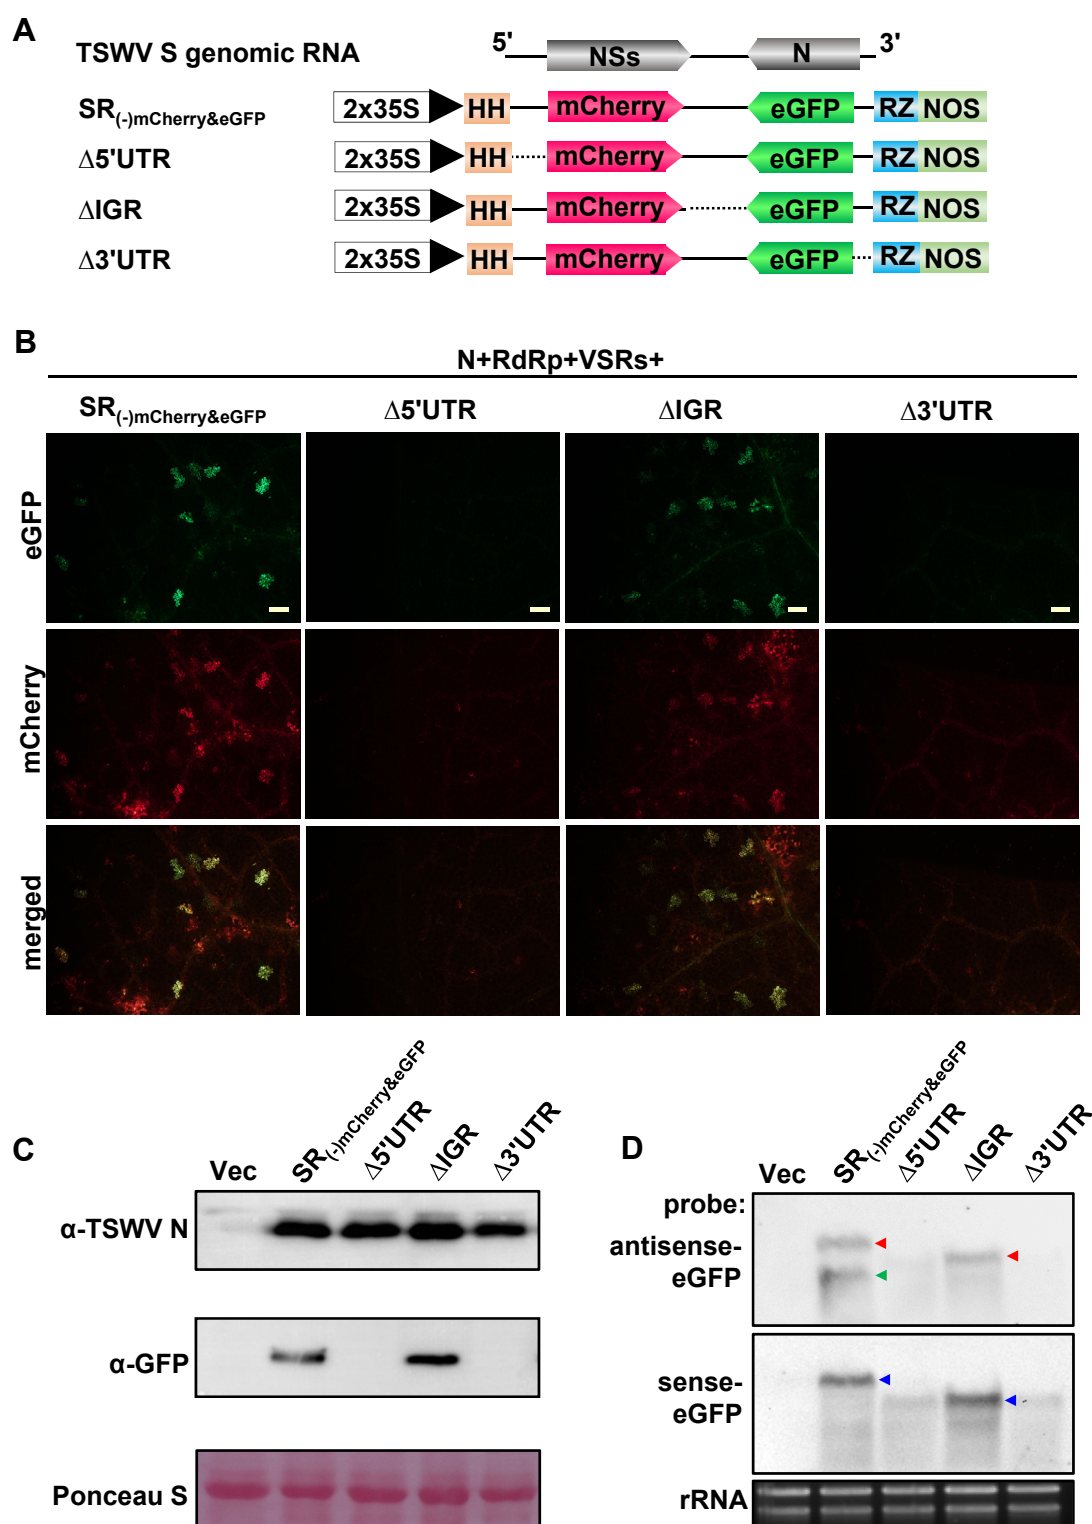

Fig. S3

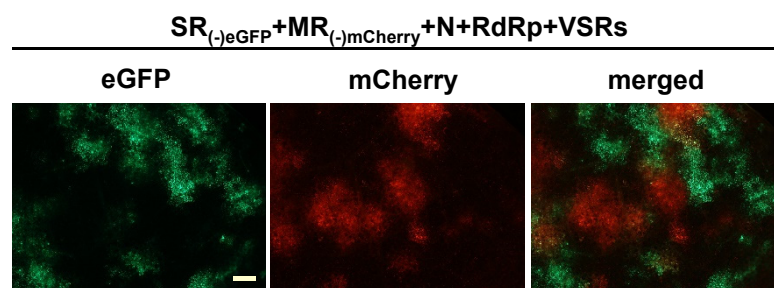

**Fig. S4**

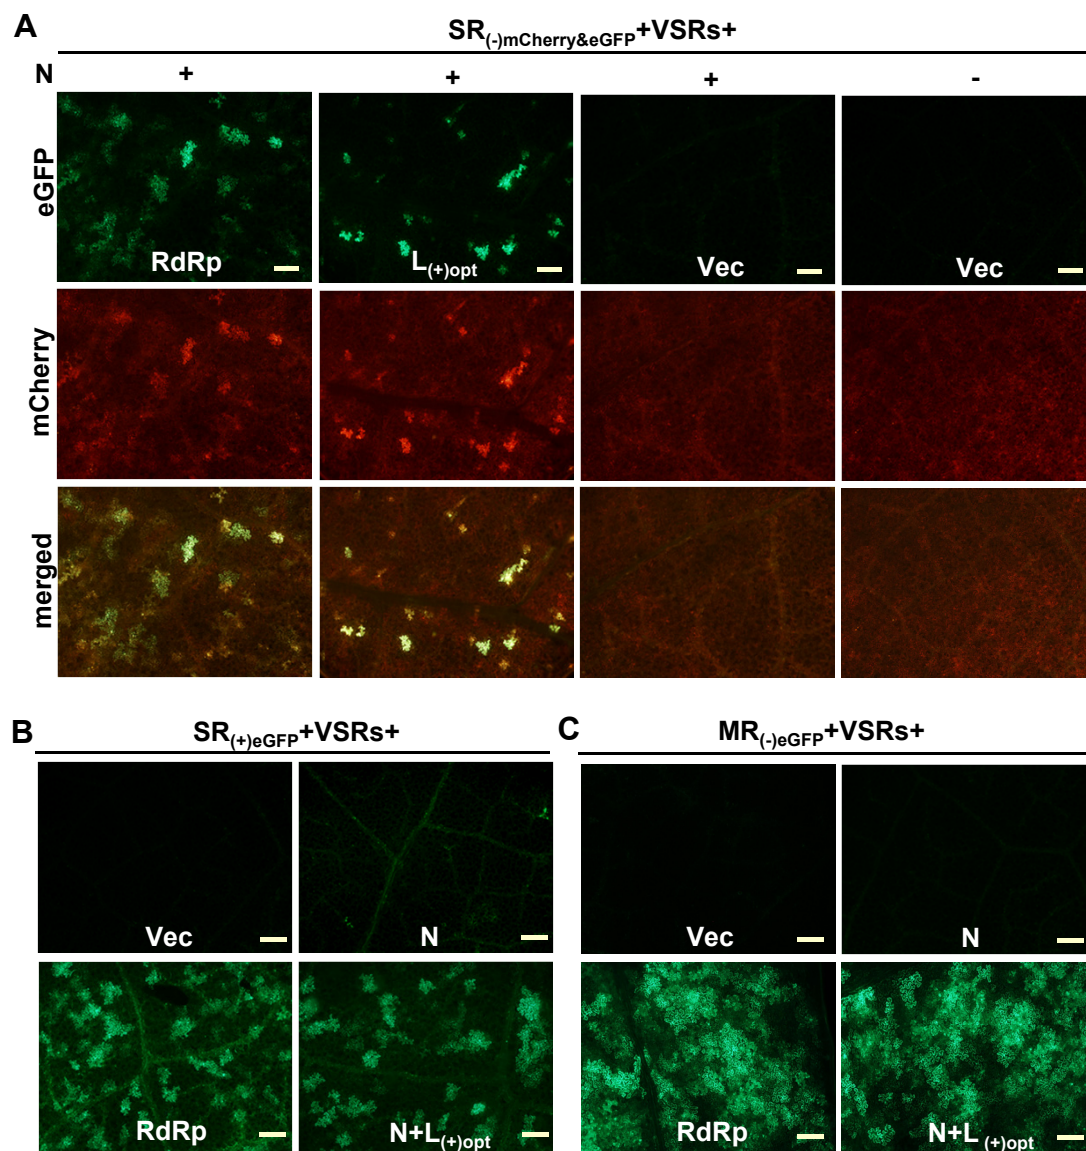

Fig. S5

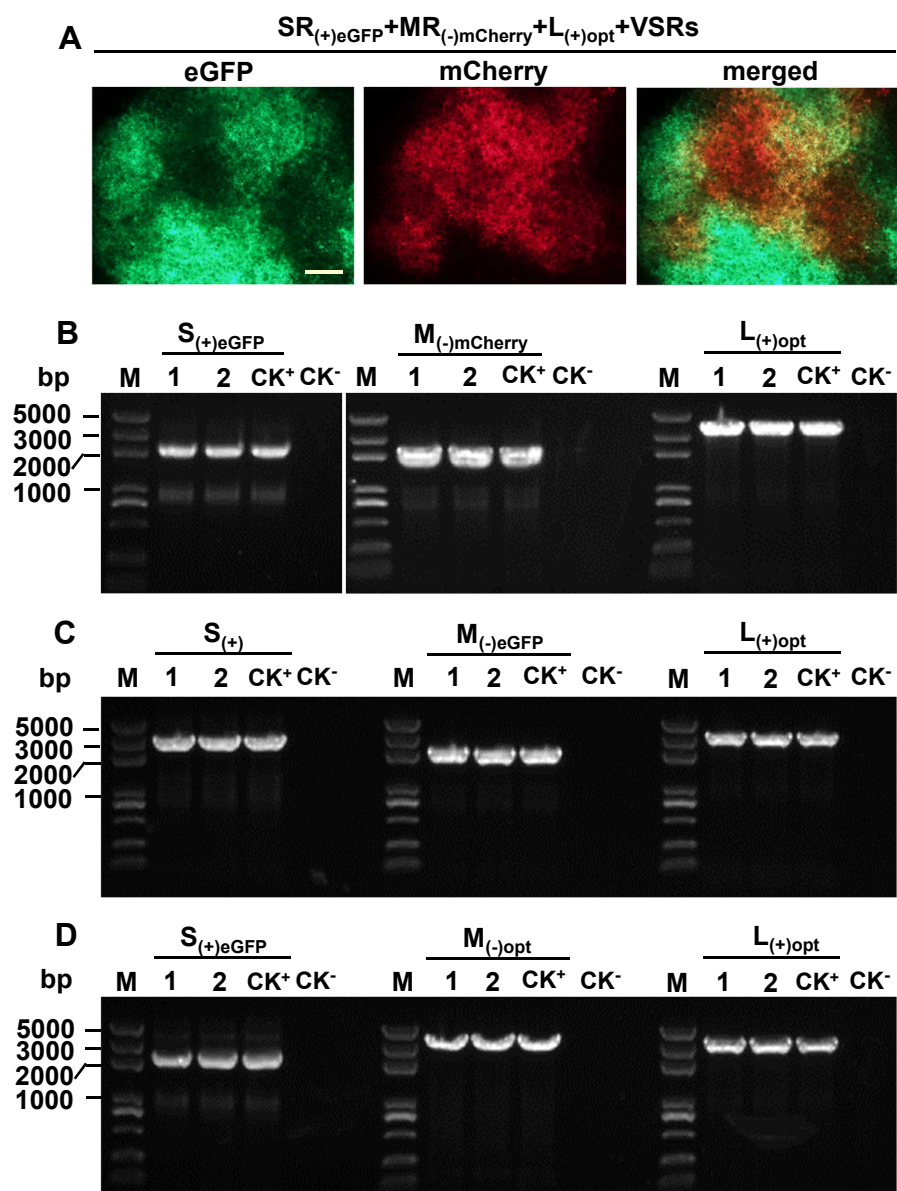

Fig. S6



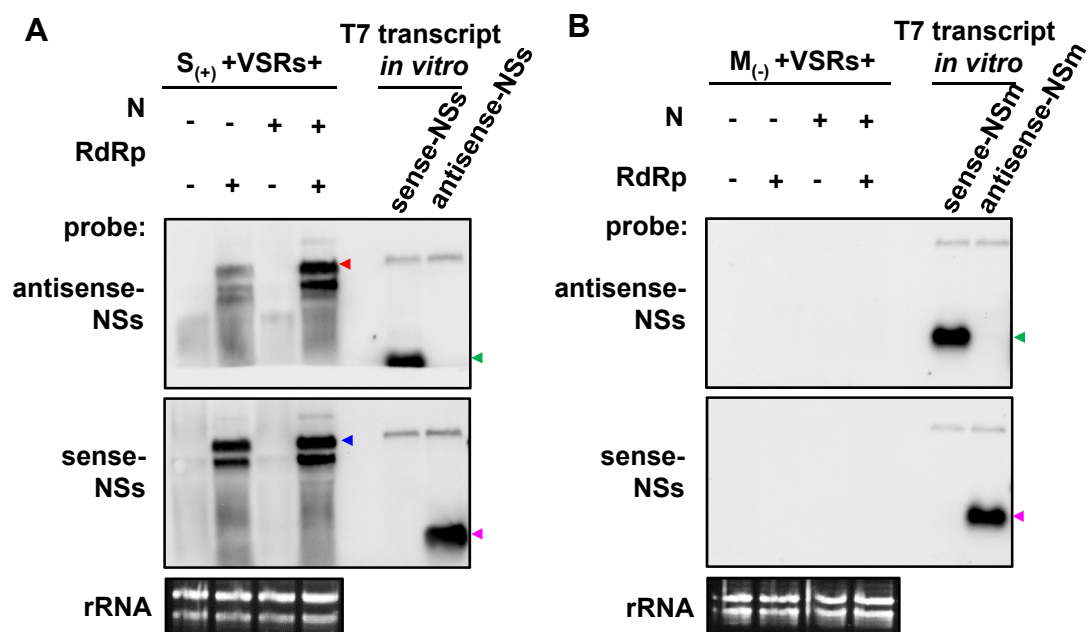

Fig. S7

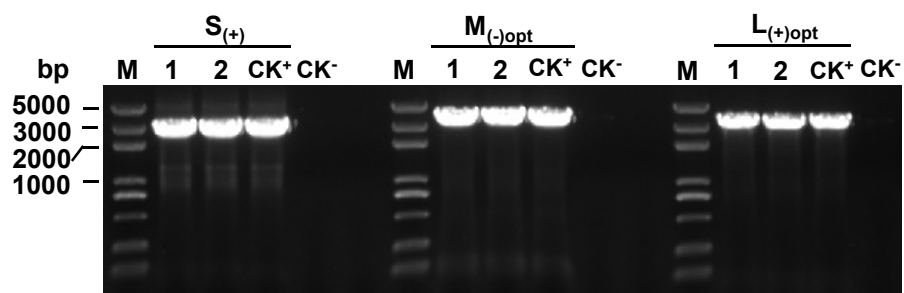

**Fig. S8**

**Fig. S9. Optimized RdRp gene sequence used in the study.**

ATGAACATTCAGAAGATCCAAAAGCTGATCGAGAACGGCACCACCTTGCTGCTTTCTATTGAGGATTGCGTGGGCAGCAA  
CTACGATCTTGCTCTTGATCTGCACAAGCGGAACTCCGATGAGATTCTTGAGGACGTGATCATCAACAACAACGCCAAGA  
ACTACGAGACTATGCGTGAGCTGATCGTGAAGATCACTGCTGATGGTGAGGGTCTGAACAAAGGTATGGCTACCGTGGAC  
GTGAAGAACTGTCTGAGATGGTGTCTCTGTTTCGAGCAGAAGTACCTTGAGACTGAGCTTGCTAGGCACGATATCTTCGG  
CGAGCTTATTTCTAGGCACCTGAGGATCAAGCCGAAGCAGAGATCTGAGGTTGAGATTGAGCACGCTCTGAGAGAGTAC  
CTGGACGAGCTTAAACAAGAAGTCTGCATCAACAAGCTGAGCGACGATGAGTTCGAGCGGATCAACAAAGAATATGTGG  
CCACCAACGCTACCCCGACAATTACGTTATCTACAAAGAGAGCAAGAACAGCGAGCTGTGCCTGATCATCTACGACTGG  
AAGATCTCTGTGGATGCCAGGACTGAGACTAAGACCATGGAAAAGTACTACAAGAACATCTGGAAGTCCTTCAAGGACAT  
CAAGGTGAACGGCAAAGCCTTTCTTGGAGGATCATCTGTGTTCTGTGAGCATCGTATCCTGAAGCCTATTGCTGGCATGC  
CTATTACCGTGACCTTAGCAGAGTGTCTCGAGAAGTTTGGAGACTCTCCTTCTGCACTTACCGCGAGAGGATTAAGCAC  
GCTAGGAACGCTAAGCTGCTGAACATTTCTCACGTGGGTCTCAGATCGTGGTACTACTCCTACTGTGGTGAGGAACTACTA  
CGCTAACACCCAGAAGATCAAGTCCGAGGTTAGGGGTATCTGGGTGATGATTTCCGGCAGCAAGGACGTGTTCTTCTCTC  
ACTGGACCTCCAAGTACAAAAGAGCGGAACCTACCGAGATCGCTTACTCTGAGGATATCGAGCGTATCATCGACAGCCTT  
GTGACCGACGAGATCACCAAAGAAGAGATTATCCACTTCTGTTTCGGCAACTTCTGCTTCCACATCGAGACAATGAACGA  
CCAGCACATTGCCGACAAGTTCAAGGGCTATCAGTCTTTCGATCAACCTGAAGATCGAGCCTAAGGTGGACCTGGCTG  
ATCTTAAGGATCACCTGATTGAGAAGCAGCAGATTTGGGAGAGCCTGTACGGTAAGCACCTCGAGAAGATTATGCTGCGG  
ATCCGTGAAAAAGAAGAAGAAAGAGAAAGAGATCCCGGACATCACCACCGCCTTCAATCAAAATGCTGCCGAGTACGAAG  
AGAAGTACCCGAAGTCTTACCAACGACCTGTCTAGAGACAAAGACCAACTTCTCTATGACCTGGTCACCGAGCTTCGA  
GAAAATCGAGCTGTCTAGCGAGGTGGACTACAACAATGCCATTATCAACAAGTTCCTGAGAGCTTCAAGTCCAGCAGCA  
GGGTGATCTACAACAGCCCTTACAGCTGCATTAACAACCAGACCAACAAGGCCCGGATATCACTAACCTTGTGAGGCTT  
TGCCTGACCGAGCTTTCTTGCATACCACCAAGATGGAAAAGCAAGAGCTTGAGGACGAGATCGACATCAACACCGGTA  
GCATTAAGGTGAGCGGACCAAGAAAAGCAAAGAGTGGAAACAAGCAGGGCTCTGCCTTACTAGGAACAAGAACGAGTT  
CTGCATGAAGGAAACCGCCGAGAGAACAAGACCATCTACTTCAAGGGTCTTGCCGTGATGAACATCGGCATGTCTCTA  
AGAAGCGGATTCTGAAAAAAGAGGAAATCAAAGAGAGGATCAGCAAGGGCCTCGAGTACGATACTTCTGAGAGACAGGC  
TGATCCGAACGACGACTACAGCAGCATCGATATGTCATCACTGACCCATATGAAGAAGCTCATCCGGCAGGATAACGAGG  
ACTCACTTTCTTGGTGGAGCGAATCAAGGACAGCTTGTTCGTGCTTCAACCGCGATATCAGAGAAGAGGGCAAGAT  
CACCAGCGTGTACAACAATTACGCTAAGAACCCGAGTGCCTGTACATCCAGGATTCTGTGCTTAAAGCCGAGCTGGAAA  
CCTGCAAGAAAATCAACAACTGTGCAACGATCTGGCCATCTACCACTACAGCGAGGACATGATGCAGTTCTCAAGGGT  
TTGATGGTGGCCGATCGGTACATGACCAAAAGAGTCTTTCAAGATCCTGACCACCGCCAATACCAGCATGATGTGCTTGC  
TTTCAAAGGCGACGGTATGAACACTGGTGGTTCTGGTGTCTCTTACATTTGCCCTGCACATCGTGGATGAGGATATGTCCG  
ATCAGTTCAACATCTGCTACACCAAAGAGATCTACAGCTACTTCCGGAACGGCTCCAACCTACATCTACATCATGAGGCCG  
AGAGGCTTAAACAGGTGAGGCTTCTTTCACTGTTCAAGACCCCTTCTAAGGTGCCAGTTTGTCTCGCCAGTTTCAAGCAA  
AAGGCCAACGAAATGAAAAATGGCTGAAGAACAAGGACATTGAGAAGGTCAACGTGTTTCAAGCATGACCATGACCGTGA  
AGCAGATCCTGATCAACATCGTGTCTCCAGCGTGTGATTTGGCACCGTGAAGTCTTCTCGGATGGGCATCTTCGAC  
TTCATGAGGTACGCTGGTTTCTTGGCCGTGTCCGACTACTCCAACATCAAAGAGTACATCCGGGACAAGTTCCGACCCGA  
TATTACCAATGTGGCCGATATCTACTTCGTGAACGGGATCAAGAACTGCTGTTCCGGATGGAAGATTTGAACCTGAGCA



CCAACGCAAAGCCTGTTGTGGTGGATCACGAGAACGATATCATCGGTGGCATCACCGACCTGAACATCAAGTGCCTATT  
ACTGGTTCTACCCTGCTGACCCTTGAGGACCTGTATAACAATGTGTACCTCGCCATCTACATGATGCCGAAGTCTCTGCAT  
AACCACGTGCACAACCTTACCAGCCTGCTTAATGTTCTGTGAGTGGGAGCTGAAGTTCGGGAAAGAGCTTGGCTTCA  
ACATTTTCGAGGACATCTACCCGAAGAAAGCCATGTTTCGATGACAAGGACCTCTTCAGCATTAAACGGCGCTCTTAACGTG  
AAGGCCCTGAGCGATTACTACCTGGGTAACATCGAGAATGTGGGCTGATGAGGTCCGAGATTGAGAACAAAGAGGACT  
TCCTGTCTCCGTGCTACAAGATCTTACCCTGAAGTCCAGTAAGAAGTGCAGCCAGAGCAACATCATCAGCACTGATGAG  
ATCATTGAGTGCCTGCAGAACGCAAAGATTGAGGACATCGAAAACCTGGAAGGGCAACAACCTGGCTATTATCAAGGGCT  
GATCCGGACCTACAACGAGGAAAAAATCGGCTGGTTGAGTTCCTTCGAGGATAACTGCGTGAACAGCCTGTACTGGTC  
GAGAAGCTTAAAGAGATCATTAACAGCGGCAGCATCACCGTGGGAAAAGTCTGTGACTAGCAAGTTCATCCGTAACAATCA  
CCCCTGACCGTGGAAACCTACCTCAAGACTAAGCTGTACTATCGGAACAACGTGACCGTGTGAAGTCTAAGAAGGTG  
AGCGAGGAACTGTACGACCTCGTTAAGCAGTTCACAAACATGATGGAAATCGACCTGGACTCTGTGATGAACCTTGTAA  
GGTACTGAGGGGAAGAAGCACACCTTCTTGAGATGCTTGAGTTCGTGATGAGCAAGGCCAAGAATGTGACCGGTTCT  
GTGGATTTCTCGTGAGCGTGTTCGAAAAAGATGCAGAGGACCAAGACCGACCGTGAGATCTACCTGATGAGCATGAAGG  
TGAAGATGATGCTGTACTTCATCGAGCATACTTCAAGCACGTGGCCAGTCTGATCCTTCTGAGGCTATTAGCATCAGCG  
GCGACAACAAGATTAGGGCTCTGTCTACCCTTAGCTGGACACCATTACCAGCTACAACGACATCTCAACAAGAATAGC  
AAGAAGTCTCGGCTGGCTTTCCTGAGCGTGTATCAATTAAGTGGTCCGCTTCTGACCTGACCTACAAGTACGTGCTGGC  
CATCATTCTGAACCCGATTCTTACTACTGGCGAGGCCTCTTTATGATCGAGTGCATTCTGATGTACGTGAAGCTGAAGAA  
AGTGTGCATCCCGACCGACATTTTCTGAACCTTAGGAAGGCTCAGGGCACCTTCGGTCAAAAACGAAACCGCTATTGGTC  
TGCTGACCAAGGGACTTACCACCAACACTTACCCGGTGTCTATGAACTGGCTGCAGGGTAACTGAACTACCTCTTCT  
GTGTACCCTCTGCGCTATGAAGGCTTACCACAAGACTCTCGAGTGTATAAGGACTGCGACTTTCAGACCCGGTGGAT  
CGTTCACTCTGATGATAACGCAACCAGCCTGATCGCTTCAGGTGAGGTTGACAAGATGCTGACCGACTTCTCCTTTCAT  
CTCTGCCTGAGATGCTGTTGAGATCCATCGAGGCTCACTTCAAGTCTTCTGATCACAACCTCAACCCCAAGAAGTCATAC  
GCCAGTCAAGCGAGGTCGAGTTCATTTCTGAGAGGATTGTGAACGGCGCTATCATCCACTTTACTGCAGGCATCTTGC  
TAACTGCTGCACCGAGTCTCTCACATCTCCTACTTCGATGACCTGATGTCCCTGTCTATCCACGTGACCATGTTGCTGAG  
AAAGGGCTGCCATAATGAGGTGATCCCTTTTGTCTACGGTGTGTGCAAGTGCAGGCTCTCTCTATCTACTCTATGCTGC  
CTGGTGAGGTGAACGACAGCATCCGGATCTTAAAGAAGCTGGGCGTACGCTCAAGTCCAACGAGATTCTACTAACAATG  
GGCGGTTGGCTGACCTCTCCTATTGAGCCTTTGTCTATTCTGGGCCCCAGCAGCAACGACCAGATTATCTACTACAACGT  
GATCCGGGATTTCTGAACAAGAAATCCCTGGAAGAGGTGAAGGACTCCGTGTCCTCATCTTCTTACCTGCAGATGAGGT  
TCAGGGAACCAAGGGCAAGTACGAGAAGGGTACTCTGGAAGAGAAGGACAAAAAGATGATCTTCTTATCAACCTCTTC  
GAGAAGGCCAGCGTGTCCGAGGATAGTGTGCTTACCATCGGGATGAAGTTCAGACCATGCTGACCCAGATCATCAA  
GCTGCCCAACTTCATCAACGAGAACGCCTTGAACAAGATGAGCAGCTACAAGGACTTCTCCAAGCTGTACCCCAACCTCA  
AGAAGAACGAGGATCTGTACAAGTCCACCAAGAACCTCAAAATCGACGAGGACGCTATCCTCGAGGGTGTGAGCTTTAT  
GAGAAGATCGCCAGCAGCCTCGAGATGGAATCTGTGCACGACATCATGATCAAGAACCAGGAAACCTTCTGATCGCTCC  
GCTGAACGATAGGGACTTCTGCTGTCTCAGCTGTTTATGTACACCTTCCGTCTAAGAGGAACCGCTGTCTAATCAGT  
CTACCGAGAAGCTGGCTCTTGATAGGGTGTGAGATCTAAGGCTAGGACCTTCGTGGACATCTCCTTACCGTTAAGATG  
ACCTATGAAGAGAACATGAAAAAAGATCTGGAGATGCTCAAGTTCGATCTCGACAGCTACTGCAGCTTCAAGACTTG  
CGTGAACCTGGTGTGATCAAGGATGTGAACTTCTCCATGCTTATCCGATCCTCGACTCTGCTTATCCTTGGAGTCTAGGAA  
CGGGGACAACCTACAACCTCCGTTGGTTCCAGACTGAGAAGTGGATCCCTGTTGTTGAGGGTCTCTGGACTTGTGGTG

ATGCATGCTGTGTACGGGTCTAACTATATCGAGAACCTCGGCCTTAAGAACATCCCGCTTACCGACGACTCTATCAACGTG  
CTGACTTCTACCTTCGGCACCGGTCTGATTATGGAAGATGTCAAGAGCCTGGTGAAGGGCAAAGACTCATTGAGACAGA  
GGCCTTCAGCAACTCTAACGAGTGCCAGAGACTTGTGAAGGCCTGCAACTACATGATCGCTGCTCAGAACAGGCTCCTG  
GCTATCAATACCTGCTTTACCCGGAAGTCTTTCCCGTTCTACTCCAAGTTCAATCTTGGCAGGGGCTTCATCAGCAACACC  
CTTGCTTTGCTGTCCACCATCTACAGCAAAGAGGAATCCTACCCTTCGTGTCCACCGCCTCTTACAAGCTGGATAAGAC  
TATCCGGACCGTGATCTCTGCACAGCAGGATATGAACCTGGAAAAGATCCTGGATACCGCCGTGTACATCAGCGACAAGC  
TTCAGTCTTTGTTCCCGACCATCACCAGAGAGGACATCGTTCTCATTCTCCAGAACGTGTGCCTGGACTCCAAGCCTATT  
TGGCAGTCTTTGGAGGACAAGATGAAGAAGATTAACAACAGCACCGCCAGCGGCTTACCCTGTCTAATGTGATTCTGAG  
CCACAACCTCCGAGCTGAACACCATCCAGAAAACAGATCGTGTGGATGTGGAACATGGGCCTTTGCTCTCATAGGACCCTGG  
ATTTCTGTATCCGTTACATCAGGCGGTCCGATGTGAGATACGTCAAGACTGAGGAACAGGACGAGAGCGGGAACCTACATT  
AGCGGAACCATGTACAAGATTGGCATCATGACCCGGTCTTGCTACGTGCAGTTGATCGCATCAGATCAGGATGTGGCTGT  
GTCTCTTAGGACCCCTTCGAGATTCTCAACGAGAGGGATTACCTGTTTCGACACCTACCGTGAGTCCATCGAAAAGCTGC  
TGCAAAAAGTTCATGTTTCGACAAGGTCAACATTATCAAGTCTAAGCAGCCGAGATTGTGTTCTCGAGCCAGGTGATGCT  
TGCATTAGGATGACCACCGACAACAAAATGATCGTCAAGGTAAACGCCACCAGCAGGCAGATTAGGCTTGAGAACGTTAA  
GCTGGTGGTGAAGATTAAGTATGAGAACGTGAACCTCCGACGTGTGGGACATCATTGAGAGCCAGAAGTCTCTCGTTCTC  
CGGCTTCTGAAGTTGGTGAGTGTTCAGCGACATGTATAAGACCGCTGACAGCGAGACTGAGACAATCAAGACTGTGA  
AGAACCGGCTGATGACCTCTCTGACCTCATTGAGGCTTTCGGCAACCTCAGCCAGCAGATCAAAGAAATCGTGGACGAT  
GACATCAGGGAAACCATGGACGAGTTCCTCATGAACATCCGTGATACCTGCCTTGAGGGTCTTGAGAATTGCAAGAGCGT  
GGAAGAGTACGACTCCTACCTTGATGAGAACGGGTTC AACGATAACCGTCGAGCTGTTTCGAGAATCTTCTGAGGACCCAC  
GACAACCTCGAGAACGAGTACTCTCCACTGTTTCAGCGAGATCGTGGATAAGGCTAAGCAGTACACCAGGGATCTCGAGG  
GCTTTAAAGAAATCCTGCTGATGCTGAAGTACTCTCTGATCAACGACGCTCCGGGTTC AAGTCATATAGGCTACTGGTA  
TGCACGCCGTTGAGCTGATGGCTAAGAAACACATTGAGATCGGGCAGTTCAACCTGCTGGGTATGATTCAAGCTTATCAAG  
GCTTTCGAGACTTGCCACAACAACGACTCCATTCTCAACCTGGCCAGCCTTAGGAATGTGCTGTCTAGGACTTACGCTAC  
TTTCGGCAGGCGGATCAGGTTGAATCACGATCTGGATCTGCAGAAACCTTATGGAAAAGAGCTACGACTTCAAGACCT  
TGGTGTCCCCGAGATTAAGCTCTCTGAGCTGAGCAGGAAATCCTGAAAGAGAACGGCTTCGTTATCTCCGGCGAGAA  
CCTTAAGATGGACAGGTCCGATGAAGAGTTCGAGGGGCTCGCTTCATTCAATGTGCTTAGGTTGGACGAGGAAGAGATG  
TACGAGGGGCTGATCAAAGAAATGAAGATCAAGCGGAAGAAGAAGGGCTCTCTGTTCCCTGCTAATACCTGCTTCTGTG  
CGAGTTGATCAAGTTCCTGATCGGGCGGTATTAAGGGCACCAGCTTCGATATTGAGACTCTGCTCCGGAACCTCATTAGGC  
CGGATATCTTCTACCGACAGGCTTGGTAGGCTCTCTTCTTCTGTGCCTGCTCTTAAGGTGTACGCCACTGTGTACATGG  
AGTACAAGAACGTCAACTGCCCTCTGAACGAGATCGCCGATTCTTTGAGGGTTACCTGAAGCTCACCAAGTCCAAGAG  
CAAAGAACACTTCTTGAGCGCAGGGTGAAGAAGGCTCTTATTAGTTGAGGGACGAGCAGTCCAGGACCAAAAAGCTC  
GAGGTCTACAAGGATATCGCCAACCTTCTTAGCAGGCACCTCTTTGCTGTCTGAAAAGACACTGTACGGCCGGTACAC  
CTACAGCGATATCAACGATTACATCATGCAGACCCGGGAAATCATCTCTCTAAGATCTCCGAGTTGGATGAGGTGGTGG  
AAACTGACGAGGACAACCTCCTGCTCTTACCTTAGGGGCGAAGAGGATGCTTTCGATGAGGACGATTCTGATGAGGA  
AGAGGACACCGATTAG

**Fig. S10. Optimized GP gene sequence used in the study.**

ATGAGGATCCTGAAGCTTCTTGAGCTGGTGGTGAAGGTGAGCCTGTTACCATTGCTCTGTCTCTGTGCTTCTGGCCTT  
CCTTATTTTCAGGGCTACCGACGCTAAGGTCGAGATCATTAGAGGGCGATCATCCTGAGGTGTACGACGACTCTGTGAGA  
ATGAAGTTCCTACCGCTGCTAGCATTACAGCGGAAGGCTATTCTTGAGACTCTGACCTCTCTGATGCTCGAGTCTCAA  
CCTGGAACCAGGCAGATTCTGTGAGGAAGAGTCTACCATTCTATCTTCGCTGGCAGCACTACCCAGAAGATTATCTCCGT  
TAGCGACCTGCCTAACAACCTGCCTGAACGCTTCTCTGAGTGCAGATCAAGGGCATCAGCACCTACAACGTTACT  
ACCAGGTGCGAACAACGGCGTGATCTACTCTTGCGTGTGAGATTCTGTGAGGGCCTTGAGAAGTGCAGAACTCTCT  
TAACCTGCCGAAGCGGTTCTTAAGGTGCCAGTGATTCTATACCAAGCTGGACAACAAGCGGCACTCTCTGTGGGCA  
CCAAGTTCTTATTAGCGAGTCTCTGACCCAGGACAACCTACCGATTACCTACAACAGCTACCCCTACCAACGGAACCGTG  
TCTCTTCAGACCGTTAAGCTGTCTGGCGATTGCAAGATCACCAAGAGCAACTTCGCTAACCCGTATACCGTGAGCATTAC  
CTCTCCAGAGAAGATCATGGGCTACCTGATCAAGAACGCTGGCGAAAACGCTGAGCACAAGGTGATCTCATTCTCCGGCT  
CTGCTTCCATTACCTTACCGAAGAGATGCTGGATGGTGGAGCACAACTTCTCTGCGGTGATAAGTCTGCTAAGATCCCT  
AAGACCAACAAGCGTGTGAGGGACTGCATCATCAAGTACAGCAAGAGCATCTACAAGCAGACCGCCTGCATCAACTTCT  
TTGGATTAGGCTGATCCTGATCGCCCTGCTGATCTACTTCCCTATTAGATGGCTGGTGAACAAGACCACCAAGCCGCTTTT  
CTGTGGTACGATCTGATCGGCCTGATTACTTACCCAATCTGCTGCTGATTAAGTGCCTGTGGAAGTACTTTCCGTTCAA  
GTGCAGCAACTGCGGCAACCTGTGATTATTACTCACGAGTGCACCAAGATCTGCATCTGCAACAAGAGCAAGGCCAGC  
AAAGAACACTCTAGCGAGTGCCGATCCTGAGCAAAGAAACCGATCACGACTACAACAAGCACAAGTGGACCAGCATGG  
AATGGTTCCACCTTATCGTGAACACCAAGCTCAGCTTACGCTGCTTAAAGTTCGTGACCGAGATTCTGATCGGTCTGGTG  
ATCCTTAGCCAGATGCCTATGTCTATGGTCTAGACTACCCAGTGCCTTAGCGGTTGCTTTTATGTTCTGGTTGCCCTGTG  
CTGGTGACCTCTAAGTTTGAAGTGCCTGAGAAGGACCAGTGTACTGCAACGTGAAAGAGGACAAGATCATCGAGT  
CCATCTTCGGCACCAACATCGTGATTGAGGGTCTAACGACTGCATCGAGAACCAGAATTGTGTGGCTCACCCGAGCATC  
GACAACCTGATTAAGTGTAGACTGGGCTGCGAGTACCTGGACCTGTTTAGAAAACAAGCCTCTGTACAACGGCTTCAGCGA  
CTACACCGGTTCTTCACTTGGTCTTACCTCTGTGGGACTGTACGAGGCTAAGAGGCTTAGGAACGGCATCATCGACTCTT  
ACAACCGGACCGATAAGATCAGCGGTATGATCGTGGTGGTACAGCCTGGATAAGAACGAGACTTCTATCCCGAGAACATC  
CTGCCAAGGCAGTCTCTGATTTTCTGACTCTGTGGTGGATGGCAAGTACCGGTATATGGTTGAGCAGAGCCTTCTTGGAGG  
TGGTGGAACTGTGTTTATGCTGAACGATAAGACCTCTGAGAAGGCCAAGAAGTTCGTATCTACATCAAGAGCGTGGGC  
ATCCACTACGAGGTGTCAGAGAAGTATAACCACCGCTCTATTTCAGTCTACCCACACCGATTCTACTCTACCTGCACCGGT  
AATTGCGATACCTGCAGAAAGAACCAGGCTCTGACAGGCTTTCAGGACTTCTGCATTACCCCTACCTCTTACTGGGGTTG  
TGAAGAGGCTTGGTGCTTCGCTATTAACGAGGGTGTACTTGGCGCTTCTGCCGAATATCTACGACATGGACAAGAGCT  
ACCGGATCTACAGCGTGCTGAAGTCTACTATCGTTGCCGACGTGTGCATCTCCGGTATTCTTGGTGGACAGTGTCTAGG  
ATTACCGAAGAGGTTCCATACGAGAACGCTCTGTTCAGGCTGATATTCAGGCTGATCTGCACAACGATGGCATCACCAT  
TGGTGGAGCTTATTGCTCACGGACCGGACAGCCATATCTACTCCGGTAACATTGCTAACCTGAACGACCCGGTGAAGATGT  
TCGGTCATCCTCAGCTTACTCATGACGGCGTGCCAACTTACCAAGAAAACCTTGAGGGCGACGACATGTCTTGGGAT  
TGTGCTGCTATCGGCAAGAAGTCCATCACCATCAAGACCTGCGGTTACGACACTTACAGGTTACAGGTTCTGGTCTTGAGCA  
GATCTCTGACATCCCCATCAGCTTCAAGGACTTACAGCTCATTCTTCTGAAAAGAGCTTACAGCTTGGGGAAGCTGAAGA  
TCGTGGTGGATCTGCCTAGCGATCTTTTCAAGGTTGACCTAAGCGGCCGTCTATCACTTCTACTAGGCTTAACTGCAAC  
GGCTGCCTTCTTGTGGTACAGGCCTTCTTGCATCCTCGAGTCTTCTCTGATCTGACCTTACGACCGCCATCTCTATC

GATGCTTGCTCTTTGTCTACCTACCAGCTGGCTGTGAAGAAGGGCAGCAACAAGTACAACATCACCATGTTCTGCAGCGC  
AAACCCGGACAAGAAAAAGATGACTCTGTACCCTGAGGGCAACCCCGATATTTCTGTTGAGGTGCTCGTGAACAACGTG  
ATCGTTGAGGAACCTGAGAACATCATCGATCAGAACGACGAGTACGCTCACGAGGAACAGCAGTACAACAGCGATTTCATC  
TGCTTGGGGATTCTGGGATTACATCAAGTCCCCGTTCAACTTCATTGCCAGCTACTTCGGCAGCTTCTTCGATAACAATCAG  
GGTGATCCTGCTTATCGCCTTCATCTTCCTGGTTATCTACTTCTGCAGCATCCTGACCACCATCTGCAAGGGTTACGTGAA  
GAACAAGTCCTACAAGAGCCGGTCCAAGATCGAGGATGATGACGACTCAGAGATTAAGGCCCCGATGCTGATGAAGGAC  
ACTATGACTAGAAGGGCGCCTCCGATGGATTCTCTCATCTTGTTAG

**Table S1. The predicted intron splicing sites of wild-type RdRp gene.**

| Position (bp) | Putative splice site          | Sequence             | Score* | Intron GC* | Activations** |              | Confidence** |
|---------------|-------------------------------|----------------------|--------|------------|---------------|--------------|--------------|
|               |                               |                      |        |            | Alt./Cryptic  | Constitutive |              |
| 69            | Alt. isoform/cryptic donor    | TGAGGATTGCgtggcgagca | 4.835  | 0.529      | 0.954         | 0.035        | 0.963        |
| 175           | Alt. isoform/cryptic donor    | GAGACTATGCgtgagctgat | 4.841  | 0.514      | 0.933         | 0.051        | 0.946        |
| 205           | Constitutive donor            | ACTGCTGATGgtgagggtct | 12.212 | 0.500      | 0.370         | 0.546        | 0.322        |
| 223           | Alt. isoform/cryptic donor    | CTGAACAAAgtatggctac  | 10.886 | 0.500      | 0.802         | 0.142        | 0.823        |
| 261           | Alt. isoform/cryptic donor    | GTCTGAGATGgtgtctctgt | 5.341  | 0.486      | 0.882         | 0.086        | 0.903        |
| 280           | Alt. isoform/cryptic acceptor | gttcgagcagAAGTACCTTG | 5.730  | 0.514      | 0.943         | 0.055        | 0.942        |
| 281           | Alt. isoform/cryptic donor    | TCGAGCAGAAgtaccttgag | 5.847  | 0.500      | 0.816         | 0.135        | 0.834        |
| 336           | Constitutive acceptor         | ttattctagGCACCTGAGG  | 4.932  | 0.486      | 0.212         | 0.770        | 0.725        |
| 579           | Alt. isoform/cryptic acceptor | tggatgccagGACTGAGACT | 4.087  | 0.500      | 0.696         | 0.295        | 0.576        |
| 602           | Alt. isoform/cryptic donor    | CCATGGAAAgtactacaag  | 6.059  | 0.457      | 0.939         | 0.044        | 0.953        |
| 642           | Alt. isoform/cryptic donor    | GGACATCAAGgtgaacggca | 7.873  | 0.514      | 0.821         | 0.135        | 0.835        |
| 681           | Alt. isoform/cryptic donor    | TCCTGTGTTcgtgagcatcg | 6.292  | 0.529      | 0.839         | 0.123        | 0.853        |
| 738           | Alt. isoform/cryptic acceptor | tgaccttagCAGAGTGCTC  | 3.060  | 0.500      | 0.836         | 0.157        | 0.812        |
| 741           | Alt. isoform/cryptic acceptor | cctctagcagAGTGCTCGAG | 3.393  | 0.514      | 0.762         | 0.227        | 0.703        |
| 831           | Alt. isoform/cryptic donor    | CATTTCACgtgggtcaga   | 5.665  | 0.500      | 0.943         | 0.042        | 0.955        |
| 835           | Alt. isoform/cryptic donor    | TCTCACGTGGgtcagatcgt | 6.026  | 0.500      | 0.936         | 0.048        | 0.949        |
| 843           | Alt. isoform/cryptic donor    | GGGTCAGATCgtgggtacta | 5.056  | 0.514      | 0.903         | 0.074        | 0.918        |
| 864           | Alt. isoform/cryptic donor    | TCCTACTGTGgtgaggaact | 11.320 | 0.500      | 0.901         | 0.072        | 0.920        |
| 906           | Alt. isoform/cryptic donor    | CAAGTCCGAGgttaggggta | 10.127 | 0.514      | 0.709         | 0.226        | 0.682        |
| 913           | Alt. isoform/cryptic donor    | GAGGTTAGGGgtatcctggg | 4.945  | 0.514      | 0.953         | 0.032        | 0.967        |
| 971           | Alt. isoform/cryptic donor    | GGACCTCCAgtacaaagag  | 5.665  | 0.514      | 0.934         | 0.049        | 0.948        |
| 1185          | Alt. isoform/cryptic donor    | CGAGCCTAAGgtggacctgg | 4.643  | 0.514      | 0.716         | 0.215        | 0.700        |
| 1207          | Alt. isoform/cryptic acceptor | tgatcttaagGATCACCTGA | 2.743  | 0.500      | 0.596         | 0.388        | 0.349        |
| 1249          | Alt. isoform/cryptic donor    | AGCCTGTACGgtaagcacct | 11.990 | 0.457      | 0.579         | 0.329        | 0.431        |
| 1361          | Alt. isoform/cryptic donor    | ACGAAGAGAAgtacccgaac | 5.393  | 0.529      | 0.904         | 0.069        | 0.923        |
| 1388          | Alt. isoform/cryptic donor    | CCAACGACCTgtcagagaca | 5.572  | 0.500      | 0.910         | 0.068        | 0.925        |
| 1421          | Alt. isoform/cryptic donor    | CTATGACCTGgtcaccgagc | 5.097  | 0.471      | 0.952         | 0.036        | 0.962        |
| 1492          | Alt. isoform/cryptic donor    | AACAAGTTCCgtgagagctt | 6.085  | 0.500      | 0.565         | 0.376        | 0.334        |
| 1515          | Alt. isoform/cryptic acceptor | agtccagcagCAGGGTGATC | 2.527  | 0.486      | 0.940         | 0.057        | 0.939        |
| 1542          | Alt. isoform/cryptic acceptor | gcccttacagCTGCATTAAC | 3.273  | 0.486      | 0.526         | 0.454        | 0.136        |

|      |                               |                       |        |       |       |       |       |
|------|-------------------------------|-----------------------|--------|-------|-------|-------|-------|
| 1587 | Alt. isoform/cryptic donor    | CACTAACCTTgtgaggettt  | 7.336  | 0.514 | 0.944 | 0.040 | 0.958 |
| 1672 | Constitutive donor            | ATCAACACCGtagcattaa   | 5.999  | 0.500 | 0.395 | 0.516 | 0.233 |
| 1740 | Constitutive acceptor         | gcctactagGAACAAGAAC   | 7.612  | 0.529 | 0.146 | 0.841 | 0.827 |
| 1801 | Alt. isoform/cryptic acceptor | ctactcaagGGTCTTGCCG   | 3.996  | 0.471 | 0.717 | 0.270 | 0.624 |
| 1889 | Alt. isoform/cryptic donor    | AGGGCCTCGAgtacatact   | 5.278  | 0.500 | 0.956 | 0.032 | 0.966 |
| 2006 | Alt. isoform/cryptic donor    | CACTTTCTTGgtcgagcga   | 6.544  | 0.529 | 0.958 | 0.031 | 0.968 |
| 2125 | Alt. isoform/cryptic acceptor | gtacatccagGATTCTGTGC  | 6.304  | 0.514 | 0.555 | 0.432 | 0.222 |
| 2205 | Alt. isoform/cryptic acceptor | accactacagCGAGGACATG  | 4.878  | 0.457 | 0.847 | 0.147 | 0.827 |
| 2230 | Alt. isoform/cryptic acceptor | gttctccaagGGTTTGATGG  | 2.346  | 0.471 | 0.692 | 0.290 | 0.580 |
| 2321 | Constitutive acceptor         | gcttccaagGCGACGGTAT   | 6.287  | 0.457 | 0.385 | 0.587 | 0.344 |
| 2326 | Alt. isoform/cryptic donor    | AAAGGCGACGgtatgaacac  | 7.959  | 0.486 | 0.760 | 0.181 | 0.761 |
| 2487 | Constitutive donor            | GCTTAACCAggtgaggettc  | 14.109 | 0.500 | 0.246 | 0.676 | 0.637 |
| 2512 | Alt. isoform/cryptic acceptor | actgttcaagACCCCTTCTA  | 4.626  | 0.514 | 0.933 | 0.062 | 0.933 |
| 2523 | Alt. isoform/cryptic donor    | CCCTTCTAAGgtgccagttt  | 10.939 | 0.471 | 0.614 | 0.306 | 0.501 |
| 2545 | Alt. isoform/cryptic acceptor | cttgcaccagTTCAGCAAAA  | 6.490  | 0.529 | 0.692 | 0.300 | 0.566 |
| 2550 | Alt. isoform/cryptic acceptor | cccagttcagCAAAAAGGCC  | 4.578  | 0.500 | 0.800 | 0.194 | 0.758 |
| 2601 | Alt. isoform/cryptic donor    | CATTGAGAAAGgtcaacgtgt | 6.294  | 0.500 | 0.944 | 0.041 | 0.956 |
| 2664 | Constitutive acceptor         | tgttctccagCGTGATGATT  | 6.507  | 0.486 | 0.462 | 0.524 | 0.117 |
| 2720 | Alt. isoform/cryptic donor    | ACTTCATGAGgtacgtggt   | 9.451  | 0.543 | 0.706 | 0.226 | 0.680 |
| 2765 | Alt. isoform/cryptic donor    | ACATCAAAGAgtacatccgg  | 4.583  | 0.500 | 0.944 | 0.041 | 0.956 |
| 2942 | Constitutive donor            | TGAACATCAAgtgccctatt  | 6.540  | 0.500 | 0.357 | 0.573 | 0.378 |
| 3217 | Alt. isoform/cryptic donor    | TACTACCTGGtaacatcga   | 6.561  | 0.500 | 0.885 | 0.083 | 0.906 |
| 3292 | Alt. isoform/cryptic acceptor | gtgetacaagATCTCTACCC  | 3.251  | 0.514 | 0.960 | 0.038 | 0.961 |
| 3307 | Alt. isoform/cryptic acceptor | taccctgaagTCCAGTAAGA  | 3.209  | 0.500 | 0.930 | 0.067 | 0.928 |
| 3310 | Alt. isoform/cryptic donor    | CTGAAGTCCAgtaagaagtg  | 9.173  | 0.471 | 0.712 | 0.218 | 0.694 |
| 3370 | Constitutive acceptor         | gtgcctgcagAACGCAAAGA  | 3.539  | 0.500 | 0.477 | 0.500 | 0.047 |
| 3557 | Alt. isoform/cryptic donor    | CCGTGGGAAAgctctgtgact | 6.027  | 0.500 | 0.919 | 0.059 | 0.935 |
| 3642 | Alt. isoform/cryptic donor    | TCGGAACAACgtgaccgtgc  | 5.533  | 0.500 | 0.919 | 0.061 | 0.934 |
| 3666 | unclassified donor            | GTCTAAGAAGgtgagcgagg  | 13.918 | 0.500 | 0.418 | 0.490 | 0.000 |
| 3745 | Alt. isoform/cryptic donor    | ATGAACCTTGgtaagggtac  | 11.753 | 0.500 | 0.609 | 0.303 | 0.502 |
| 3751 | Alt. isoform/cryptic donor    | CTTGTAAGGgtactgaggg   | 6.065  | 0.500 | 0.952 | 0.033 | 0.966 |
| 3784 | Constitutive acceptor         | cttctgcagATGCTTGAGT   | 7.888  | 0.514 | 0.201 | 0.782 | 0.742 |
| 3816 | Alt. isoform/cryptic donor    | GGCCAAGAATgtgaccggtt  | 6.207  | 0.543 | 0.936 | 0.047 | 0.950 |

|      |                               |                       |        |       |       |       |       |
|------|-------------------------------|-----------------------|--------|-------|-------|-------|-------|
| 3840 | Alt. isoform/cryptic donor    | GGATTCCTCgtgagcgtgt   | 5.915  | 0.514 | 0.899 | 0.079 | 0.912 |
| 3880 | Alt. isoform/cryptic donor    | AAGACCGACCgtgagatcta  | 5.588  | 0.457 | 0.542 | 0.380 | 0.299 |
| 3906 | Alt. isoform/cryptic donor    | GAGCATGAAAGgtgaagatga | 8.763  | 0.500 | 0.560 | 0.358 | 0.361 |
| 4023 | Alt. isoform/cryptic acceptor | ctacccttagCCTGGACACC  | 6.193  | 0.514 | 0.626 | 0.365 | 0.416 |
| 4136 | Alt. isoform/cryptic donor    | TGACCTACAAGtacgtgctg  | 9.678  | 0.500 | 0.596 | 0.323 | 0.459 |
| 4211 | Alt. isoform/cryptic donor    | GCATTCTGATgtacgtgaag  | 7.123  | 0.514 | 0.847 | 0.112 | 0.868 |
| 4230 | Alt. isoform/cryptic donor    | GCTGAAGAAAgtgtgcatcc  | 6.203  | 0.529 | 0.934 | 0.048 | 0.949 |
| 4266 | Alt. isoform/cryptic acceptor | tgaaccttagGAAGGCTCAG  | 7.185  | 0.457 | 0.849 | 0.138 | 0.837 |
| 4306 | Alt. isoform/cryptic donor    | ACCGCTATTGgtctgctgac  | 5.056  | 0.529 | 0.865 | 0.097 | 0.888 |
| 4344 | Alt. isoform/cryptic donor    | CACTTACCCGgtgtctatga  | 6.061  | 0.514 | 0.900 | 0.077 | 0.914 |
| 4366 | Alt. isoform/cryptic donor    | TGGCTGCAGGgtaacctgaa  | 6.041  | 0.500 | 0.750 | 0.183 | 0.755 |
| 4414 | Alt. isoform/cryptic acceptor | cgctatgaagGCTTACCACA  | 3.152  | 0.514 | 0.945 | 0.052 | 0.945 |
| 4459 | Alt. isoform/cryptic acceptor | cgactttagACCCGGTGGA   | 3.313  | 0.500 | 0.787 | 0.200 | 0.746 |
| 4510 | Constitutive donor            | ATCGCTTCAGgtgaggttga  | 11.745 | 0.500 | 0.262 | 0.665 | 0.607 |
| 4511 | Constitutive acceptor         | atcgcttagGTGAGGTGA    | 6.293  | 0.529 | 0.441 | 0.541 | 0.185 |
| 4701 | Constitutive acceptor         | tttactgcagGCATCTTGCT  | 8.159  | 0.514 | 0.411 | 0.576 | 0.288 |
| 4773 | Alt. isoform/cryptic donor    | GTCTATCCACgtgaccatgt  | 6.070  | 0.529 | 0.520 | 0.403 | 0.224 |
| 4809 | Alt. isoform/cryptic donor    | CCCTAATGAGgtgatccctt  | 6.780  | 0.529 | 0.856 | 0.106 | 0.877 |
| 4873 | Alt. isoform/cryptic donor    | ATGCTGCCTGgtgaggtgaa  | 9.597  | 0.529 | 0.762 | 0.188 | 0.753 |
| 4878 | Alt. isoform/cryptic donor    | GCCTGGTGAGgtgaacgaca  | 5.312  | 0.500 | 0.940 | 0.044 | 0.953 |
| 5001 | Alt. isoform/cryptic acceptor | tgggccccagCAGCAACGAC  | 4.531  | 0.529 | 0.765 | 0.227 | 0.703 |
| 5004 | Alt. isoform/cryptic acceptor | gccccagcagCAACGACCAG  | 3.016  | 0.529 | 0.837 | 0.157 | 0.813 |
| 5067 | Alt. isoform/cryptic donor    | CCTGGAAGAGgtgaaggact  | 8.199  | 0.514 | 0.764 | 0.180 | 0.764 |
| 5104 | Alt. isoform/cryptic acceptor | ttacctgcagATGAGGTTC   | 11.438 | 0.514 | 0.591 | 0.398 | 0.325 |
| 5140 | Alt. isoform/cryptic donor    | TACGAGAAGGgtactctgga  | 5.097  | 0.471 | 0.916 | 0.059 | 0.936 |
| 5263 | Alt. isoform/cryptic acceptor | gctgaccagATCATCAAGC   | 2.350  | 0.557 | 0.593 | 0.388 | 0.345 |
| 5416 | Alt. isoform/cryptic donor    | ATCCTCGAGGgtgatgagct  | 5.258  | 0.471 | 0.829 | 0.126 | 0.848 |
| 5542 | Alt. isoform/cryptic acceptor | gctgtctcagCTGTTCATGT  | 8.742  | 0.500 | 0.683 | 0.304 | 0.555 |
| 5549 | Alt. isoform/cryptic donor    | AGCTGTTCATgtacacctct  | 5.135  | 0.514 | 0.868 | 0.098 | 0.887 |
| 5569 | Alt. isoform/cryptic acceptor | tccgtetaagAGGAACCAGC  | 3.653  | 0.514 | 0.927 | 0.070 | 0.924 |
| 5616 | Alt. isoform/cryptic acceptor | ctcttgatagGGTGTGAGA   | 3.796  | 0.486 | 0.802 | 0.185 | 0.769 |
| 5616 | Alt. isoform/cryptic donor    | TCTTGATAGgtgtttgagat  | 4.789  | 0.457 | 0.911 | 0.062 | 0.931 |
| 5668 | Alt. isoform/cryptic acceptor | taccgtaagATGACCTATG   | 4.339  | 0.500 | 0.796 | 0.196 | 0.754 |

|      |                               |                       |        |       |       |       |       |
|------|-------------------------------|-----------------------|--------|-------|-------|-------|-------|
| 5730 | Alt. isoform/cryptic acceptor | atctegacagCTACTGCAGC  | 3.975  | 0.414 | 0.845 | 0.148 | 0.825 |
| 5829 | Alt. isoform/cryptic acceptor | gcgagtctagGAAGCGGGAC  | 4.419  | 0.486 | 0.590 | 0.389 | 0.340 |
| 5863 | Alt. isoform/cryptic acceptor | ttggttcagACTGAGAAGT   | 7.317  | 0.543 | 0.600 | 0.390 | 0.350 |
| 5921 | Alt. isoform/cryptic donor    | TGCATGCTGTgtacgggtct  | 4.883  | 0.500 | 0.957 | 0.031 | 0.968 |
| 6139 | Alt. isoform/cryptic acceptor | cgctgctcagAACAGGCTCC  | 2.442  | 0.529 | 0.816 | 0.176 | 0.784 |
| 6199 | Alt. isoform/cryptic acceptor | ctactccaagTTC AATCTTG | 4.578  | 0.529 | 0.930 | 0.066 | 0.929 |
| 6213 | Alt. isoform/cryptic acceptor | atcttggcagGGGCTTCATC  | 4.671  | 0.500 | 0.678 | 0.310 | 0.543 |
| 6258 | Alt. isoform/cryptic acceptor | ccatctacagCAAAGAGGAA  | 4.973  | 0.500 | 0.822 | 0.171 | 0.793 |
| 6337 | Alt. isoform/cryptic acceptor | ctctgcacagCAGGATATGA  | 3.577  | 0.529 | 0.610 | 0.372 | 0.390 |
| 6340 | Alt. isoform/cryptic acceptor | tgcacagcagGATATGAACC  | 5.307  | 0.543 | 0.575 | 0.395 | 0.313 |
| 6420 | Alt. isoform/cryptic acceptor | ccatcaccagAGAGGACATC  | 2.479  | 0.514 | 0.962 | 0.036 | 0.963 |
| 6445 | Constitutive acceptor         | cattctcagAACGTGTGCC   | 9.539  | 0.500 | 0.209 | 0.784 | 0.733 |
| 6624 | Constitutive acceptor         | gctctcatagGACCCTGGAT  | 10.048 | 0.500 | 0.176 | 0.817 | 0.784 |
| 6654 | Alt. isoform/cryptic acceptor | gttacatcagGCGGTCCGAT  | 3.376  | 0.500 | 0.765 | 0.221 | 0.712 |
| 6663 | Alt. isoform/cryptic donor    | GCGGTCCGATgtgagatacg  | 6.227  | 0.486 | 0.936 | 0.047 | 0.950 |
| 6722 | Alt. isoform/cryptic donor    | GCGGAACCATgtacaagatt  | 5.221  | 0.514 | 0.960 | 0.028 | 0.971 |
| 6763 | Alt. isoform/cryptic acceptor | ctacgtgcagTTGATCGCAT  | 5.764  | 0.529 | 0.844 | 0.148 | 0.824 |
| 6801 | Constitutive acceptor         | tgtctcttagGACCCCTTTC  | 5.629  | 0.514 | 0.255 | 0.731 | 0.652 |
| 6850 | Alt. isoform/cryptic donor    | GACACCTACCgtgagtcct   | 8.138  | 0.443 | 0.627 | 0.307 | 0.511 |
| 6894 | Alt. isoform/cryptic donor    | GTTGACAAGgtcaacatta   | 6.897  | 0.471 | 0.855 | 0.108 | 0.874 |
| 6895 | Alt. isoform/cryptic acceptor | gttcgacaagGTCAACATTA  | 2.380  | 0.486 | 0.870 | 0.126 | 0.855 |
| 6943 | Alt. isoform/cryptic donor    | CTCGAGCCAGgtgatgcttg  | 8.185  | 0.486 | 0.833 | 0.125 | 0.850 |
| 6944 | Alt. isoform/cryptic acceptor | ctcgagccagGTGATGCTTG  | 5.597  | 0.457 | 0.761 | 0.232 | 0.696 |
| 6960 | Constitutive acceptor         | cttgcatagGATGACCACC   | 2.622  | 0.471 | 0.452 | 0.510 | 0.115 |
| 6990 | unclassified donor            | GATCGTCAAGgttaacgcca  | 6.349  | 0.471 | 0.500 | 0.414 | 0.000 |
| 7038 | Alt. isoform/cryptic donor    | TAAGCTGGTgtgaagatta   | 5.500  | 0.471 | 0.942 | 0.041 | 0.957 |
| 7071 | Alt. isoform/cryptic donor    | GAACCTCCGACgtgtgggaca | 4.732  | 0.543 | 0.918 | 0.059 | 0.936 |
| 7124 | Alt. isoform/cryptic acceptor | cttctgaagTTGGTGAGTG   | 3.877  | 0.543 | 0.743 | 0.247 | 0.667 |
| 7126 | Alt. isoform/cryptic donor    | CCTGAAGTTGgtgagtgtct  | 12.153 | 0.500 | 0.727 | 0.210 | 0.711 |
| 7242 | Alt. isoform/cryptic acceptor | gcaacctcagCCAGCAGATC  | 3.540  | 0.500 | 0.601 | 0.379 | 0.370 |
| 7355 | Alt. isoform/cryptic donor    | GCGTGAAGAgtagactec    | 4.790  | 0.514 | 0.943 | 0.040 | 0.957 |
| 7464 | Alt. isoform/cryptic acceptor | cactgttcagCGAGATCGTG  | 6.043  | 0.529 | 0.637 | 0.349 | 0.453 |
| 7535 | Alt. isoform/cryptic donor    | TGATGCTGAAgtactctctg  | 4.763  | 0.529 | 0.907 | 0.069 | 0.924 |



|      |                               |                      |       |       |       |       |       |
|------|-------------------------------|----------------------|-------|-------|-------|-------|-------|
| 7585 | Alt. isoform/cryptic donor    | AGAGCTACTGgtatgcacgc | 9.638 | 0.500 | 0.752 | 0.188 | 0.750 |
| 7648 | Alt. isoform/cryptic donor    | AACCTGCTGGgtatgattca | 7.568 | 0.500 | 0.698 | 0.229 | 0.672 |
| 7722 | Alt. isoform/cryptic acceptor | ccagccttagGAATGTGCTG | 3.055 | 0.500 | 0.807 | 0.185 | 0.771 |
| 7758 | Alt. isoform/cryptic acceptor | ctttcgccagCCGGATCAGG | 6.039 | 0.514 | 0.607 | 0.379 | 0.375 |
| 7792 | Alt. isoform/cryptic acceptor | ggatctgcagAACAACTTA  | 3.876 | 0.514 | 0.696 | 0.289 | 0.586 |
| 7922 | Alt. isoform/cryptic donor    | AGATGGACAGgtccgatgaa | 6.684 | 0.514 | 0.941 | 0.042 | 0.955 |
| 7968 | Constitutive acceptor         | atgtccttagGTTGGACGAG | 2.272 | 0.529 | 0.343 | 0.637 | 0.461 |
| 8169 | Alt. isoform/cryptic acceptor | ctaccgacagGCTTGGTAGG | 8.327 | 0.529 | 0.960 | 0.038 | 0.961 |
| 8173 | Alt. isoform/cryptic donor    | GACAGGCTTGtagctctc   | 8.257 | 0.486 | 0.774 | 0.169 | 0.782 |
| 8205 | Alt. isoform/cryptic donor    | TGCTCTAAGgtgtaccca   | 6.332 | 0.514 | 0.932 | 0.049 | 0.948 |
| 8206 | Alt. isoform/cryptic acceptor | tgetcttaagGTGTACGCCA | 5.395 | 0.514 | 0.524 | 0.455 | 0.133 |
| 8331 | Alt. isoform/cryptic acceptor | tgagcggcagGGTGAAGAAG | 5.008 | 0.514 | 0.856 | 0.139 | 0.838 |
| 8353 | Alt. isoform/cryptic acceptor | tcttattcagTTGAGGGACG | 2.472 | 0.500 | 0.856 | 0.133 | 0.845 |
| 8418 | Alt. isoform/cryptic acceptor | acttccttagCAGGCACCTT | 2.679 | 0.500 | 0.944 | 0.052 | 0.945 |
| 8421 | Alt. isoform/cryptic acceptor | tccttagcagGCACCTCTT  | 6.406 | 0.514 | 0.782 | 0.208 | 0.734 |
| 8459 | Alt. isoform/cryptic donor    | TGTACGGCCGgtacacctac | 4.997 | 0.471 | 0.903 | 0.074 | 0.918 |
| 8472 | Alt. isoform/cryptic acceptor | acacctacagCGATATCAAC | 3.154 | 0.543 | 0.614 | 0.363 | 0.409 |
| 8497 | Alt. isoform/cryptic acceptor | catcatgcagACCCGGGAAA | 2.271 | 0.471 | 0.944 | 0.053 | 0.944 |
| 8521 | Constitutive acceptor         | cctctetaagATCTCCGAGT | 5.017 | 0.500 | 0.424 | 0.562 | 0.245 |
| 8538 | Alt. isoform/cryptic donor    | GTTGGATGAGgtgtgga    | 4.678 | 0.529 | 0.945 | 0.039 | 0.958 |
| 8583 | Constitutive acceptor         | cttaccttagGGGCGAAGAG | 8.039 | 0.486 | 0.196 | 0.792 | 0.753 |

The putative intron splicing sites of wild-type RdRp gene sequence was predicted by Alternative Splice Site

Predictor (ASSP) (<http://wangcomputing.com/assp/>).

\* Scores of the preprocessing models reflecting splice site strength, i.e. a PSSM for putative acceptor sites, and an MDD model for putative donor sites. Intron GC values correspond to 70 nt of the neighboring intron.

\*\* Activations are output values of the backpropagation networks used for classification. High values for one class with low values of the other class imply a good classification. Confidence is a simple measure expressing the differences between output activations. Confidence ranges between zero (undecided) to one (perfect classification).



**Table S2. The predicted intron splicing sites of wild-type GP gene.**

| Position (bp) | Putative splice site          | Sequence              | Score* | Intron GC* | Activations** |              | Confidence** |
|---------------|-------------------------------|-----------------------|--------|------------|---------------|--------------|--------------|
|               |                               |                       |        |            | Alt./Cryptic  | Constitutive |              |
| 36            | unclassified donor            | GGTGGTGAAGgtgagcctgt  | 13.078 | 0.514      | 0.408         | 0.496        | 0.000        |
| 93            | Constitutive acceptor         | ttatttcagGGCTACCGAC   | 11.782 | 0.500      | 0.182         | 0.810        | 0.775        |
| 183           | Alt. isoform/cryptic acceptor | ccgctgetagCATTACAGCGG | 3.056  | 0.500      | 0.929         | 0.067        | 0.928        |
| 259           | Alt. isoform/cryptic donor    | AGGCAGATTCgtgaggaaga  | 4.761  | 0.500      | 0.860         | 0.108        | 0.875        |
| 297           | Alt. isoform/cryptic acceptor | tcgctggcagCACTACCCAG  | 5.498  | 0.514      | 0.952         | 0.046        | 0.952        |
| 318           | Alt. isoform/cryptic donor    | GATTATCTCCgttagcgacc  | 4.792  | 0.529      | 0.928         | 0.056        | 0.940        |
| 324           | Alt. isoform/cryptic acceptor | tctccgttagCGACCTGCCT  | 2.244  | 0.471      | 0.679         | 0.308        | 0.547        |
| 364           | Alt. isoform/cryptic acceptor | atctctgaagTGCAGAGATCA | 3.458  | 0.500      | 0.845         | 0.145        | 0.828        |
| 405           | Alt. isoform/cryptic donor    | TACTACCAGgtcgagaaca   | 5.199  | 0.529      | 0.954         | 0.034        | 0.965        |
| 406           | Alt. isoform/cryptic acceptor | ttactaccagGTCGAGAACA  | 5.238  | 0.500      | 0.592         | 0.383        | 0.354        |
| 437           | Alt. isoform/cryptic donor    | ACTCTTGCCTgtcagattct  | 4.710  | 0.529      | 0.923         | 0.057        | 0.938        |
| 443           | Alt. isoform/cryptic acceptor | tgcgtgtcagATTCTGCTGA  | 5.120  | 0.514      | 0.630         | 0.357        | 0.433        |
| 504           | Alt. isoform/cryptic donor    | GTTCTCTAAGgtgccagtga  | 9.430  | 0.500      | 0.831         | 0.124        | 0.851        |
| 529           | Alt. isoform/cryptic acceptor | tatcaccaagCTGGACAACA  | 2.328  | 0.500      | 0.853         | 0.139        | 0.837        |
| 552           | Alt. isoform/cryptic donor    | GCACTTCTCTgtggcacca   | 6.302  | 0.514      | 0.893         | 0.079        | 0.912        |
| 592           | Constitutive acceptor         | tctgaccagGACAACCTACC  | 3.778  | 0.543      | 0.341         | 0.630        | 0.460        |
| 649           | Alt. isoform/cryptic acceptor | gtctctcagACCGTTAAGC   | 6.880  | 0.529      | 0.693         | 0.295        | 0.574        |
| 708           | Alt. isoform/cryptic donor    | CCCGTATACCgtgagcatta  | 8.383  | 0.514      | 0.655         | 0.278        | 0.576        |
| 728           | Constitutive acceptor         | acctctccagAGAAGATCAT  | 6.756  | 0.514      | 0.388         | 0.598        | 0.352        |
| 780           | Alt. isoform/cryptic donor    | TGAGCACAAGgtgatctcat  | 9.170  | 0.514      | 0.526         | 0.387        | 0.264        |
| 824           | Alt. isoform/cryptic acceptor | ttaccgaagAGATGCTGGA   | 3.783  | 0.529      | 0.805         | 0.185        | 0.770        |
| 835           | Alt. isoform/cryptic donor    | ATGCTGGATgtgagcacia   | 9.886  | 0.514      | 0.525         | 0.389        | 0.260        |
| 894           | Alt. isoform/cryptic donor    | CAACAAGCGTgtgaggact   | 8.781  | 0.500      | 0.825         | 0.132        | 0.840        |
| 914           | Alt. isoform/cryptic donor    | GCATCATCAAgtagcagaag  | 6.287  | 0.514      | 0.880         | 0.089        | 0.899        |
| 969           | Constitutive acceptor         | cttgattagGCTGATCCTG   | 5.033  | 0.486      | 0.190         | 0.798        | 0.761        |
| 1008          | Constitutive acceptor         | tcctattagATGGCTGGTG   | 7.158  | 0.500      | 0.176         | 0.808        | 0.782        |
| 1046          | Alt. isoform/cryptic donor    | TTTTCTGTGgtacgatctg   | 8.598  | 0.486      | 0.789         | 0.158        | 0.800        |
| 1106          | Alt. isoform/cryptic donor    | GCCTGTGGAAgtaacttccg  | 5.205  | 0.500      | 0.934         | 0.049        | 0.948        |
| 1123          | Alt. isoform/cryptic acceptor | tcggtcaagTGCAGCAACT   | 4.432  | 0.471      | 0.799         | 0.192        | 0.760        |
| 1128          | Alt. isoform/cryptic acceptor | tcaagtgcagCAACTGCGGC  | 3.238  | 0.486      | 0.858         | 0.136        | 0.842        |

|      |                               |                       |        |       |       |       |       |
|------|-------------------------------|-----------------------|--------|-------|-------|-------|-------|
| 1328 | Alt. isoform/cryptic donor    | GCCTGCTTAAgttcgtgacc  | 5.154  | 0.514 | 0.929 | 0.051 | 0.945 |
| 1356 | Alt. isoform/cryptic donor    | GATCGGTCTGgtgatcetta  | 4.853  | 0.486 | 0.642 | 0.284 | 0.558 |
| 1368 | Alt. isoform/cryptic acceptor | tgatccttagCCAGATGCCT  | 2.891  | 0.500 | 0.795 | 0.198 | 0.751 |
| 1372 | Alt. isoform/cryptic acceptor | ccttagccagATGCCTATGT  | 3.041  | 0.529 | 0.730 | 0.259 | 0.646 |
| 1443 | Alt. isoform/cryptic donor    | CCCTGTGCTGgtgaccteta  | 6.777  | 0.471 | 0.866 | 0.100 | 0.884 |
| 1463 | Alt. isoform/cryptic donor    | AGTTTGAAAgtgcctcgag   | 5.015  | 0.543 | 0.964 | 0.026 | 0.973 |
| 1631 | Alt. isoform/cryptic donor    | TGGGCTGCGAgtaacctggac | 4.582  | 0.500 | 0.967 | 0.024 | 0.975 |
| 1783 | Alt. isoform/cryptic donor    | AAGATCAGCGgtatgatcgc  | 7.260  | 0.529 | 0.671 | 0.262 | 0.610 |
| 1795 | Alt. isoform/cryptic donor    | ATGATCGCTGgtgacagcct  | 7.023  | 0.500 | 0.803 | 0.149 | 0.814 |
| 1883 | Alt. isoform/cryptic donor    | TGGATGGCAAgtaaccggtat | 5.025  | 0.500 | 0.926 | 0.053 | 0.943 |
| 1889 | Alt. isoform/cryptic donor    | GCAAGTACCGgtatattggtt | 5.618  | 0.486 | 0.814 | 0.135 | 0.834 |
| 1992 | Alt. isoform/cryptic donor    | CATCAAGAGCgtgggcatcc  | 5.600  | 0.514 | 0.825 | 0.138 | 0.833 |
| 2010 | Alt. isoform/cryptic donor    | CCACTACGAGgtgtcagaga  | 7.706  | 0.500 | 0.765 | 0.178 | 0.767 |
| 2044 | Alt. isoform/cryptic acceptor | tcctattcagTCTACCCACA  | 4.199  | 0.514 | 0.801 | 0.186 | 0.768 |
| 2077 | Constitutive donor            | ACCTGCACCGgtaattcgga  | 7.342  | 0.500 | 0.414 | 0.502 | 0.176 |
| 2097 | Alt. isoform/cryptic acceptor | atactgcagAAAGAACCAG   | 4.833  | 0.529 | 0.869 | 0.122 | 0.860 |
| 2125 | Constitutive acceptor         | aggcttcagGACTTCTGCA   | 3.662  | 0.500 | 0.451 | 0.529 | 0.148 |
| 2191 | Alt. isoform/cryptic donor    | ATTAACGAGGgtgctacttg  | 4.511  | 0.529 | 0.955 | 0.033 | 0.966 |
| 2253 | Alt. isoform/cryptic acceptor | ggatctacagCGTGCTGAAG  | 3.191  | 0.514 | 0.910 | 0.086 | 0.906 |
| 2280 | Alt. isoform/cryptic donor    | CGTTGCCGACgtgtgcatct  | 6.880  | 0.514 | 0.904 | 0.073 | 0.919 |
| 2331 | Alt. isoform/cryptic donor    | TACCGAAGAGgttccatacg  | 4.991  | 0.500 | 0.959 | 0.029 | 0.970 |
| 2359 | Constitutive acceptor         | tctgtccagGCTGATATTC   | 5.600  | 0.514 | 0.373 | 0.611 | 0.389 |
| 2401 | Alt. isoform/cryptic donor    | ATCACCATTGgtgagettat  | 11.534 | 0.529 | 0.522 | 0.395 | 0.242 |
| 2443 | Alt. isoform/cryptic donor    | ATCTACTCCGgtaacattgc  | 9.301  | 0.529 | 0.591 | 0.337 | 0.430 |
| 2469 | Alt. isoform/cryptic donor    | GAACGACCCGgtgaagatgt  | 5.862  | 0.500 | 0.788 | 0.167 | 0.788 |
| 2494 | Alt. isoform/cryptic acceptor | tcactctcagCTTACTCATG  | 6.466  | 0.514 | 0.705 | 0.287 | 0.594 |
| 2618 | Alt. isoform/cryptic donor    | ACACTTACAGgttcaggctct | 7.293  | 0.500 | 0.904 | 0.068 | 0.925 |
| 2619 | Alt. isoform/cryptic acceptor | acacttacagGTTCAGGTCT  | 5.949  | 0.500 | 0.773 | 0.215 | 0.722 |
| 2624 | Alt. isoform/cryptic donor    | ACAGTTTACAGgtctggtctt | 8.772  | 0.486 | 0.925 | 0.054 | 0.942 |
| 2625 | Alt. isoform/cryptic acceptor | acaggttcagGTCTGGTCTT  | 3.359  | 0.514 | 0.684 | 0.296 | 0.567 |
| 2641 | Alt. isoform/cryptic acceptor | tcttgagcagATCTCTGACA  | 4.449  | 0.529 | 0.945 | 0.051 | 0.946 |
| 2661 | Alt. isoform/cryptic acceptor | tccecatcagCTTCAAGGAC  | 3.473  | 0.514 | 0.769 | 0.222 | 0.711 |
| 2668 | Alt. isoform/cryptic acceptor | cagettcaagGACTTCAGCT  | 3.339  | 0.514 | 0.785 | 0.206 | 0.737 |

|      |                               |                      |       |       |       |       |       |
|------|-------------------------------|----------------------|-------|-------|-------|-------|-------|
| 2676 | Alt. isoform/cryptic acceptor | aggacttcagCTCATTCTTC | 2.357 | 0.500 | 0.795 | 0.197 | 0.753 |
| 2751 | Alt. isoform/cryptic donor    | TCTTTTCAAGgttgcaccta | 5.168 | 0.529 | 0.935 | 0.047 | 0.950 |
| 2752 | Alt. isoform/cryptic acceptor | tctttcaagGTTGCACCTA  | 3.558 | 0.500 | 0.699 | 0.281 | 0.598 |
| 2787 | Constitutive acceptor         | cttctactagGCTTAACTGC | 5.710 | 0.500 | 0.455 | 0.528 | 0.138 |
| 2815 | Alt. isoform/cryptic donor    | CTTCTTTGTGgtcaggcct  | 9.649 | 0.529 | 0.757 | 0.184 | 0.757 |
| 2821 | Alt. isoform/cryptic acceptor | ttgtggtcagGGCCTTTCTT | 6.984 | 0.529 | 0.502 | 0.483 | 0.039 |
| 2865 | Alt. isoform/cryptic acceptor | tgaccttcagCACCGCCATC | 4.796 | 0.529 | 0.876 | 0.117 | 0.867 |
| 2908 | Alt. isoform/cryptic acceptor | tacctaccagCTGGCTGTGA | 6.831 | 0.500 | 0.696 | 0.293 | 0.579 |
| 2933 | Alt. isoform/cryptic donor    | GCAGCAACAAgtacaacata | 6.089 | 0.500 | 0.851 | 0.108 | 0.873 |
| 2958 | Alt. isoform/cryptic acceptor | tgttctgcagCGCAAACCCG | 4.988 | 0.500 | 0.635 | 0.350 | 0.448 |
| 3021 | Alt. isoform/cryptic donor    | TTCTGTTGAGgtgctcgtga | 5.200 | 0.514 | 0.963 | 0.028 | 0.971 |
| 3146 | Alt. isoform/cryptic donor    | ATTACATCAAgtccecgctc | 5.088 | 0.500 | 0.945 | 0.041 | 0.956 |
| 3171 | Alt. isoform/cryptic acceptor | tcattgccagCTACTTCGGC | 3.870 | 0.471 | 0.816 | 0.173 | 0.788 |
| 3183 | Alt. isoform/cryptic acceptor | acttcggcagCTTCTTCGAT | 3.003 | 0.486 | 0.868 | 0.128 | 0.853 |
| 3201 | Alt. isoform/cryptic acceptor | atacaatcagGGTGATCCTG | 2.559 | 0.471 | 0.787 | 0.200 | 0.745 |
| 3201 | Alt. isoform/cryptic donor    | TACAATCAGGgtgatcctgc | 5.357 | 0.500 | 0.829 | 0.130 | 0.843 |
| 3249 | Alt. isoform/cryptic acceptor | acttctgcagCATCCTGACC | 7.746 | 0.471 | 0.516 | 0.472 | 0.086 |

The putative intron splicing sites of wild type GP gene sequence was predicted by ASSP).

\* Scores of the preprocessing models reflecting splice site strength, i.e. a PSSM for putative acceptor sites, and an MDD model for putative donor sites. Intron GC values correspond to 70 nt of the neighboring intron.

\*\* Activations are output values of the backpropagation networks used for classification. High values for one class with low values of the other class imply a good classification. Confidence is a simple measure expressing the differences between output activations. Confidence ranges between zero (undecided) to one (perfect classification).

**Table S3. List of primers used in the study.**

| Construct                              | Abbreviation          | Primer sequence (5' to 3')                                                    | Purpose                                                                           |                                                                     |
|----------------------------------------|-----------------------|-------------------------------------------------------------------------------|-----------------------------------------------------------------------------------|---------------------------------------------------------------------|
| p2300-N                                | N                     | <b>F:</b> GGGGTACCATGTCTAAGGTTAAGCTC                                          | To amplify TSWV N and cloned into p2300S                                          |                                                                     |
|                                        |                       | A                                                                             |                                                                                   |                                                                     |
|                                        |                       | <b>R:</b> ACGTCGACTTAAGCAAGTTCTGCAA<br>GTTTGG                                 |                                                                                   |                                                                     |
| p2300-RdRp <sup>wt</sup>               | RdRp <sup>wt</sup>    | <b>F:</b> CGGGATCCATGAACATCCAGAAAATA                                          | To amplify TSWV wildtype RdRp and cloned into p2300S                              |                                                                     |
|                                        |                       | C                                                                             |                                                                                   |                                                                     |
|                                        |                       | <b>R:</b> GACGTCGACTTAATCCGTGCTTCTT<br>CTTC                                   |                                                                                   |                                                                     |
| p2300-RdRp <sup>opt</sup>              | RdRp <sup>opt</sup>   | <b>F:</b> CTCGGTACCATGAACATTCAGAAGAT<br>CCAAAAGC                              | To amplify TSWV optimized RdRp and cloned into p2300S                             |                                                                     |
|                                        |                       | <b>R:</b> GACTCTAGACTAATCGGTGCTCCTT<br>CCTC                                   |                                                                                   |                                                                     |
|                                        |                       |                                                                               |                                                                                   |                                                                     |
| pCXSN-NSs                              | NSs                   | <b>F:</b> CTCGGTACCATGTCTTCAAGTGTTA<br>TGAG                                   | To amplify TSWV NSs and cloned into pCXSN                                         |                                                                     |
|                                        |                       | <b>R:</b> GACTCTAGATTATTTGATCCTGAAG<br>ATATG                                  |                                                                                   |                                                                     |
|                                        |                       |                                                                               |                                                                                   |                                                                     |
| pCB301-HH-S <sub>(-)</sub> -RZ-NOS     | S <sub>(-)</sub>      | <b>F:</b> CGAAAACCCGGTATCCCGGGTTCAG<br>AGCAATTGTGTCATAATTTTATTC               | To amplify the TSWV genomic RNA sequence for construction of S <sub>(-)</sub>     |                                                                     |
|                                        |                       | <b>R:</b> GGTGGAGATGCCATGCCGACCCAGA<br>GCAATTGTGTCATAATTTTATTCAAAC            |                                                                                   |                                                                     |
|                                        |                       | <b>F:</b> GTTTGAATAAAAATTGACACAATTGCT<br>CTGGGTCGGCATGGCATCTCCACC             |                                                                                   | To amplify the pCB301 backbone for construction of S <sub>(-)</sub> |
|                                        |                       | <b>R:</b> GAATAAAAATTATGACACAATTGCTCT<br>GAACCCGGGATACCGGTTTTTCG              |                                                                                   |                                                                     |
|                                        |                       |                                                                               |                                                                                   |                                                                     |
| pCB301-HH-S <sub>(+)</sub> -RZ-NOS     | S <sub>(+)</sub>      | <b>F:</b> CGAAAACCCGGTATCCCGGGTTCAG<br>AGCAATTGTGTCATAATTTTATTCAAAC           | To amplify the TSWV antigenomic RNA sequence for construction of S <sub>(+)</sub> |                                                                     |
|                                        |                       | <b>R:</b> GGTGGAGATGCCATGCCGACCCAGA<br>GCAATTGTGTCATAATTTTATTCCTTA            |                                                                                   |                                                                     |
|                                        |                       | <b>F:</b> GAATAAAAATTATGACACAATTGCTCT<br>GGGTCGGCATGGCATCTC                   |                                                                                   | To amplify the pCB301 backbone for construction of S <sub>(+)</sub> |
|                                        |                       | <b>R:</b> GTTTGAATAAAAATTGACACAATTGCT<br>CTGAACCCGGGATACCGGTTTTTCG            |                                                                                   |                                                                     |
|                                        |                       |                                                                               |                                                                                   |                                                                     |
| pCB301-HH-S <sub>(-)eGFP</sub> -RZ-NOS | SR <sub>(-)eGFP</sub> | <b>F:</b> GCTTTTTTATAATTTAACTTACAAC<br>GCTTTTACTTGTACAGCTCGTCCATGCC<br>GAGA   | To amplify the eGFP for construction of SR <sub>(-)eGFP</sub>                     |                                                                     |
|                                        |                       | <b>R:</b> GTCAAAGCATATAACAACCTTCTACG<br>ATCATCATGGTGAGCAAGGGCGAGGAG<br>CTGTTC |                                                                                   |                                                                     |
|                                        |                       |                                                                               |                                                                                   |                                                                     |
|                                        |                       | <b>F:</b> GAACAGCTCCTCGCCCTTGCTCACC                                           |                                                                                   | To amplify the pCB301 backbone for                                  |
|                                        |                       |                                                                               |                                                                                   |                                                                     |

|                                                                      |                                                     |                                                                                                                                                                                                                                                                              |                                                                                                                                                                                                                             |
|----------------------------------------------------------------------|-----------------------------------------------------|------------------------------------------------------------------------------------------------------------------------------------------------------------------------------------------------------------------------------------------------------------------------------|-----------------------------------------------------------------------------------------------------------------------------------------------------------------------------------------------------------------------------|
|                                                                      |                                                     | ATGATGATCGTAGAAGTTGTTATATGCT<br>TTGAC<br><b>R:</b> TCTCGGCATGGACGAGCTGTACAAG<br>TAAAAGCAGTTGTAAGTTAAATTATAAA<br>AAAGC                                                                                                                                                        | construction of SR <sub>(-)eGFP</sub>                                                                                                                                                                                       |
| pCB301-HH-S <sub>(-)mCherry&amp;eGFP</sub> -RZ-NOS                   | SR <sub>(-)mCherry&amp;eGFP</sub>                   | <b>F:</b> CACAGTACCAATAACCATAATGGTGA<br>GCAAGGGCGAGGAGGATAAC<br><b>R:</b> GAAAAGCTGGACACGCAAGATTA<br>AGATCTGTACAGCTCGTCCATGCCGC<br><b>F:</b> GCGGCATGGACGAGCTGTACAGATC<br>TTAATCTGCGGTGTCAGCTTTTC<br><b>R:</b> GTTATCCTCTCGCCCTTGCTCACCA<br>TTATGGTATTGGTACTGTG              | To amplify the mCherry for construction of SR <sub>(-)mCherry&amp;eGFP</sub><br>To amplify the pCB301 backbone for construction of SR <sub>(-)mCherry&amp;eGFP</sub>                                                        |
| pCB301-T7-S <sub>(-)mCherry&amp;eGFP</sub> -RZ-NOS                   | T7:SR <sub>(-)mCherry&amp;eGFP</sub>                | <b>F:</b> GAAATTAATACGACTCACTATAGGAG<br>AGCAATTGTGCAATTTTATTCAAAC<br><b>R:</b> GGTGGAGATGCCATGCCGACCCAGA<br>GCAATTGTGTCATAATTTATTCTTA<br><b>F:</b> GTTTGAATAAAAATTGACACAATTGCT<br>CTCCTATAGTGAGTCGTATTAATTTTC<br><b>R:</b> GAATAAAATTATGACACAATTGCTCT<br>GGGTCGGCATGGCATCTC  | To amplify the eGFP and mCherry expression cassette for construction of T7:SR <sub>(-)mCherry&amp;eGFP</sub><br>To amplify the pCB301 backbone for construction of T7:SR <sub>(-)mCherry&amp;eGFP</sub>                     |
| pCB301-HH-S <sub>(+)eGFP</sub> -RZ-NOS                               | SR <sub>(+)eGFP</sub>                               | <b>F:</b> GGAAAAGCTGGACACGGCAAGATTA<br>CTTGACAGCTCGTCCATGCCGAG<br><b>R:</b> GAACACAGTACCAATAACCATAATG<br>GTGAGCAAGGGCGAGGAGCTGTTC<br><b>F:</b> GAACAGCTCCTCGCCCTGCTCACCA<br>TTATGGTATTGGTACTGTGTTC<br><b>R:</b> CTCGGCATGGACGAGCTGTACAAGT<br>AATCTTGCCGTGCCAGCTTTTCC         | To amplify the eGFP for construction of SR <sub>(+)eGFP</sub><br>To amplify the pCB301 backbone for construction of SR <sub>(+)eGFP</sub>                                                                                   |
| pCB301-HH-S <sub>(-)mCherry&amp;eGFP</sub> <sup>Δ5'UTR</sup> -RZ-NOS | SR <sub>(-)mCherry&amp;eGFP</sub> <sup>Δ5'UTR</sup> | <b>F:</b> CGAAAACCCGGTATCCCGGGTTCAT<br>GGTGAGCAAGGGCGAGGAGGATAAC<br><b>R:</b> GGTGGAGATGCCATGCCGACCCAGA<br>GCAATTGTGTCATAATTTATTCAAAC<br><b>F:</b> GTTTGAATAAAAATTGACACAATTGCT<br>CTGGGTCGGCATGGCATCTCCACC<br><b>R:</b> GTTATCCTCTCGCCCTTGCTCACCA<br>TGAACCCGGGATACCGGTTTTCG | To amplify the Δ5'UTR expression cassette for construction of SR <sub>(-)mCherry&amp;eGFP</sub> <sup>Δ5'UTR</sup><br>To amplify the pCB301 backbone for construction of SR <sub>(-)mCherry&amp;eGFP</sub> <sup>Δ5'UTR</sup> |
| pCB301-HH-S <sub>(-)mCherry&amp;eGFP</sub> <sup>ΔIGR</sup> -RZ-NOS   | SR <sub>(-)mCherry&amp;eGFP</sub> <sup>ΔIGR</sup>   | <b>F:</b> CGAAAACCCGGTATCCCGGGTTCAG<br>AGCAATTGTGTCATAATTTATTTC<br><b>R:</b> GCATGGACGAGCTGTACAAGTAATT<br>AAGATCTGTACAGCTCGTC<br><b>F:</b> GACGAGCTGTACAGATCTTAATTAC<br>TTGTACAGCTCGTCCATGCCGAGA                                                                             | To amplify the ΔIGR expression cassette for construction of SR <sub>(-)mCherry&amp;eGFP</sub> <sup>ΔIGR</sup><br>To amplify the pCB301 backbone for construction of SR <sub>(-)mCherry&amp;eGFP</sub> <sup>ΔIGR</sup>       |

|                                                                     |                                                    |                                                                                                                                                       |                                                                                                                  |
|---------------------------------------------------------------------|----------------------------------------------------|-------------------------------------------------------------------------------------------------------------------------------------------------------|------------------------------------------------------------------------------------------------------------------|
|                                                                     |                                                    | <b>R:</b> GAATAAAATTATGACACAATTGCTCT<br>GAACCCGGGATACCGGGTTTTCG                                                                                       |                                                                                                                  |
| pCB301-HH-S <sub>(-)mCherry&amp;eGFP<sup>Δ3'UTR</sup></sub> -RZ-NOS | SR <sub>(-)mCherry&amp;eGFP<sup>Δ3'UTR</sup></sub> | <b>F:</b> CGAAAACCCGGTATCCCGGGTTCAG<br>AGCAATTGTGCATAATTTTATTC<br><b>R:</b> GGTGGAGATGCCATGCCGACCCATG<br>GTGAGCAAGGGCGAGGAGCTGTTC                     | To amplify the Δ3'UTR expression cassette for construction of SR <sub>(-)mCherry&amp;eGFP<sup>Δ3'UTR</sup></sub> |
|                                                                     |                                                    | <b>F:</b> GAACAGCTCCTCGCCCTTGCTCACC<br>ATGGGTCGGCATGGCATCTCCACC<br><b>R:</b> GAATAAAATTATGACACAATTGCTCT<br>GAACCCGGGATACCGGGTTTTCG                    | To amplify the pCB301 backbone for construction of SR <sub>(-)mCherry&amp;eGFP<sup>Δ3'UTR</sup></sub>            |
| pCB301-HH-M <sub>(-)mCherry</sub> -RZ-NOS                           | M <sub>(-)</sub>                                   | <b>F:</b> CGAAAACCCGGTATCCCGGGTTCAG<br>AGCAATCAGTGCATCAGAAATATAACC<br><b>R:</b> GGTGGAGATGCCATGCCGACCCAGA<br>GCAATCAGTGCAAACAAAAAAC                   | To amplify the TSWV genomic M-RNA sequence for construction of M <sub>(-)</sub>                                  |
|                                                                     |                                                    | <b>F:</b> GTTTTGTGTTGCACTGATTGCTCTGG<br>GTCGGCATGGCATCTCCACC<br><b>R:</b> GGTATATTCTGATGCACTGATTGCT<br>CTGAACCCGGGATACCGGGTTTTCG                      | To amplify the pCB301 backbone for construction of M <sub>(-)</sub>                                              |
| pCB301-HH-M <sub>(+)mCherry</sub> -RZ-NOS                           | M <sub>(+)</sub>                                   | <b>F:</b> CGAAAACCCGGTATCCCGGGTTCAG<br>AGCAATCAGTGCACAAAAAACTC<br><b>R:</b> GGTGGAGATGCCATGCCGACCCAGA<br>GCAATCAGTGCGTCAGAAATATAAC                    | To amplify the TSWV antigenomic M-RNA sequence for construction of M <sub>(+)</sub>                              |
|                                                                     |                                                    | <b>F:</b> GTATATTCTGACGCACTGATTGCTC<br>TGGGTCGGCATGGCATCTCCACC<br><b>R:</b> GAGTTTTTGTGTTGCACTGATTGCTCT<br>GAACCCGGGATACCGGGTTTTCG                    | To amplify the pCB301 backbone for construction of M <sub>(+)</sub>                                              |
| pCB301-HH-M <sub>(-)eGFP</sub> -RZ-NOS                              | MR <sub>(-)eGFP</sub>                              | <b>F:</b> GAATCAAATTTAGCCTGTGACAAGC<br>AGACTTACTTGTACAGCTCGTCCATGC<br><b>R:</b> CCATTATAATCTGAGCAGACGTATA<br>AGATGGTGAGCAAGGGCGAGGAGCTG               | To amplify the eGFP for construction of MR <sub>(-)eGFP</sub>                                                    |
|                                                                     |                                                    | <b>F:</b> CAGCTCCTCGCCCTTGCTCACCATCT<br>TATACGTCTGCTCAGATTATAATGG<br><b>R:</b> GCATGGACGAGCTGTACAAGTAAGT<br>CTGCTTGTACAGGCTAAATTTGATTC                | To amplify the pCB301 backbone for construction of MR <sub>(-)eGFP</sub>                                         |
| pCB301-HH-M <sub>(-)mCherry</sub> -RZ-NOS                           | MR <sub>(-)mCherry</sub>                           | <b>F:</b> GAATCAAATTTAGCCTGTGACAAGC<br>AGACTTAAGATCTGTACAGCTCGTCCAT<br>GC<br><b>R:</b> CCATTATAATCTGAGCAGACGTATA<br>AGATGGTGAGCAAGGGCGAGGAGGAT<br>AAC | To amplify the mCherry for construction of MR <sub>(-)mCherry</sub>                                              |
|                                                                     |                                                    | <b>F:</b> GTTATCCTCCTCGCCCTTGCTACCA<br>TCTTATACGTCTGCTCAGATTATAATGG<br><b>R:</b> GCATGGACGAGCTGTACAGATCTTA                                            | To amplify the pCB301 backbone for construction of MR <sub>(-)mCherry</sub>                                      |



|                                                   |                                  |                                      |                                                    |
|---------------------------------------------------|----------------------------------|--------------------------------------|----------------------------------------------------|
|                                                   |                                  | AGTCTGCTTGTACACAGGCTAAATTTGAT        |                                                    |
|                                                   |                                  | TC                                   |                                                    |
|                                                   |                                  | <b>F:</b> CTCTACCTTAGGCTGTGAACTCAA   |                                                    |
|                                                   |                                  | AATGTAGACTCTTTTCGGTAATAAGG           | To amplify the NSm <sup>Mut</sup> for construction |
|                                                   |                                  | <b>R:</b> GCATGGACGAGCTGTACAAGTAAGT  | of MR <sub>(-)eGFP&amp;NSmMut</sub>                |
|                                                   |                                  | CTGCTTGTACACAGGCTAAATTTGATT          |                                                    |
| pCB301-HH-M <sub>(-)eGFP&amp;NSmMut</sub> -RZ-NOS | MR <sub>(-)eGFP&amp;NSmMut</sub> | <b>F:</b> GAATCAAATTTAGCCTGTGACAAGC  |                                                    |
|                                                   |                                  | AGACTTACTTGTACAGCTCGTCCATGC          | To amplify the pCB301 backbone for                 |
|                                                   |                                  | <b>R:</b> CTTTATTACGAAAAGAGTCTACAT   | construction of MR <sub>(-)eGFP&amp;NSmMut</sub>   |
|                                                   |                                  | TTTGAGTTCAACAGCCTAAGGTAGAG           |                                                    |
|                                                   |                                  | <b>F:</b> CGAAAACCCGGTATCCCGGGTTCAG  |                                                    |
|                                                   |                                  | AGCAATCAGGTACAATAAAAC                | To amplify the TSWV genomic L-RNA                  |
|                                                   |                                  | <b>R:</b> GGTGGAGATGCCATGCCGACCCAGA  | for construction of L <sub>(-)</sub>               |
|                                                   |                                  | GCAATCAGGTAACAACGAT                  |                                                    |
| pCB301-HH-L <sub>(-)</sub> -RZ-NOS                | L <sub>(-)</sub>                 | <b>F:</b> ATCGTGTACCTGATTGCTCTGGGT   |                                                    |
|                                                   |                                  | CGGCATGGCATCTCCACC                   | To amplify the pCB301 backbone for                 |
|                                                   |                                  | <b>R:</b> GTTTTAGTTGACCTGATTGCTCTGA  | construction of L <sub>(-)</sub>                   |
|                                                   |                                  | ACCCGGGATACCCGGTTTTTCG               |                                                    |
|                                                   |                                  | <b>F:</b> CGAAAACCCGGTATCCCGGGTTCAG  |                                                    |
|                                                   |                                  | AGCAATCAGGTAACAACGAT                 | To amplify the TSWV antigenomic L-                 |
|                                                   |                                  | <b>R:</b> GTGGAGATGCCATGCCGACCCAGAG  | RNA for construction of L <sub>(-)</sub>           |
|                                                   |                                  | CAATCAGGTACAATAAAAC                  |                                                    |
| pCB301-HH-L <sub>(+)</sub> -RZ-NOS                | L <sub>(+)</sub>                 | <b>F:</b> GTTTTAGTTGACCTGATTGCTCTGG  |                                                    |
|                                                   |                                  | GTCGGCATGGCATCTCCAC                  | To amplify the pCB301 backbone for                 |
|                                                   |                                  | <b>R:</b> ATCGTTGTTACCTGATTGCTCTGAAC | construction of L <sub>(+)</sub>                   |
|                                                   |                                  | CCGGGATACCCGGTTTTTCG                 |                                                    |
|                                                   |                                  | <b>F:</b> ATCAGGTAACAACGATTTAAGCAA   |                                                    |
|                                                   |                                  | ACATGAACATTCAGAAGATCCAAAAGC          | To amplify the RdRp-optimized for                  |
|                                                   |                                  | TG                                   | construction of L <sub>(+)opt</sub>                |
|                                                   |                                  | <b>R:</b> CATGCATTGTTAGGCATTACTTTTAA |                                                    |
|                                                   |                                  | TCTAATCGGTGCTCTTCTCATCAG             |                                                    |
| pCB301-HH-L <sub>(+)opt</sub> -RZ-NOS             | L <sub>(+)opt</sub>              | <b>F:</b> CTGATGAGGAAGAGGACACCGATT   |                                                    |
|                                                   |                                  | AGATTAAGTAATGCCTAACAATGCA            | To amplify the pCB301 backbone for                 |
|                                                   |                                  | TG                                   | construction of L <sub>(+)opt</sub>                |
|                                                   |                                  | <b>R:</b> CAGCTTTGGATCTTCTGAATGTTCA  |                                                    |
|                                                   |                                  | TGTTTGCTTAAAATCGTTGTACCTGAT          |                                                    |
|                                                   |                                  | <b>F:</b> ACCATTATAATCTGAGCAGACGTAT  |                                                    |
|                                                   |                                  | AAGATGAGGATCCTGAAGCTTCTTG            | To amplify the GP-optimized for                    |
|                                                   |                                  | <b>R:</b> GAATCAAATTTAGCCTGTGACAAGC  | construction of M <sub>(-)opt</sub>                |
|                                                   |                                  | AGACCTAAACAAGATGAGAGAAATC            |                                                    |
| pCB301-HH-M <sub>(-)opt</sub> -RZ-NOS             | M <sub>(-)opt</sub>              | <b>F:</b> GATTTCTCTCATCTTGTAGTCTG    |                                                    |
|                                                   |                                  | CTTGTCACAGGCTAAATTTGATT              | To amplify the pCB301 backbone for                 |
|                                                   |                                  | <b>R:</b> CAAGAAGCTTCAGGATCCTCATCTT  | construction of M <sub>(-)opt</sub>                |

|                   |   | ATACGTCTGCTCAGATTATAATGGT                                                                                                               |                                                                                                                                           |
|-------------------|---|-----------------------------------------------------------------------------------------------------------------------------------------|-------------------------------------------------------------------------------------------------------------------------------------------|
| pGEM-NSs          | - | <b>F:</b> GTTAATACTAACGGAGTGAAAC<br><b>R:</b> GATTGAAATTTGGCTTGAAACAGTA<br>C                                                            | To amplify the sense-NSs for construction of pGEM-NSs to generate the DIG-tabled probes of S vRNA in Northern blotting                    |
| pGEM-anti-NSs     | - | <b>F:</b> GATTGAAATTTGGCTTGAAACAGTA<br><b>R:</b> GTTAATACTAACGGAGTGAAAC                                                                 | To amplify the antisense-NSs for construction of pGEM-anti-NSs to generate the DIG-tabled probes of S cRNA in Northern blotting           |
| pGEM-NSm          | - | <b>F:</b> GCTTTGACTAAAGCTATGGATAC<br><b>R:</b> TCTTGTATTCTTGGCTGCACATC                                                                  | To amplify the sense-NSm for construction of pGEM-NSm to generate the DIG-tabled probes of M vRNA in Northern blotting                    |
| pGEM-anti-NSm     | - | <b>F:</b> TCTTGTATTCTTGGCTGCACATC<br><b>R:</b> GCTTTGACTAAAGCTATGGATAC                                                                  | To amplify the antisense-NSm for construction of pGEM-anti-NSm to generate the DIG-tabled probes of M cRNA in Northern blotting           |
| pGEM-L 3'UTR      | - | <b>F:</b> AGAGCAATCAGGTACAACATAAAC<br><b>R:</b> AAGTAATGCCTAACAATGCATGA                                                                 | To amplify the L 3'UTR for construction of pGEM- L 3'UTR to generate the DIG-tabled probes of L vRNA in Northern blotting                 |
| pGEM-anti-L 3'UTR | - | <b>F:</b> AAGTAATGCCTAACAATGCATGA<br><b>R:</b> AGAGCAATCAGGTACAACATAAAC                                                                 | To amplify the antisense-L 3'UTR for construction of pGEM-anti-L 3'UTR to generate the DIG-tabled probes of L cRNA in Northern blotting   |
| pGEM-eGFP         | - | <b>F:</b> ATGGTGAGCAAGGGCGAGGAGCTGTTC<br><b>R:</b> ATGGTGAGCAAGGGCGAGGAGCTGTTC                                                          | To amplify the sense-eGFP for construction of pGEM-eGFP to generate the DIG-tabled probes of antisense-eGFP RNA in Northern blotting      |
| pGEM-anti-eGFP    | - | <b>F:</b> ATGGTGAGCAAGGGCGAGGAGCTGTTC<br><b>R:</b> ATGGTGAGCAAGGGCGAGGAGCTGTTC                                                          | To amplify the antisense-eGFP for construction of pGEM-anti-eGFP to generate the DIG-tabled probes of sense-eGFP RNA in Northern blotting |
| -                 | - | <b>F:</b> GGTGGAGATGCCATGCCGACCCAGA<br>GCAATTGTGTCATAATTTTATTCTTA<br><b>R:</b> GGTGGAGATGCCATGCCGACCCAGA<br>GCAATTGTGTCATAATTTTATTCAAAC | To amplify the of $S_{(+)\text{eGFP}}$ minigenome by RT-PCR                                                                               |
| -                 | - | <b>F:</b> GTTCATTTCAATTTGGAGAGGAGAGC<br>ATCAGTGCACAAAAAAC<br><b>R:</b> GGTGGAGATGCCATGCCGACCCAGA<br>GCAATCAGTGCATCAGAAATATAC            | To amplify the of $M_{(-)\text{mCherry}}$ and $M_{(-)\text{eGFP}}$ minigenome by RT-PCR                                                   |
| -                 | - | <b>F:</b> GAATCAAATTTAGCTGTGACAAGC                                                                                                      | To amplify the of $M_{(-)\text{opt}}$ genome by RT-                                                                                       |

---

|   |                                     |                                                     |
|---|-------------------------------------|-----------------------------------------------------|
|   | AGACCTAAACAAGATGAGAGAAATC           | PCR                                                 |
|   | <b>R:</b> GGTGGAGATGCCATGCCGACCCAGA |                                                     |
|   | GCAATCAGTGCAAACAAAAAC               |                                                     |
|   | <b>F:</b> GATCAAGGATGTTAATTCAGCATGC |                                                     |
|   | TTATCCCGATCCTCGAC                   | To amplify the of $L_{(+)\text{opt}}$ antigenome by |
| - | <b>R:</b> GAATCAAATTTAGCCTGTGACAAGC | RT-PCR                                              |
|   | AGACCTAAACAAGATGAGAGAAATC           |                                                     |

---
